# Supplementary material for: Rapid evolution of piRNA-mediated silencing of an invading transposable element was driven by abundant de novo mutations
Source: HighWire-hosted journal article supplement (doi:10.1101/gr.251546.119), 2020-04-01
Supplement: Supplemental_Table_S1_.xlsx [file Supplemental_Table_S1_.xlsx]

## Sheet: Sheet1
Table S1. Small RNA sequencing libraries used for ancestral piRNA cluster annotation. Biological replicates are combined in the heatmap showing piRNA clusters are differentially expressed (Fig. 1).
ID	SRR	Strain	Library preparation method	2S rRNA depletion	oxidated	Heatmap ID	Reference
1	SRR7814378	21147-R1	NEBNext Small RNA Library Prep for Illumina	Terminator oligo blocking	Not oxidated	21147	Libraries from 1 to 18 come from Zhang et al., 2020 (this article)
2	SRR7814377	21147-R2
3	SRR7814385	21147-R3
4	SRR7814381	21183-R1				21183
5	SRR7814382	21183-R2
6	SRR7814390	21183-R3
7	SRR7814387	21188-R1				21188
8	SRR7814388	21188-R2
9	SRR7814384	21188-R3
10	SRR7814383	21213-R1				21213
11	SRR7814380	21213-R2
12	SRR7814379	21213-R3
13	SRR7814375	21291-R1				21291
14	SRR7814389	21291-R2
15	SRR7814376	21291-R3
16	SRR7814386	21346-R1				21346
17	SRR7814374	21346-R2
18	SRR7814373	21346-R3
19	SRR014280	w1118 3-5-day-old ovary	3' and 5' adapter were added to extracted RNA. Ligated producated were reverse transcribed and PCR amplified before sequencing	without 2S depletion	Not oxidated	w1118_1	Brennecke et al., 2008
20	SRR3715417	w1118 ovaries	Based on Illumina TrueSeq Small RNA sample prep kit. Four random nucleotides were added at 3' end of 5' adaptor and 5' end of 3' adaptor.	without 2S depletion	oxidated using NaIO4	w1118_2	Hayashi et al., 2016
21	SRR3715418	w1118 total ovaries		hybridization to immobilized oligos anchored to magnetic beads		w1118_3
22	SRR1785658	w1118 2-day-old ovaries	Illumina TruSeq Small RNA sample prep kit	Terminator oligo blocking	Not oxidated	w1118_4	Lo et al., 2016
23	SRR1785659	w1118 2-day-old ovaries
24	SRR1785660	w1118 2-day-old ovaries
25	SRR827770	y[1]; cn[1] bw[1] sp[1]	19-28 nt small RNA were selected using polyacrylamide gels. Then, 3' and 5' adapter were added. Ligated producated were reverse transcribed and PCR amplified before sequencing	without 2S depletion	Not oxidated	2057	Shpiz et at., 2014
26	SRR891254	cn bw	Illumina Small RNA Library Prep Kit	without 2S depletion	Not oxidated	cn bw	Pane et al., 2011
27	SRR891255	cn bw
