# Supplementary material for: Rapid evolution of piRNA-mediated silencing of an invading transposable element was driven by abundant de novo mutations
Source: HighWire-hosted journal article supplement (doi:10.1101/gr.251546.119), 2020-04-01
Supplement: Supplemental_Table_S2.xlsx [file Supplemental_Table_S2.xlsx]

## Sheet: Sheet1
Table S2. Annotated 159 ancetral piRNA clusters and their expression levels. For each piRNA cluster, the chromosome location is indicated. For example, chr2L:350001..355025 represents the piRNA cluster which is located at chromosome 2L and starts from the coordinate 350001 to 355025 (based on the dm6 reference genome). Expression levels are measured in RPKM (Reads Per Kilobase per Millon mapped r…
cluster	21147	21183	21188	21213	21291	21346	w1118_1	w1118_2	w1118_3	w1118_4	2057	cn bw
chr2L:350001..355025	31.5298	30.4253	38.1818	28.4575	45.292	21.4338	82.5781	25.5135	18.5059	69.1357	129.237	19.5189
chr2L:1221000..1226026	33.4585	31.3944	37.5897	27.4717	44.3797	21.0902	79.4505	24.6518	17.8471	72.0732	130.679	17.6833
chr2L:1679024..1685021	30.6782	29.1758	36.596	27.7805	42.3448	19.3918	80.8663	24.5985	17.8241	64.8841	125.965	18.3134
chr2L:4453828..4461990	47.2009	75.1069	59.1692	5.67454	16.1924	153.037	14.6395	10.0439	15.378	422.684	9.88408	4.20008
chr2L:8257358..8262679	10.7658	10.0358	15.8908	24.4528	20.1447	22.3225	1668.97	109.674	79.0019	243.135	104.237	1.92896
chr2L:10158001..10163022	32.928	31.0591	37.3423	27.4411	44.3148	21.1827	81.0018	25.0334	18.1587	69.3231	126.353	17.8527
chr2L:11540310..11548409	64.4377	47.7381	31.7418	23.4515	33.3028	36.9944	23.776	196.772	143.385	38.6064	46.6073	71.4913
chr2L:11714001..11719027	30.6963	29.3892	36.6917	27.6281	44.0836	20.9944	78.0537	25.288	18.3551	67.4729	124.479	19.4237
chr2L:12936000..12941022	31.4269	30.3325	38.0459	28.436	45.2144	21.3866	84.0663	25.9572	18.7834	69.2227	128.203	19.5286
chr2L:15446004..15452025	30.2954	28.3779	33.8423	24.7368	39.4123	18.6698	83.0452	24.1565	17.4759	65.793	125.111	17.1851
chr2L:16694112..16703026	857.96	791.977	882.786	2112.79	1577.67	1034.8	1342.97	225.057	161.355	206.718	348.024	9.55082
chr2L:19348000..19353022	31.1854	28.65	35.3669	26.7457	42.5274	20.367	82.6098	25.1733	18.2436	63.7903	124.03	18.9137
chr2L:19565043..19574709	25.303	26.683	37.7509	61.4004	44.6339	39.4343	4261.51	391.133	267.345	280.736	227.012	5.57929
chr2L:20101033..20120017	48.474	148.141	294.496	65.9958	42.1387	197.188	225.648	81.6356	58.0304	152.977	293.487	79.4811
chr2L:20145009..20224018	137.037	64.3973	119.574	100.069	72.4868	102.868	203.585	52.8725	38.0779	83.0045	170.163	54.0057
chr2L:20305001..20310023	31.4444	29.9558	37.6844	28.1253	45.03	21.1684	75.6534	25.1431	18.2288	66.7094	123.887	18.4928
chr2L:21348000..21353019	31.19	29.8318	37.2196	28.2058	44.9904	21.29	80.0305	25.4584	18.4431	64.3763	126.929	19.9021
chr2L:23235000..23245024	58.3499	228.991	160.845	107.057	56.5275	208.797	55.7934	63.5594	45.9042	89.3661	33.9921	20.0351
chr2L:23328000..23337026	12.225	554.864	557.734	14.2799	10.9818	471.479	14.6676	10.99	7.81424	15.2076	14.4528	310.273
chr2R:301001..319021	120.296	145.079	146.598	184.671	125.318	152.603	62.2317	54.4859	39.5211	74.626	34.4243	7.16693
chr2R:338001..343023	32.2213	29.5277	36.1463	27.3715	43.7573	20.7921	81.7775	25.2664	18.3429	68.1356	125.398	17.8856
chr2R:714002..722024	130.218	134.997	140.98	152.143	119.844	127.176	71.1931	70.3034	50.7443	68.6207	48.0982	21.2879
chr2R:1050027..1064986	90.0914	42.4787	46.6477	110.642	96.2732	52.2893	25.676	44.0941	31.4447	46.765	25.6945	6.11836
chr2R:1237000..1242028	31.2621	29.9761	37.3061	28.204	44.8948	21.2931	80.445	25.5692	18.54	68.8289	128.619	19.9002
chr2R:1609000..1632020	76.5309	100.499	113.66	115.507	102.662	123.483	62.1628	69.114	50.3412	83.771	60.9082	26.4592
chr2R:1968001..1975940	81.8868	59.3539	32.4424	29.0535	34.2684	45.4491	70.4534	18.7194	13.7354	94.766	124.189	17.1157
chr2R:2021008..2033025	147.699	123.816	140.22	89.3147	123.805	126.617	50.3135	89.7135	64.4734	48.2212	47.5804	18.6925
chr2R:2162000..2171027	61.1527	52.3641	34.7048	25.4933	36.9604	39.5858	26.5493	180.616	131.577	35.8596	47.3636	68.1832
chr2R:2544008..2553755	69.7464	204.639	154.386	136.83	107.724	140.88	3.51179	46.1685	32.6063	29.9123	2.34224	63.8139
chr2R:3505007..3514022	59.0655	43.8267	29.1484	22.9902	31.8169	33.7618	23.5813	175.895	128.376	35.1251	42.5909	63.2409
chr2R:3883001..3892026	57.8347	44.3304	29.7811	23.4706	32.3181	35.1402	24.289	174.463	127.174	38.6312	42.7261	62.6286
chr2R:4081050..4086966	115.086	50.6476	58.104	94.8463	101.785	58.8531	37.0265	50.8561	37.6352	31.073	29.6905	11.0755
chr2R:4870005..4878934	62.4714	102.521	98.3507	97.9125	46.3225	130.564	41.4885	88.7725	64.7145	34.5136	22.5919	82.1861
chr2R:5387001..5394933	80.4016	59.777	33.3162	29.8784	35.1868	45.6826	73.2971	21.9138	15.9359	96.1286	124.639	20.9379
chr2R:6256021..6472023	440.285	318.989	301.533	454.465	411.78	287.877	224.374	233.191	170.654	289.483	204.411	62.9278
chr2R:6482001..6493959	67.6311	75.8126	136.42	80.8296	77.8388	104.45	179.951	132.129	94.8734	131.415	109.718	148.055
chr2R:9551096..9556747	75.2334	56.4743	72.2823	485.36	534.523	161.294	11.0199	58.8032	48.935	29.3531	21.7111	5.7823
chr2R:12166449..12172782	43.3024	41.0502	68.1495	100.576	48.6177	50.4991	102.332	73.5092	46.3533	25.9264	155.725	6.49014
chr2R:13326146..13333813	272.923	179.1	246.616	417.482	291.386	231.623	52.0003	26.4793	17.3132	385.392	155.816	1092.22
chr2R:14618770..14626577	100.686	157.573	92.6386	62.4456	126.304	167.336	9.92352	22.6921	57.6965	913.683	125.661	13.5882
chr2R:16216023..16224007	43.3003	19.304	34.2918	12.9499	42.5927	36.9408	55.033	101.845	98.2441	11.9824	61.5777	1.86477
chr2R:16827006..16835930	199.139	281.548	267.503	563.034	363.774	324.249	3388.17	384.296	285.638	149.427	1415.45	54.6901
chr2R:17779113..17787966	23.9692	28.401	46.7242	60.2173	51.3011	63.3282	67.0855	13.4452	9.65921	369.223	85.7257	24.5501
chr2R:18488000..18494026	30.6976	29.3964	34.9351	25.5325	40.7126	19.0369	84.958	24.5212	17.7312	67.9857	128.314	17.8845
chr2R:19716001..19766369	67.3721	63.8829	80.2596	52.3345	168.388	99.0849	40.6045	77.1134	106.158	39.7046	142.341	11.8948
chr2R:20582088..20588749	376.492	196.926	303.855	790.289	999.87	439.628	73.1831	98.3411	76.1002	1773.95	167.821	110.195
chr2R:20604696..20610442	597.646	661.795	519.106	1034.87	824.009	893.776	89.6055	138.697	81.1138	59.9408	322.63	63.3597
chr2R:24180005..24184980	34.9878	44.3268	38.9171	33.6659	47.6541	48.8585	41.3504	99.3837	74.1863	36.4442	125.345	56.5734
chr2R:25251000..25285023	116.835	98.3379	99.9974	110.389	112.031	144.738	98.9647	133.919	95.9907	81.8869	116.25	138.776
chr3L:57003..71022	211.761	0.438528	0.130574	0.295967	0.310459	0.200846	1.50918	0.666584	0.339839	14.2017	0.21191	5.68257
chr3L:638015..646696	737.986	933.483	949.491	1668.77	1059.69	841.583	2574.87	659.677	395.247	245.024	3554.96	125.501
chr3L:1376001..1383908	32.5464	19.6216	37.9211	16.2777	27.5139	38.2392	115.858	96.4711	92.207	19.4889	37.1723	2.59024
chr3L:1394017..1402992	57.8875	34.6937	67.139	29.1486	48.7071	67.4228	221.133	152.228	146.998	40.106	64.5685	8.92314
chr3L:11822856..11828660	6.38218	16.2393	15.0242	8.26642	11.0248	12.3319	12.684	10.2727	7.87406	23.3329	13.8013	140.06
chr3L:14825181..14832850	85.2546	61.7896	34.1677	30.3757	35.8814	47.7006	73.8203	20.2426	14.7774	98.7382	129.691	19.2843
chr3L:18711004..18718712	86.6688	69.6836	38.0497	34.6851	42.7929	52.8552	86.0491	21.033	15.3496	116.727	153.661	21.4068
chr3L:19861019..19868905	141.773	68.5855	60.3771	68.0396	80.1973	112.134	27.9445	60.0191	44.7226	79.3916	56.0079	88.8242
chr3L:22556000..22561026	29.3384	28.9674	38.0243	29.5014	43.8193	20.0196	84.1655	25.6021	18.5751	69.0416	126.847	18.5567
chr3L:22619000..22624018	32.2283	29.5227	36.1359	27.3588	43.7428	20.7973	81.3262	25.1691	18.2699	68.1625	125.242	17.8791
chr3L:23295000..23315995	144.963	169.35	140.236	208.879	152.053	163.268	173.717	327.48	236.601	178.348	67.1638	67.6462
chr3L:23916001..23923016	22.928	66.2876	81.3578	60.7052	96.2014	105.754	67.9164	87.7092	64.2861	100.327	119.561	59.1634
chr3L:24301002..24310003	37.9221	63.9364	56.5908	48.4275	33.3236	102.047	51.0131	37.1233	26.9253	29.7029	23.6427	17.7278
chr3L:24446011..24455022	102.071	60.9523	66.254	120.895	104.732	65.7582	38.0237	57.7829	41.6234	61.5016	31.0072	7.25783
chr3L:24542018..24554022	30.0466	55.4855	36.2693	34.9561	123.041	51.0703	18.0465	29.8872	21.5065	25.7416	14.9346	26.1053
chr3L:25286036..25291964	48.6936	39.4085	68.6363	54.5988	57.7092	84.2654	144.843	37.0265	25.7299	129.97	80.3685	49.315
chr3L:25608029..25619012	251.115	161.262	165.838	376.819	379.694	184.769	290.216	146.926	106.941	199.662	179.906	52.6248
chr3L:26022002..26030000	92.7971	121.858	113.206	135.585	116.962	152.177	23.6229	131.995	94.1304	100.077	31.3198	60.8061
chr3L:26063001..26127008	67.3364	142.027	132.607	167.168	111.091	126.751	60.0707	113.176	81.4753	95.3346	42.5758	52.294
chr3L:26570000..26581989	169.183	127.342	124.709	156.925	128.442	114.343	65.6467	111.971	82.3246	87.9212	75.4776	9.52007
chr3L:26876012..26882321	42.8096	41.7642	25.7547	27.4645	17.0921	30.8123	78.2466	125.922	93.6193	39.9442	75.5208	125.62
chr3L:26936122..26952523	54.0872	58.5712	33.2647	30.4347	15.6983	41.4744	128.343	183.381	133.578	77.4622	109.659	196.123
chr3L:27006381..27030919	149.616	118.415	112.919	135.787	105.903	104.929	110.672	174.948	128.373	82.7769	106.765	72.5884
chr3L:27068000..27075019	26.8037	38.214	17.6292	20.532	8.13986	27.1611	138.776	80.0074	55.4414	23.7845	45.0314	101.894
chr3R:524019..531024	111.968	102.316	111.426	61.5622	84.2537	104.533	33.1422	46.5965	33.172	126.019	57.9762	34.3133
chr3R:965012..970011	80.3353	52.1795	62.3684	47.8133	70.3162	54.952	74.9542	48.1232	35.2084	88.9828	127.221	32.0724
chr3R:992001..997025	95.4304	59.4395	71.7847	54.6513	80.1129	61.8637	76.8134	50.7883	37.0987	93.0131	127.713	32.9214
chr3R:1411002..1417004	8.16568	124.515	101.742	8.02336	6.02618	87.5015	10.434	15.3869	10.6422	17.9338	6.38818	24.0049
chr3R:2144000..2149024	32.718	31.329	37.5912	27.4014	44.1104	20.7957	74.3238	24.72	17.9212	69.9797	129.439	17.6609
chr3R:3161001..3169027	147.533	115.594	110.395	142.066	117.262	99.1052	63.6043	100.107	73.3513	86.4179	73.0481	12.6598
chr3R:3381003..3390025	136.366	126.426	119.274	142.657	98.0964	215.96	62.6059	109.956	78.2096	141.606	25.0558	62.1988
chr3R:3909004..3915002	169.563	103.51	72.2874	112.059	71.3538	225.319	102.81	116.608	83.3462	135.2	22.1836	52.0406
chr3R:5622185..5629554	12.9712	18.768	15.896	10.2024	13.0531	38.3091	2.8305	8.85033	11.9003	89.4252	15.8711	1.64411
chr3R:6819192..6823035	356.929	396.498	683.858	367.077	450.752	453.685	81.201	115.486	208.268	193.308	328.39	76.8467
chr3R:7729519..7737023	89.8192	65.0899	34.7111	31.3271	37.773	49.1166	79.1291	20.745	15.1983	105.233	142.834	20.358
chr3R:10097160..10104909	10.1134	9.17909	15.4762	16.723	15.8026	24.4437	163.694	71.6917	52.1221	36.006	94.7784	5.49615
chr3R:15413010..15421962	33.9932	45.2089	56.924	102.277	74.6826	64.7496	708.568	234.206	174.244	53.0844	59.2741	19.5869
chr3R:15619000..15624025	30.9861	29.4731	36.5539	27.3866	43.129	20.5916	91.3407	25.5788	18.3918	71.077	128.515	18.9565
chr3R:19706000..19711023	30.8982	29.583	36.7969	27.8718	44.415	21.0761	80.2147	25.5805	18.5385	67.9445	125.325	19.4726
chr3R:22290167..22296611	51.7303	50.7473	50.1544	58.1367	32.3554	47.6177	125.215	28.7894	19.1882	118.076	16.2636	2.83213
chr3R:29213303..29222023	104.771	92.0788	102.25	208.026	177.792	105.691	130.262	171.678	110.058	41.004	71.1655	35.868
chr3R:30680000..30685022	30.8766	29.5192	36.7395	27.834	44.3901	21.0482	78.0049	25.272	18.2744	67.8346	124.84	19.3654
chr3R:31998006..32004021	30.6689	28.6903	34.2517	24.9475	39.9622	18.8846	85.5429	24.5408	17.7574	66.7597	124.825	17.6719
chr3R:32067004..32079333	681.56	334.83	228.547	793.528	676.637	1017.56	459.105	76.2724	55.1484	38.538	369.417	60.6345
chr4:320042..328026	85.5623	66.6026	34.5076	30.9913	37.2902	47.8721	73.8945	20.3803	14.8912	98.5121	133.266	20.4597
chr4:1302001..1310008	66.0334	137.862	155.349	90.389	58.0742	96.3897	89.323	84.439	58.8975	43.0166	273.91	162.079
chrUn_CP007073v1:1..6016	57.2649	38.8414	27.6332	19.1501	29.2559	31.6824	20.6638	192.768	140.376	36.0938	42.2833	62.8019
chrUn_CP007080v1:1..2115	156.711	251.511	252.589	241.007	214.148	238.769	753.753	197.128	140.238	597.474	479.508	43.3831
chrUn_CP007120v1:2003..7007	64.1826	63.1869	58.6309	63.1311	89.2968	85.3192	59.3879	89.5699	80.2034	52.2117	143.56	107.324
chrUn_DS483763v1:4..6546	241.246	173.473	122.865	156.729	216.45	99.3039	47.2949	88.398	66.9709	116.9	72.5633	5.26583
chrUn_DS483793v1:14..5465	150.556	37.2261	13.5912	9.99006	359.042	1.87958	237.284	0.730975	0.504995	153.111	7.67518	0.92957
chrUn_DS483832v1:1..4705	47.2148	47.487	28.1357	26.3678	13.974	35.4606	150.021	240.362	177.253	44.9606	117.625	162.225
chrUn_DS483870v1:1..4231	475.181	342.187	265.232	352.715	446.995	197.379	49.4978	122.843	93.1303	205.807	115.194	6.04772
chrUn_DS483918v1:1..3819	38.0991	59.7402	34.4444	26.8896	11.6037	37.8368	171.424	114.062	77.5196	17.3442	54.9179	153.27
chrUn_DS483930v1:1..3716	221.287	2.45	15.3467	7.39296	278.844	1.15487	245.108	0.718724	0.515044	93.9271	2.62718	0.41847
chrUn_DS484015v1:1..3234	444.995	284.965	207.909	336.944	419.214	164.364	49.4624	111.469	85.3098	203.156	114.182	6.18861
chrUn_DS484068v1:1..3013	17.4434	72.7566	44.6825	9.85004	4.32181	147.436	37.9656	15.3972	10.0559	19.4153	46.269	288.53
chrUn_DS484106v1:18..2884	37.6755	67.9277	45.7854	5.45628	2.15947	9.14785	7.8629	180.781	127.774	54.9983	110.083	248.415
chrUn_DS484180v1:1..2697	48.2392	80.5077	32.735	37.9391	12.2572	49.4669	352.311	199.948	138.486	38.4851	137.536	387.527
chrUn_DS484183v1:1..2688	57.6698	59.6342	34.9225	38.5832	20.6506	46.3048	160.862	262.989	196.593	52.0052	142.368	208.568
chrUn_DS484312v1:1..2382	67.9264	75.8667	45.6581	54.6806	31.3054	54.648	151.861	245.51	180.909	64.3264	133.482	315.26
chrUn_DS485820v1:5..1045	227.585	359.534	279.441	245.004	349.347	386.913	60.3997	226.391	262.701	250.698	1023.61	86.978
chrX:48006..108017	33.4064	58.2874	56.8027	54.5197	21.2921	71.9645	96.1229	125.773	89.2817	87.3654	121.064	132.263
chrX:119001..133022	24.4871	26.8001	36.501	55.877	28.5895	321.558	20.4049	89.2245	64.1604	33.252	32.9581	27.2552
chrX:1955000..1963516	78.3844	58.2587	31.8575	28.3691	34.4196	44.8871	73.894	18.8112	13.7333	93.7019	128.823	19.6976
chrX:6527232..6536019	155.581	170.923	127.118	7.14397	37.9471	169.801	7.42653	5.56466	4.74593	23.1025	9.96743	1.55448
chrX:7023152..7031932	60.0044	43.8558	29.7204	22.0335	31.3146	34.634	21.8903	184.675	134.814	35.4006	43.8033	67.7608
chrX:8292784..8296775	9.99229	329.403	262.876	53.3648	13.6938	252.962	18.5589	7.46024	5.7258	133.952	19.136	10.0867
chrX:9087010..9095988	34.8429	46.3956	59.2856	103.275	75.35	65.4886	714.515	239.547	177.351	53.674	59.631	21.9099
chrX:11193515..11202842	173.924	31.5612	88.7227	72.7645	91.2596	127.095	13.1876	222.429	163.557	15.2641	18.6983	123.144
chrX:11312119..11319026	76.684	56.5388	32.5483	28.4966	31.8782	45.6351	69.7836	19.9201	14.5824	97.4584	122.532	19.1663
chrX:15503021..15514001	156.485	167.193	187.747	221.573	115.646	120.603	177.922	219.129	165.822	111.341	1624.19	34.4788
chrX:21518011..21559942	359.148	200.005	234.963	173.429	113.365	144.963	387.908	248.365	188.657	257.125	245.291	176.625
chrX:21631186..21676025	137.21	125.145	141.534	109.234	132.552	167.416	134.816	202.42	146.064	221.159	256.787	99.6704
chrX:21710001..21738026	91.2144	82.838	84.7976	52.0852	61.6124	89.5381	92.369	81.7954	59.0307	121.585	137.662	66.3881
chrX:21746000..21774024	109.284	50.6448	82.9608	64.2325	75.3867	91.7622	99.7524	181.83	133.16	130.998	134.163	93.5683
chrX:21780000..21792008	26.5589	69.7937	75.9171	56.863	84.6815	93.8889	110.785	114.189	83.455	144.758	146.486	69.6796
chrX:21798000..21820025	49.897	69.6728	67.4712	56.5387	77.6036	87.7852	62.789	139.371	101.289	101.312	104.364	79.2615
chrX:21835000..21845017	103.635	10.1369	50.9324	56.3031	51.8203	76.6964	21.3122	69.3026	50.0192	44.4749	142.424	31.4583
chrX:21872001..21881023	23.6833	66.5614	85.4251	63.7883	99.7244	111.34	81.9445	117.35	84.6055	147.085	137.036	72.7197
chrX:21981000..21988024	21.7818	66.1494	81.3247	56.2982	88.6863	103.189	68.3701	102.045	74.5387	107.662	116.984	74.0281
chrX:22020012..22032026	104.875	130.393	107.957	114.818	104.156	129.103	84.1531	64.7965	46.1916	98.4727	77.8517	110.968
chrX:22056007..22065023	93.2631	118.546	95.6604	102.761	93.1503	114.941	78.827	58.2189	41.5624	91.4561	73.3034	108.2
chrX:22094000..22110022	98.965	122.409	99.6399	91.2298	80.718	106.108	91.3091	74.1335	53.1123	95.7243	77.5251	115.339
chrX:22122019..22131027	112.116	68.9152	91.7887	72.7114	75.5504	97.4421	38.0159	99.1835	70.0563	26.5881	34.8409	60.8566
chrX:22253002..22263017	64.2765	51.7306	75.74	54.0512	82.3448	66.7187	86.7955	46.273	33.2438	125.994	60.4123	79.9757
chrX:22271001..22282923	168.97	163.411	188.782	166.088	159.273	175.498	154.384	117.907	85.2317	140.877	102.565	306.51
chrX:22352000..22360023	113.958	106.471	126.105	139.989	123.9	126.196	102.779	86.9827	62.1374	91.2818	68.6287	174.538
chrX:22368000..22379014	136.62	120.981	151.079	128.24	148.575	132.337	146.289	95.9351	69.379	211.734	128.529	136.788
chrX:22394000..22403025	106.514	141.608	152.368	144.008	125.232	163.446	117.063	109.018	74.9545	184.87	141.008	75.3017
chrX:23324000..23331022	103.162	165.931	120.986	108.302	93.0967	134.015	89.3367	116.844	80.5944	140.381	106.813	46.3078
chrX:23469000..23478024	62.8284	78.4766	86.0587	91.8176	121.076	106.285	31.0101	93.8381	88.66	53.1672	248.017	81.4813
chrX_DS483648v1_random:9001..13933	47.0217	66.0032	87.4777	84.0098	142.051	99.5991	30.959	96.9287	86.7334	66.4901	127.036	45.8009
chrX_DS483655v1_random:9184..13549	155.999	158.642	214.935	165.416	153.108	151.637	200.554	112.293	79.6871	273.365	159.165	291.91
chrX_DS483803v1_random:6..5010	55.1883	28.431	59.5749	67.5729	75.5639	53.5624	71.3853	42.8194	31.4509	42.6445	42.1756	114.997
chrX_DS483818v1_random:2..4915	50.2182	12.282	38.781	53.1674	59.409	36.3925	90.1756	40.7024	30.0932	38.9237	55.374	202.878
chrX_DS483955v1_random:12..3553	65.8286	29.9591	50.5667	44.2965	49.5603	39.3255	78.2643	35.2142	26.1711	48.9826	47.3208	173.936
chrX_DS483971v1_random:1..3475	97.5969	113.613	186.469	203.448	164.809	229.599	53.0821	59.9627	42.1526	105.591	85.4814	33.995
chrX_DS484057v1_random:3..3074	110.249	131.137	118.359	120.471	139.573	140.149	60.3633	77.5589	59.2266	106.318	187.144	202.197
chrX_DS484075v1_random:3..2998	227.013	228.539	260.321	238.041	215.455	269.002	204.628	139.633	102.463	188.404	124.447	491.883
chrX_DS484519v1_random:17..1963	402.595	591.413	673.494	639.81	869.719	863.05	180.398	524.322	491.605	288.954	1667.53	336.063
chrX_DS484974v1_random:1..1300	294.35	314.777	321.504	194.459	175.961	242.32	203.311	93.7556	72.5425	162.127	106.491	567.61
chrX_DS484990v1_random:1..1300	242.633	354.147	230.402	238.234	260.838	259.436	183.791	130.382	90.6339	166.419	140.303	593.646
chrX_TAS:1..9024	1363.17	669.564	485.244	903.071	913.992	1660.84	157.997	31.0476	22.3567	46.7438	168.796	27.2011
chrY:132051..137253	82.2098	58.3993	26.8831	21.1987	30.2923	32.8177	65.3494	19.1543	13.9815	82.9282	125.656	15.7427
chrY:730001..735973	30.5639	29.5346	35.4872	26.1351	41.7924	19.571	80.34	24.6313	17.8174	65.9501	123.923	18.2368
chrY:1462026..1470020	88.6726	128.474	118.145	147.317	93.5333	131.279	54.4258	44.1303	31.7429	73.1659	27.9213	5.68219
chrY:1871060..1880024	83.6517	117.451	108.925	139.737	91.1093	123.144	52.2299	42.5535	30.532	68.6347	27.2202	5.3768
chrY_CP007111v1_random:1..31022	91.9026	379.719	46.0071	47.7792	269.917	1.79853	91.5177	1.42763	1.07449	64.3095	23.6538	1.27811
chrY_CP007114v1_random:21981..27025	47.187	41.8398	71.1351	50.4867	56.7024	90.5146	163.741	36.5806	25.3003	150.896	89.7767	54.7822
