# Supplementary material for: Rapid evolution of piRNA-mediated silencing of an invading transposable element was driven by abundant de novo mutations
Source: HighWire-hosted journal article supplement (doi:10.1101/gr.251546.119), 2020-04-01
Supplement: Supplemental_Table_S3.xlsx [file Supplemental_Table_S3.xlsx]

## Sheet: Sheet1
Table S3. Annotated 497 ancetral piRNA clusters and their expression levels. For each piRNA cluster, the chromosome location is indicated. For example, chr2L:1..7020 represents the piRNA cluster which is located at chromosome 2L and starts from the coordinate 1 to 7020 (based on the dm6 reference genome). Expression levels are measured in RPKM (Reads Per Kilobase per Millon mapped reads). Informa…
cluster	21147	21183	21188	21213	21291	21346	w1118_1	w1118_2	w1118_3	w1118_4	2057	cn bw
chr2L:1..7020	88.2911	34.9944	39.1389	47.1711	73.2935	37.9258	12.8917	1.3978	0.996791	77.0533	55.9945	79.611
chr2L:347572..356987	22.1586	22.1489	25.8563	18.9007	30.0159	13.3911	62.2051	17.7967	12.8388	46.1478	89.1431	12.4238
chr2L:1219182..1229021	21.4311	20.7903	24.0299	17.5311	27.7633	12.5115	62.2884	16.9525	12.2083	45.1056	87.0159	11.6301
chr2L:1677430..1687013	21.8882	21.2974	26.7364	20.6705	30.2414	12.9779	60.3229	17.3113	12.5048	44.5077	87.9958	12.236
chr2L:2112171..2119004	35.9305	57.2673	39.869	39.4598	26.8712	21.2213	73.6141	39.9087	28.628	37.4711	17.8853	36.3888
chr2L:2564886..2571608	81.4828	29.6485	31.5267	56.8094	44.2957	11.4019	65.4915	40.6715	29.9666	22.6242	19.0178	26.3295
chr2L:2771275..2779180	88.9372	25.5591	29.7042	62.5492	48.9141	10.8023	57.4929	37.043	27.0925	19.4835	16.6741	22.9608
chr2L:4453162..4461990	43.661	69.4549	54.7438	5.26543	14.9967	141.521	13.5352	9.29552	14.218	390.802	9.16874	3.88326
chr2L:4662003..4668027	38.3363	60.605	42.5005	42.5032	28.5353	22.6816	77.2694	41.5728	29.7007	38.5072	19.1507	38.0182
chr2L:5237044..5244973	7.16146	4.03059	9.81547	2.01352	6.29165	8.35556	92.9318	55.3356	56.8154	2.31644	23.0509	0.822564
chr2L:7976711..7984025	96.9398	27.6276	32.4803	67.6075	52.9426	11.8255	68.3684	41.7275	30.5163	21.8683	18.2306	25.6825
chr2L:8254011..8262679	6.60923	6.16652	9.75557	15.0119	12.37	13.704	1024.6	67.3868	48.5034	149.263	63.9923	1.18421
chr2L:8595001..8601525	104.03	25.6964	30.5239	70.1023	56.0638	11.7942	51.258	41.4688	30.1865	18.7148	16.1859	20.2839
chr2L:8678201..8684042	14.8875	7.16259	20.3052	4.52034	13.7895	17.49	222.374	159.862	154.93	23.764	55.4482	13.7581
chr2L:8723173..8731025	28.501	2.54084	5.72223	3.30296	4.64154	5.23726	27.4087	2.54401	1.85835	0.00435207	74.3261	0.0105515
chr2L:10156013..10164150	25.7315	25.0257	29.0121	21.046	33.4303	15.0106	76.1918	20.4815	14.7647	54.4426	103.916	13.9939
chr2L:10593001..10599020	38.77	61.4493	43.0262	43.1183	28.8918	22.9931	77.1103	41.7378	29.7958	38.3982	18.9125	37.7682
chr2L:10876589..10883601	99.4948	29.4447	34.3386	70.3709	54.6511	12.4892	72.6394	44.1561	32.3153	22.9568	19.5194	27.2656
chr2L:11539206..11549999	48.3551	35.8235	23.8196	17.5984	24.991	27.7613	17.8419	147.681	107.607	28.9709	34.9749	53.6483
chr2L:11713427..11721232	26.5415	26.5358	31.0188	22.6322	35.9808	16.0733	74.7509	21.3302	15.3757	55.777	106.887	14.9622
chr2L:12067376..12074023	100.927	27.3157	31.3644	69.5617	55.6943	12.0133	61.9944	42.0617	30.6317	20.2086	17.538	20.8754
chr2L:12933572..12941556	25.9919	25.9935	30.2873	22.1991	35.2333	15.7098	72.2027	21.0282	15.18	54.6598	104.075	14.584
chr2L:14986000..14991984	37.5691	59.071	42.2336	43.0262	28.9364	22.7173	76.7841	41.1737	29.3093	36.4513	19.1541	37.7916
chr2L:15444802..15454944	20.7088	20.0698	23.2159	16.9795	26.8153	12.0727	59.6867	16.3421	11.7876	43.5266	86.2129	11.2212
chr2L:15586460..15593464	112.766	29.6164	33.8988	85.1999	82.1069	12.4976	65.9947	44.0708	32.2639	21.2762	19.4837	28.2087
chr2L:15825174..15830897	29.8423	25.7022	15.398	12.8663	16.8855	19.062	11.5554	77.661	56.8118	16.8502	22.1092	29.7727
chr2L:16154000..16161421	93.3487	25.4282	30.0015	63.9272	50.8611	11.1606	59.0206	42.4615	30.7481	19.3649	16.6851	19.915
chr2L:16694112..16703026	857.96	791.977	882.786	2112.79	1577.67	1034.8	1342.97	225.057	161.355	206.718	348.024	9.55082
chr2L:17145002..17151006	39.2007	62.6754	43.4958	43.6127	29.5307	23.1619	76.7301	41.5937	29.7489	37.2669	18.3638	37.7085
chr2L:19146174..19154025	85.8741	21.8298	26.1459	58.6333	47.1484	10.0227	44.9964	34.6422	25.1309	16.4741	14.7862	17.0856
chr2L:19345007..19357026	35.2367	28.4387	35.1794	31.9543	33.1313	23.3817	67.0291	23.9586	18.1123	45.1038	80.3554	16.2772
chr2L:19565043..19574879	24.8657	26.2219	37.0985	60.3393	43.8625	38.7528	4187.86	384.376	262.728	275.885	223.089	5.48287
chr2L:19658000..19664024	38.9859	61.9844	43.2728	43.1968	28.914	23.1124	78.2365	41.9475	29.8919	37.7846	18.61	38.7125
chr2L:20006000..20011024	22.366	21.8582	47.6603	18.4225	22.8569	31.6493	22.9955	45.725	32.6341	35.8972	66.2478	6.22159
chr2L:20101023..20120957	46.2278	141.168	280.744	62.9213	40.2025	187.885	215.343	77.7987	55.2961	145.93	279.711	75.779
chr2L:20144033..20224857	134.033	62.9659	116.921	97.8717	70.8986	100.58	199.227	51.7047	37.2343	81.1833	166.376	52.8257
chr2L:20302169..20312392	20.2698	20.3057	23.9645	17.3183	27.4886	12.2969	57.2788	16.3483	11.8034	42.6812	83.4687	11.4768
chr2L:20408000..20413014	21.4467	21.9777	48.2156	18.2857	22.4719	32.531	23.1448	47.7487	34.0972	35.4033	67.6628	6.04424
chr2L:20575380..20585014	22.0588	21.6842	24.8076	18.0936	28.0561	13.059	60.9872	17.3681	12.5432	44.6775	86.9561	12.0796
chr2L:20740295..20748025	29.3897	2.70734	5.88427	3.35677	4.40855	5.6651	29.7044	2.83844	2.08872	0.00459158	75.8411	0.0110209
chr2L:20976717..20981432	64.5457	121.931	133.229	90.7021	79.4456	153.856	108.788	98.8205	70.5485	100.617	63.5746	43.9985
chr2L:21040415..21049963	63.366	4.19834	12.2732	5.85509	8.59518	10.5917	50.7541	3.93055	2.95909	0.0143287	58.5438	0.0197721
chr2L:21345355..21355265	21.0259	21.0305	24.6159	18.012	28.6298	12.8274	59.4974	17.0721	12.2518	41.9566	83.639	12.1524
chr2L:21406000..21414023	58.0507	47.0632	51.1788	72.8631	58.1671	63.1023	59.4633	40.9156	29.9597	57.9298	39.3682	20.2651
chr2L:22256079..22265019	58.6891	49.0245	62.5153	65.0107	62.767	64.6198	70.4432	68.6022	49.703	66.5835	39.3583	46.3177
chr2L:22395011..22407023	56.5246	59.6653	67.7386	58.4874	43.559	83.0509	31.9863	73.4652	53.9979	58.1892	20.9607	35.2429
chr2L:22613000..22620026	65.7538	51.9574	50.4752	100.365	80.7055	52.0016	93.8013	215.427	152.44	73.7583	36.471	39.0804
chr2L:22799004..22805969	56.0916	42.6236	47.5447	23.239	33.0377	39.5108	15.9003	15.287	10.8314	73.653	25.9272	8.80387
chr2L:22895000..22913026	67.3804	81.6523	76.2014	73.1932	54.9849	69.1138	48.786	61.579	44.1701	60.2206	40.6384	48.2412
chr2L:23084008..23096024	84.7048	48.3633	53.1145	75.6076	70.1143	45.2138	96.6451	85.529	62.1615	51.5824	43.5754	50.5359
chr2L:23182000..23188018	82.5205	76.708	68.1175	82.0912	58.0988	85.8788	85.6381	124.403	87.8081	76.7833	66.4204	40.5452
chr2L:23222004..23246024	69.7043	143.199	113.227	98.2013	61.622	134.236	77.6696	94.3455	67.8528	98.0383	59.3048	45.7195
chr2L:23328000..23337026	12.225	554.864	557.734	14.2799	10.9818	471.479	14.6676	10.99	7.81424	15.2076	14.4528	310.273
chr2L:23469000..23477025	49.1918	64.4872	61.0025	42.169	30.7764	59.512	34.6358	35.7492	25.3087	25.4873	29.4818	28.7988
chr2L:23486001..23496025	71.1809	50.3519	49.0684	70.8876	48.2068	44.6002	46.6275	58.4108	42.6774	30.9239	26.3785	21.7609
chr2R:1..14026	14.2611	40.1396	26.3139	10.0189	4.95923	81.2969	24.2449	10.1925	6.46439	17.2663	32.6794	114.007
chr2R:42000..56026	83.7387	85.1842	86.9041	55.9601	70.3643	89.2937	44.5199	62.6145	44.9502	40.7249	42.5347	33.4249
chr2R:82001..95028	79.0028	97.5851	87.3556	85.3499	65.264	83.3464	54.2596	59.3352	42.4891	66.17	44.3961	43.1243
chr2R:299003..321016	101.318	122.925	124.183	156.633	107.476	129.447	53.4256	47.3236	34.2743	63.695	29.3698	8.46463
chr2R:335005..345982	36.7138	31.3617	30.8978	25.576	33.6036	17.8219	62.5709	24.7731	17.5259	44.1442	81.3276	13.2801
chr2R:424005..432997	81.7542	72.1851	74.6731	48.0157	66.3838	71.2348	31.8859	57.102	41.0514	31.6629	30.5251	14.237
chr2R:697003..706001	78.1024	23.3202	28.2767	56.6598	45.3241	11.2162	53.1138	33.9906	24.8222	19.5135	16.3303	21.9358
chr2R:712001..725025	91.4318	102.091	103.623	105.32	86.1465	94.9699	58.2385	54.9595	39.6703	51.8727	40.5094	26.9473
chr2R:732003..740666	22.5722	47.1365	35.0992	33.2124	20.1461	71.7759	27.3778	14.8369	10.6806	29.3881	13.6585	6.28944
chr2R:749031..758028	71.71	83.8987	81.0671	89.3129	68.2152	77.6348	56.8681	59.2086	41.9655	74.3745	45.4005	44.1295
chr2R:847045..854001	56.1648	42.6812	47.599	23.2624	33.0752	39.561	15.8752	15.2273	10.7866	73.7379	25.9698	8.78342
chr2R:1050001..1066021	84.4316	39.9243	43.8556	103.598	90.2361	49.0661	24.3043	41.7183	29.775	44.2271	24.3444	5.89844
chr2R:1222009..1227022	58.6594	39.0367	49.7843	54.1798	45.0067	61.6685	19.2133	51.0845	36.955	16.4899	25.5354	37.7297
chr2R:1234002..1244981	25.4905	22.7117	27.8848	21.5264	30.5089	17.5457	56.7501	24.4421	17.8182	45.8587	80.4829	17.1598
chr2R:1290016..1307003	46.8236	34.7282	28.226	45.5835	44.5772	31.0282	14.6155	18.9546	13.5167	12.2323	16.4428	8.71767
chr2R:1356003..1364993	58.0248	26.4175	32.1029	62.1346	52.1972	29.1583	23.4813	33.9015	24.5474	18.506	21.4279	11.7758
chr2R:1452006..1459027	55.1432	77.2714	69.846	34.1863	20.8331	55.7464	15.2244	47.6575	35.2479	16.32	26.4731	42.5025
chr2R:1479060..1484024	74.2458	66.231	45.2902	48.5828	47.9613	71.3686	58.0433	95.5242	67.8986	69.2083	67.0851	35.102
chr2R:1491008..1498015	53.4942	66.5223	68.1042	35.5623	23.1137	53.7501	17.8056	49.9648	36.7865	16.6425	27.8351	51.1715
chr2R:1516004..1522024	33.6667	10.4537	22.9232	29.0958	18.5619	27.5498	17.471	21.4516	15.1803	42.2467	62.3354	10.4442
chr2R:1557000..1569016	67.5273	78.7778	78.4949	63.0648	44.1237	75.009	37.4811	66.4806	47.8772	45.682	37.9823	45.8422
chr2R:1607003..1633957	65.9986	86.8597	98.0647	99.7585	88.992	106.619	55.6794	61.0607	44.5262	74.2951	53.6508	23.6711
chr2R:1698000..1707961	83.0331	26.1846	27.8002	62.4276	59.6188	11.9285	46.6033	32.6656	23.9226	17.66	18.1591	22.7686
chr2R:1718000..1727005	64.6465	82.893	78.3166	42.3455	22.7207	63.1663	14.2737	49.9086	37.1945	14.565	23.6242	48.8893
chr2R:1966026..1977007	62.4843	45.8018	26.3807	23.7527	26.8756	35.1894	54.5922	15.399	11.271	71.3003	91.422	14.4265
chr2R:2018000..2035019	114.623	96.4002	109.738	70.1035	95.3499	97.4947	40.1146	69.8721	50.5263	37.2578	38.1585	16.4341
chr2R:2149000..2172023	58.5643	61.0448	49.9336	41.3892	41.5449	57.3292	40.1773	100.663	72.7062	48.2396	38.884	49.8487
chr2R:2195000..2203024	61.1569	26.074	55.8094	40.8298	50.6866	53.0171	29.1087	58.9853	42.1677	49.9585	31.3791	43.4448
chr2R:2542001..2555018	53.1411	156.102	116.539	103.562	81.5294	106.529	4.55964	39.1777	27.834	24.6744	2.67309	51.4199
chr2R:2570005..2578019	74.673	75.859	50.9617	49.4855	44.3018	68.5207	54.0466	97.4685	69.2402	80.4599	72.051	39.4614
chr2R:2661004..2666970	46.8577	43.2967	39.6896	21.1661	17.5665	22.8008	74.5208	61.0009	45.1489	22.1281	21.4875	24.6596
chr2R:2687012..2695021	49.7703	30.0637	34.8448	51.8599	43.6315	28.7646	25.752	40.4098	28.9193	34.2871	24.2777	9.86438
chr2R:2706000..2726026	42.0318	30.1233	41.0632	29.9938	32.7153	37.1797	28.0448	62.1309	44.6772	39.5644	23.4373	50.873
chr2R:2908015..2916027	80.3976	68.9647	61.528	71.0066	55.7274	78.7661	76.2216	83.4545	59.315	83.1588	55.2088	47.9429
chr2R:2982002..2989014	46.1978	66.9673	57.9797	34.0703	25.2272	52.1203	15.5895	39.0259	28.5296	16.8186	23.0365	43.2233
chr2R:3002000..3009978	77.0082	69.611	73.7412	49.4386	68.0369	69.3306	33.4519	51.5672	37.1058	33.1322	28.4001	13.5708
chr2R:3023001..3027905	60.4844	114.526	125.782	83.0604	74.0099	145.948	105.542	96.6486	68.9882	94.6007	61.7122	40.0336
chr2R:3228001..3234025	39.0564	62.1811	43.4073	42.9732	28.7818	23.1273	77.5972	41.4303	29.5752	37.4749	18.4742	38.3398
chr2R:3303001..3314016	38.2856	13.3236	26.4525	33.3769	22.3653	32.6365	20.1913	22.5594	16.0733	41.0192	67.7193	12.1641
chr2R:3386001..3392025	39.2291	62.6717	43.4991	43.5958	29.534	23.2319	77.5789	41.8468	29.8872	37.3233	18.6557	38.3707
chr2R:3504010..3516024	46.3946	35.3588	23.5936	19.1345	25.0286	26.6523	20.5395	134.238	98.0151	28.3754	32.7488	49.7775
chr2R:3615001..3624028	77.5645	80.132	71.9004	77.3174	57.6473	86.1511	81.0146	83.2693	59.1827	108.291	58.5297	63.375
chr2R:3650006..3655024	58.3394	70.1698	74.5184	38.7851	23.5679	54.6703	18.7442	54.9287	40.4567	19.0227	29.1925	56.4355
chr2R:3694021..3703026	27.4301	40.1141	35.0703	28.4376	38.0022	40.3862	32.3121	82.401	59.9538	29.3743	71.0639	42.4102
chr2R:3764002..3781022	46.9935	33.3519	40.8868	58.3093	42.6457	44.0286	33.5296	43.4877	31.7238	28.5751	20.0819	17.4611
chr2R:3801001..3808978	57.5487	41.5702	50.7657	71.3645	48.6135	53.1812	44.7168	39.4856	28.8213	34.4147	25.4592	18.867
chr2R:3868001..3875023	70.9902	53.1203	60.4474	76.4138	75.7286	68.9549	51.0604	62.6532	44.1896	47.1884	41.5971	28.1543
chr2R:3881001..3893024	47.0333	36.0794	25.06	20.8944	26.9935	28.9179	23.3551	136.209	99.2638	34.0224	34.1247	50.777
chr2R:3955002..3962998	83.6341	70.8718	80.484	49.0195	65.5481	70.8355	29.2414	56.1224	40.731	28.048	28.4697	10.6791
chr2R:4030011..4042989	65.1199	46.1765	44.7858	51.1163	54.0423	44.3039	33.388	37.965	27.6567	28.3968	28.2074	24.0599
chr2R:4055001..4067011	89.1116	39.1519	42.0492	66.0497	63.1029	35.6845	51.4527	42.3121	31.0214	29.8793	25.6556	15.4101
chr2R:4078003..4089007	78.028	34.1352	37.7486	60.8466	63.1846	38.3092	26.9908	35.6766	26.302	24.5022	19.5726	8.48542
chr2R:4175001..4182019	45.2304	64.9025	71.7009	32.8227	28.9512	63.7421	18.058	47.8883	35.5365	45.0018	32.8065	33.4597
chr2R:4245001..4253025	58.2407	59.8505	62.106	71.5685	64.6271	75.8003	64.7814	102.853	88.9358	73.9735	48.1177	44.4335
chr2R:4411012..4425736	55.5407	56.0709	55.0571	72.3685	55.7174	56.0343	41.9715	51.4202	37.0154	51.56	38.5533	26.3952
chr2R:4448169..4457013	73.6312	36.6495	40.055	59.6884	60.3856	36.5443	33.9968	40.9009	29.4292	28.3394	26.4866	11.4211
chr2R:4658231..4663921	72.2744	31.8949	30.0929	59.9779	63.4816	31.2469	24.3229	33.3354	24.0952	19.4761	22.7996	9.8102
chr2R:4853196..4888004	65.4953	76.2739	79.2021	80.8907	58.1892	91.0361	65.6324	75.5545	54.0312	70.8161	52.5727	59.8238
chr2R:5231005..5237079	73.1387	36.6771	40.8366	77.362	64.3096	37.8523	37.1079	56.8212	41.1253	24.4567	24.1987	15.4616
chr2R:5372006..5396001	41.0505	40.8278	27.247	25.6948	24.0025	25.6177	54.9755	25.5736	18.4887	51.6875	50.0775	32.0214
chr2R:5541080..5548988	85.4585	60.5002	70.441	37.3152	65.9458	62.9804	19.8583	18.637	13.3562	89.42	35.5039	12.2836
chr2R:6254004..6496026	397.201	289.738	277.459	410.621	372.373	263.587	211.128	216.167	158.094	267.051	190.326	65.0026
chr2R:6580002..6585003	21.4931	22.0322	48.2838	18.3171	22.6344	32.4295	23.1585	47.8928	34.2035	35.4284	66.6296	6.01544
chr2R:6953002..6959027	38.5852	61.2761	42.7863	42.9159	29.1472	22.7632	75.1691	41.3833	29.6106	38.2791	18.6189	38.305
chr2R:7262237..7269941	92.8465	26.9343	31.4094	64.6471	50.594	11.4596	59.681	40.5016	29.6483	20.3389	17.4743	24.8508
chr2R:7862315..7867022	22.5335	23.19	50.8899	19.1513	23.6427	33.975	24.204	50.0685	35.6973	36.2578	69.0244	6.31094
chr2R:8106169..8113567	95.0738	27.3502	31.8086	66.8602	52.2991	11.5584	61.4175	39.6658	29.0078	20.8508	18.0657	24.7181
chr2R:9551096..9556747	75.2334	56.4743	72.2823	485.36	534.523	161.294	11.0199	58.8032	48.935	29.3531	21.7111	5.7823
chr2R:10585611..10594023	29.4491	2.71402	5.82432	3.24838	4.49422	5.64072	29.073	2.65679	1.94254	0.00439207	74.9836	0.0101275
chr2R:12166005..12174999	30.5928	29.0537	48.1289	70.8716	34.2713	35.699	72.3244	52.0287	32.8603	18.3436	109.716	4.64668
chr2R:13326146..13333813	272.923	179.1	246.616	417.482	291.386	231.623	52.0003	26.4793	17.3132	385.392	155.816	1092.22
chr2R:13729000..13735784	36.1734	56.7912	39.5794	39.4013	27.4461	21.2419	74.9334	40.5953	29.0602	39.7142	17.7531	36.5051
chr2R:14143586..14146538	199.333	163.167	166.539	211.358	105.633	117.796	350.488	137.921	85.7554	9.41189	116.344	99.1183
chr2R:14618770..14626577	100.686	157.573	92.6386	62.4456	126.304	167.336	9.92352	22.6921	57.6965	913.683	125.661	13.5882
chr2R:15085029..15092928	102.242	26.4437	29.6753	77.7513	73.808	11.0161	58.0322	39.3248	28.7936	19.7845	16.8814	25.0101
chr2R:15119368..15127805	28.8018	2.64763	5.63466	3.18991	4.42401	5.36677	28.3662	2.5781	1.88714	0.0042713	73.8527	0.0108797
chr2R:15341000..15349280	29.7406	2.73394	5.87363	3.28142	4.55046	5.69398	29.1154	2.64548	1.94007	0.00446208	75.3901	0.0102889
chr2R:16215030..16224008	38.5777	17.2628	30.5744	11.5817	37.9639	33.0006	49.0071	90.6918	87.4216	10.7267	54.8352	1.735
chr2R:16827006..16835930	199.139	281.548	267.503	563.034	363.774	324.249	3388.17	384.296	285.638	149.427	1415.45	54.6901
chr2R:17779113..17787966	23.9692	28.401	46.7242	60.2173	51.3011	63.3282	67.0855	13.4452	9.65921	369.223	85.7257	24.5501
chr2R:18487247..18495664	24.4213	24.2085	28.034	20.4498	32.3106	14.4668	72.4406	19.7722	14.2614	51.9218	100.068	13.5678
chr2R:19725478..19767572	75.6837	71.5109	90.2969	58.4155	194.838	115.593	34.6791	88.3429	124.193	37.1549	150.308	11.4726
chr2R:20580257..20588994	287.047	150.145	231.664	602.53	762.325	335.184	55.8301	75.0112	58.033	1352.49	127.949	84.0148
chr2R:20602012..20610602	399.81	442.717	347.259	692.279	551.225	597.909	59.9421	92.8141	54.2846	40.1047	215.841	42.3967
chr2R:23529008..23539018	22.9623	32.4263	27.4295	23.0983	31.5287	31.9524	29.3063	70.6139	51.4272	24.3083	71.4766	49.7001
chr2R:23914156..23922696	27.7031	38.5873	34.0192	27.8689	38.2357	39.8075	34.3029	84.2689	61.3213	28.8053	75.7412	43.3275
chr2R:24147039..24155933	25.4788	36.4928	30.8176	25.907	35.2919	35.808	31.3443	77.0965	56.1177	27.1429	64.8692	39.2874
chr2R:24174010..24186194	21.7775	35.0961	26.5043	25.5894	29.9631	33.1697	23.6516	59.1821	47.952	22.0115	82.2986	31.1396
chr2R:24648000..24655807	28.5933	40.2992	34.2637	29.3671	39.4446	40.1343	33.6728	87.0613	63.4333	30.2222	71.3675	43.1808
chr2R:24762035..24767843	15.0116	6.9213	6.80466	12.5481	9.2302	8.10534	31.2458	8.79349	6.06545	29.9633	58.7355	6.22324
chr2R:25249234..25286929	105.8	90.4798	92.1975	101.021	104.231	135.676	102.514	137.729	98.7282	79.2217	107.911	128.204
chr3L:1..21784	84.6292	28.719	36.7319	46.5192	80.4711	37.5435	7.75451	0.649895	0.469721	72.0166	66.1894	95.2368
chr3L:28001..39020	0.503128	3.65894	76.9165	44.4451	5.41561	81.1571	4.57393	2.03671	1.48333	2.04158	6.01369	2.33369
chr3L:55009..75957	166.058	0.36568	0.144802	0.275115	0.338297	0.189497	1.36565	0.759391	0.415071	12.1745	0.175283	6.3124
chr3L:403001..409744	102.244	27.9999	33.0782	70.5351	56.0452	12.3601	70.3666	42.4173	30.8824	21.988	18.6896	21.5582
chr3L:638015..646696	737.986	933.483	949.491	1668.77	1059.69	841.583	2574.87	659.677	395.247	245.024	3554.96	125.501
chr3L:858032..866967	27.2485	2.5133	5.34672	3.02931	4.23934	5.13046	26.8586	2.45688	1.79514	0.00915135	70.1821	0.0102733
chr3L:1047407..1055754	27.2341	39.311	33.8738	27.9924	37.654	39.1735	35.5323	83.9928	61.2584	30.6456	74.4331	38.9146
chr3L:1218624..1227023	27.3107	38.2869	33.3214	27.7698	37.6542	39.0753	33.6112	83.5273	60.6806	29.3696	72.5336	41.0406
chr3L:1376001..1385000	28.6589	17.2623	33.3459	14.3669	24.1996	33.6077	101.833	84.8142	81.0443	17.144	32.6769	2.28727
chr3L:1393074..1405607	41.5735	24.849	48.0981	20.9126	34.9017	48.2984	158.36	109.076	105.328	28.7593	46.2715	6.39015
chr3L:1424832..1430319	102.615	97.1779	90.4349	104.968	77.0083	112.018	104.589	103.214	73.5843	157.153	80.8573	44.2574
chr3L:2927894..2936023	28.7887	2.64103	5.67078	3.25887	4.51481	5.25644	28.875	2.50729	1.83398	0.00420379	72.4354	0.01048
chr3L:3061011..3070018	27.6468	2.55608	5.47401	3.0483	4.22017	5.31856	27.6484	2.52895	1.85899	0.00749594	71.4105	0.0101912
chr3L:3218020..3224735	38.3268	32.4926	41.1012	11.38	31.0964	53.6241	18.8143	13.555	13.3113	38.7713	28.3119	34.4462
chr3L:4327638..4336023	27.2418	38.0237	33.0481	27.6277	37.4294	38.5439	31.9378	84.7236	61.6283	28.5875	68.5208	40.4691
chr3L:4451975..4456695	64.8971	122.556	133.505	90.5784	79.1464	153.251	110.598	99.6018	71.1349	98.2131	64.8017	42.7837
chr3L:7794001..7802000	87.0887	23.9762	28.1631	59.7864	47.423	10.576	52.9424	36.6606	26.6985	17.8595	15.3494	18.6933
chr3L:8498135..8507882	21.5026	20.8769	26.256	20.341	29.8086	12.7935	59.0197	17.0818	12.31	41.9442	84.6274	12.0609
chr3L:9076148..9084965	26.8071	37.5018	33.1032	27.1234	37.1935	38.5037	31.7029	82.2308	59.9383	27.6177	72.3958	42.0308
chr3L:9533434..9541026	30.3033	42.0975	36.7038	30.8631	41.6567	42.9811	35.4533	92.4513	67.1815	31.6276	76.0372	44.9897
chr3L:10364054..10365308	146.308	86.6348	101.951	312.138	481.752	296.156	6.0552	32.5999	26.4513	2.82576	50.1658	17.0254
chr3L:11564001..11572029	28.0129	39.3577	33.5519	28.4842	38.1771	39.298	32.9352	86.1059	62.7644	29.922	67.0321	39.285
chr3L:11773014..11777484	5.8792	8.69792	9.71305	9.1145	3.92721	8.92627	0.533233	18.2498	10.91	18.4319	80.7852	0.17673
chr3L:11822856..11828660	6.38218	16.2393	15.0242	8.26642	11.0248	12.3319	12.684	10.2727	7.87406	23.3329	13.8013	140.06
chr3L:14312108..14316837	65.5154	123.588	135.079	91.2642	80.0104	154.87	111.477	100.009	71.4036	98.1108	64.6685	40.9954
chr3L:14823481..14832850	69.7938	50.8851	27.9721	24.8647	29.3717	39.0487	60.5543	16.6047	12.1131	80.845	106.189	15.795
chr3L:16184190..16188910	64.7625	122.721	133.766	90.8343	79.5091	154.035	110.353	98.6122	70.4121	97.3564	63.4151	40.5175
chr3L:16615017..16622869	78.9038	18.5191	24.4888	56.4005	44.5832	8.61756	55.8905	30.6609	22.3816	19.2249	15.9719	20.547
chr3L:17517000..17525934	26.0767	37.9155	32.2912	26.2361	35.6674	37.1532	31.9214	79.7873	57.9517	27.3945	68.0394	40.3033
chr3L:18710814..18718712	84.8292	68.1353	37.3372	33.9721	41.8656	51.7367	85.0271	20.8391	15.1848	115.053	150.582	20.9534
chr3L:19820067..19828909	26.6225	37.174	33.1419	27.0789	37.1624	38.4808	32.1864	81.257	59.098	27.7535	72.2919	41.221
chr3L:19860036..19870006	112.345	54.3659	47.9164	53.9104	63.6191	88.7863	22.1338	47.769	35.582	63.1124	44.4224	70.4138
chr3L:20477000..20484025	39.2077	83.4811	90.7251	33.2154	35.5616	95.1854	33.6666	41.248	29.4197	95.9353	103.705	69.5953
chr3L:21015000..21023402	29.1605	2.71499	5.80724	3.25054	4.49794	5.60974	29.2208	2.65495	1.94292	0.0043973	73.3564	0.0104183
chr3L:21242985..21251028	28.2668	39.9596	34.0748	28.4858	38.2942	39.6169	33.2555	86.333	62.7098	29.9455	71.5232	40.2606
chr3L:22554263..22563475	22.1126	21.6999	27.2509	21.0099	30.5124	13.003	62.2288	18.3483	13.267	46.5277	89.7632	12.2437
chr3L:22616249..22626483	20.4176	19.7634	22.808	16.6642	26.3804	11.9617	60.4381	16.5883	11.9528	42.4999	80.9633	10.9732
chr3L:22805000..22811022	38.4532	61.8073	42.8085	42.9452	28.689	22.8226	78.3236	42.5556	30.4011	37.7972	18.565	38.8678
chr3L:22989908..22996833	101.254	29.209	34.2389	70.5026	55.6542	12.4581	65.0591	43.604	31.8612	22.5193	19.1386	27.0542
chr3L:23102158..23108012	13.5303	49.4884	55.4213	45.8126	66.0119	14.5532	26.9237	42.5719	29.7419	25.6331	21.6323	62.2087
chr3L:23289012..23318929	113.678	140.517	121.292	165.623	122.293	138.959	150.564	257.361	185.948	145.216	59.0589	57.8326
chr3L:23373000..23380019	35.6375	56.3602	39.2236	39.0896	26.8411	21.3097	71.534	40.8726	29.1471	36.0983	18.2626	35.1909
chr3L:23385022..23392023	34.6348	55.5773	38.503	38.3429	26.06	20.4693	72.0204	39.8883	28.6269	36.0566	17.5253	35.7867
chr3L:23458027..23467024	83.7574	75.2191	60.8539	76.8277	59.7753	101.437	55.6559	85.7368	61.0305	75.1341	34.9868	34.3519
chr3L:23497000..23503003	52.9847	75.9512	69.2001	35.8201	22.9628	59.1016	15.7352	52.6436	38.2379	17.589	26.4195	51.9162
chr3L:23549084..23554933	48.5481	39.7371	43.9925	23.2999	38.026	41.0664	17.4772	17.342	12.2881	72.8477	26.7713	9.75627
chr3L:23571184..23578027	43.0246	67.4713	56.4694	30.4902	18.7302	59.1698	17.7127	45.501	33.232	16.7319	26.5681	66.5327
chr3L:23672004..23678025	55.2903	78.4877	71.1207	35.5881	22.5126	57.9943	20.6176	56.3273	41.8542	22.6117	26.4239	53.1768
chr3L:23914011..23925024	21.7012	50.1416	61.4737	47.0914	68.8774	78.1142	54.8937	70.2438	51.2142	74.7531	85.9666	47.3405
chr3L:24273000..24279024	38.5216	62.1724	42.9789	43.2877	29.3039	22.9481	76.0578	42.2721	30.3117	38.2891	18.5524	37.5862
chr3L:24301000..24310027	37.8509	63.7684	56.4582	48.2983	33.244	101.773	50.8696	37.0228	26.8479	29.6396	23.5746	17.709
chr3L:24420022..24427025	55.2763	35.6283	37.0457	47.4654	37.0444	57.048	51.4391	46.821	34.28	43.241	33.816	21.2013
chr3L:24438125..24455025	67.0277	36.471	42.4279	72.7777	62.4541	45.3661	28.2361	40.5923	29.1456	48.1261	37.19	7.97562
chr3L:24473013..24489002	54.6115	39.4079	32.6605	37.2816	30.5122	56.6447	46.1518	59.446	42.7024	43.6679	38.592	26.2411
chr3L:24548007..24573000	60.2282	99.5231	68.2467	66.513	103.578	93.1337	21.0143	39.9084	28.7572	54.3976	19.33	40.3483
chr3L:24597004..24603008	53.9985	98.951	107.439	71.9342	63.1352	124.758	93.6933	84.9159	60.5696	81.7048	53.0625	39.176
chr3L:24639000..24651020	14.1577	12.3457	7.86404	6.11845	2.94087	10.5901	37.4114	25.9548	17.2161	4.5709	10.3711	57.328
chr3L:24659002..24673020	49.6897	51.249	52.1232	49.4141	47.8774	44.6162	82.381	50.0351	35.7593	48.0764	32.5418	42.6104
chr3L:24685000..24695022	60.353	80.1823	84.1417	63.9633	55.0065	101.701	95.316	83.5012	59.5341	84.2546	47.2417	56.5018
chr3L:24794000..24805019	59.0518	46.6618	55.2488	53.1484	41.6236	71.7663	37.6961	54.9784	40.2341	61.8675	38.788	31.477
chr3L:24841007..24847018	49.9406	41.3232	41.2632	67.351	48.3315	60.7069	35.9532	38.9848	28.4545	52.3778	19.4262	29.8891
chr3L:24870030..24876894	31.3492	51.154	50.5327	64.8252	50.9789	36.632	23.763	43.7609	31.286	50.1445	15.2432	18.853
chr3L:25014001..25021024	62.8927	72.6524	64.1599	70.3322	51.9055	74.7828	64.8288	77.76	56.0964	73.1574	47.8366	43.4716
chr3L:25060001..25065024	30.4061	70.1906	66.6444	99.0811	73.0369	43.6284	32.0138	71.9182	50.9409	72.5046	22.8078	26.7994
chr3L:25129019..25142021	60.3544	77.6573	74.7993	65.2207	48.3294	68.8552	46.6898	67.1157	47.7586	94.4064	75.9264	52.2389
chr3L:25246000..25252025	56.4407	57.7434	60.5385	71.5443	59.6796	58.5292	50.0927	49.2886	34.7913	63.4322	35.9202	39.2394
chr3L:25283011..25294016	27.4468	22.4457	38.5581	30.5898	31.9761	47.0811	79.8002	21.6931	15.1065	72.3691	43.8921	28.2609
chr3L:25368026..25374020	36.8075	14.5507	28.0373	33.263	22.2008	31.5641	21.0815	25.1432	17.8939	40.2373	59.9727	13.4819
chr3L:25380001..25389024	55.5253	72.1713	66.9842	36.5379	24.8748	53.5208	19.9826	49.3462	36.4178	19.7216	26.645	40.4784
chr3L:25608017..25621023	214.973	138.306	142.492	321.141	323.949	158.048	247.479	126.431	92.0247	170.173	152.961	46.0459
chr3L:25778000..25783995	52.4544	64.4234	67.5187	32.4512	23.0819	53.7516	18.0707	54.3346	39.9624	21.286	28.986	53.1711
chr3L:25833019..25837972	78.3511	56.1378	54.7942	45.0982	39.0108	44.4028	38.7531	63.2498	46.8922	25.2009	25.5481	30.2444
chr3L:25917000..25922998	67.5978	46.4191	46.0911	41.4145	30.7607	32.2713	35.7994	65.5053	48.6435	39.9608	20.9423	30.1222
chr3L:25991000..25995847	58.1141	71.8365	73.5452	35.6097	24.3988	58.8099	17.6481	53.9814	40.0228	17.2911	29.1056	58.2761
chr3L:26021009..26031023	82.136	107.211	99.0387	117.811	101.824	129.882	24.3137	126.047	90.5708	86.6053	30.2073	60.9702
chr3L:26058003..26129022	63.1999	132.902	124.214	156.56	103.92	119.829	57.1062	108.911	78.529	92.3012	40.0023	49.7949
chr3L:26149001..26159018	67.3738	64.7332	72.0095	58.1441	61.9035	86.148	32.752	79.1563	56.7746	34.1598	32.5289	41.8536
chr3L:26171013..26177021	59.6834	78.5948	74.169	37.8665	22.4842	60.2496	16.2896	50.735	37.558	17.5908	27.0995	53.7445
chr3L:26238010..26245979	64.913	46.4668	43.8566	34.3608	25.7558	30.3633	30.6151	53.877	39.0154	33.0396	18.9357	30.6506
chr3L:26388001..26394023	38.4623	61.8354	42.784	42.9826	28.6956	22.7975	78.1988	42.4648	30.2701	38.2257	18.631	39.583
chr3L:26465001..26473023	82.3086	64.5362	64.7711	70.2675	61.0013	58.368	41.4724	64.9689	46.7691	53.105	39.2037	6.59298
chr3L:26496001..26501868	56.9489	67.2983	57.5655	41.0854	26.268	62.1294	17.726	37.722	27.3331	19.1468	23.592	36.8494
chr3L:26568011..26583993	128.467	97.0461	95.053	119.362	98.0126	87.2804	51.4239	85.9894	63.2586	68.911	57.7624	9.16015
chr3L:26723090..26731022	40.5088	82.3404	66.7663	64.9235	48.9309	62.068	9.03948	32.9408	23.4722	37.0994	6.67153	26.7656
chr3L:26764020..26802982	51.6262	78.7125	82.3665	94.7325	70.7343	72.1055	47.1504	54.1223	38.7218	66.0295	30.8646	32.2394
chr3L:26808008..26817010	81.9936	74.3365	69.322	92.1097	71.1446	83.4937	70.1762	73.0952	52.282	76.4794	44.5146	39.8306
chr3L:26823000..26847026	57.7212	61.2684	64.8674	38.1279	41.9666	58.4531	25.0183	34.1557	25.13	62.3358	29.6292	32.8874
chr3L:26853000..26860025	68.0129	50.673	46.9956	39.4692	29.3591	36.6094	37.8892	58.8913	43.0545	31.1641	22.1517	38.054
chr3L:26875042..26882323	37.5903	36.6432	22.8232	24.1551	15.0952	27.3927	68.1454	109.623	81.4572	35.0503	65.6014	109.453
chr3L:26936122..26952524	54.0839	58.5677	33.2627	30.4328	15.6974	41.4719	128.335	183.37	133.57	77.4575	109.653	196.111
chr3L:27006381..27032943	138.409	109.53	104.449	125.588	97.9557	97.1118	102.381	161.794	118.717	76.6426	98.6834	67.217
chr3L:27066039..27081024	18.2146	25.7218	11.9853	13.8788	5.74372	18.5028	93.1266	56.4974	39.2346	15.5374	31.2096	72.2658
chr3L:27090189..27098021	50.4199	56.6215	50.8496	49.0592	47.0468	57.4357	24.545	42.9343	30.6866	69.7751	29.3413	34.4793
chr3L:27116038..27124013	56.3789	71.1027	64.6722	32.9954	25.4886	53.4204	18.1517	48.1623	35.5789	17.7081	24.9849	48.4033
chr3L:27370005..27376021	90.3937	81.8698	49.3266	46.861	42.7884	82.3992	53.7944	102.255	71.6921	75.5402	73.7996	34.2679
chr3L:27400024..27412028	51.5888	72.5391	64.8	33.8287	21.7884	55.1288	14.5618	46.3646	33.7759	12.2961	23.4682	49.3821
chr3L:27468008..27476008	80.7749	21.8211	26.8328	56.6569	45.6948	10.6612	56.178	33.9702	24.7875	19.5102	16.4551	21.384
chr3L:27492000..27500024	54.4152	71.6661	66.034	35.7458	22.663	56.8941	18.2326	49.9003	36.6058	21.1976	27.0494	57.3052
chr3L:27514003..27527012	50.2462	70.5416	68.8126	46.2741	43.7322	66.8037	34.727	44.321	31.5535	70.6225	62.8045	41.2665
chr3L:27565000..27572024	55.8653	76.0352	71.135	36.0823	22.0987	59.8341	16.1252	51.2427	37.8471	15.9502	25.3217	60.1435
chr3L:27724000..27731024	37.3363	35.6805	49.0675	32.6916	38.8853	49.6422	72.2109	50.6869	35.2784	68.6096	46.7101	31.3983
chr3L:27781000..27792009	59.5471	59.6273	49.2168	64.1582	53.6742	46.5799	30.3977	37.9365	27.1607	46.952	32.0927	10.8772
chr3L:27798054..27813025	40.691	41.1125	32.1906	62.5354	52.3811	36.2645	21.8605	26.894	19.2157	20.9113	16.8483	5.69865
chr3L:27823000..27836001	50.6133	70.8246	69.0818	46.4825	44.2784	67.0188	35.458	44.6102	31.7922	70.8758	63.4144	41.5576
chr3L:27967004..27972014	32.2153	74.9014	47.0813	26.4556	40.5311	37.1544	24.6806	45.7738	34.1727	67.6793	49.8428	56.9219
chr3L:28093201..28109025	61.7637	50.7457	53.5235	41.4342	31.0214	50.3238	27.0706	54.1636	39.6773	34.2093	25.1052	32.4528
chr3R:175071..196021	47.2445	60.3321	57.3075	31.0145	18.6603	49.5664	13.3994	41.4106	30.0923	13.2946	20.5501	35.7748
chr3R:205001..212019	67.7609	49.2392	47.4456	36.1698	28.8627	31.2518	31.9789	49.4393	36.2545	37.3672	20.8781	27.4824
chr3R:254001..259026	60.1633	82.5959	75.0481	36.7249	24.1502	62.6606	19.0103	55.9419	40.7312	16.5949	29.9166	61.4335
chr3R:305001..310020	76.5593	49.2305	61.4519	39.7277	65.0388	51.6014	28.0383	26.1917	18.905	76.7235	36.9167	25.0762
chr3R:412005..427028	54.8476	66.8809	59.6669	46.1993	39.0907	55.1781	28.6559	43.9849	32.137	41.6843	34.6587	37.9065
chr3R:452002..458026	38.4536	61.3782	42.6767	42.9608	28.6799	22.7576	77.1681	42.1612	30.1074	38.1974	18.5368	39.5831
chr3R:517034..534026	78.2171	66.0349	71.8318	54.2547	56.2414	64.3465	30.9753	38.9686	27.966	63.8794	40.3612	29.3709
chr3R:547001..553963	66.4767	50.7254	45.2268	37.6263	26.0432	30.5567	35.9485	59.0724	43.2956	34.3313	22.2096	33.4536
chr3R:615007..623026	79.9558	23.3682	28.601	55.8652	44.3401	11.1959	58.987	37.4254	27.3272	19.8064	19.4742	24.8224
chr3R:803006..812939	53.9864	35.0301	39.866	30.8845	42.8572	35.1437	46.8636	35.5238	26.2132	52.7298	77.9873	21.3489
chr3R:963002..973021	54.9642	36.2273	39.7288	32.964	45.704	36.3989	57.8271	35.2487	25.8576	55.7318	79.6717	26.0761
chr3R:989001..1005858	66.8748	44.1106	49.6271	39.3056	54.1456	43.0848	58.8098	41.0223	29.9666	66.6931	92.3381	24.3103
chr3R:1047007..1059022	77.059	73.2225	77.0154	49.218	35.7386	68.9333	24.0872	62.0866	45.9286	24.0896	36.9484	50.8115
chr3R:1086000..1093021	55.8672	78.4144	68.6834	35.83	23.1357	57.9172	18.9209	46.4451	34.6056	18.4102	28.2924	49.431
chr3R:1255023..1268015	82.2268	23.6155	26.9893	58.3986	47.0552	12.5888	49.7036	33.0803	24.0609	20.6142	18.4303	19.2314
chr3R:1400001..1420020	15.7325	74.8002	61.5588	17.2975	16.5866	57.5707	18.2078	21.4478	14.8648	19.228	13.7653	26.9934
chr3R:1457000..1463020	27.3427	37.6651	31.9069	29.3377	36.3039	38.7125	24.1825	80.2024	57.2779	26.3055	55.2372	31.1622
chr3R:1548121..1555022	79.1601	54.2489	63.7791	35.4874	65.0609	57.2723	17.4059	17.3855	12.3652	71.943	32.2892	8.99723
chr3R:1570003..1575018	60.9934	111.348	121.74	80.4455	72.107	138.126	100.602	90.0202	64.0669	94.0693	60.6146	41.6553
chr3R:1586020..1608026	62.6393	68.8068	68.5547	38.5156	44.1782	63.494	23.39	30.7039	22.4646	56.0142	34.9136	23.8287
chr3R:2141053..2156982	49.8643	49.5721	46.7272	46.1375	45.5212	50.3957	74.3092	49.5609	35.3673	61.9015	80.6995	24.6872
chr3R:2324000..2330017	69.897	52.8051	46.4136	36.418	29.2327	32.381	38.9279	60.6513	44.8039	30.6182	22.7684	37.0242
chr3R:2565006..2570018	52.7733	50.5424	51.7566	71.9635	64.4076	54.8795	50.5096	56.2717	39.8246	59.8135	38.9418	32.3578
chr3R:2823053..2832981	96.804	28.8865	31.0019	70.1326	66.1908	15.6718	55.1815	39.5978	28.9867	21.8811	18.251	23.7835
chr3R:2864000..2874895	66.5381	82.5583	74.1241	83.4384	59.5839	69.6045	51.6477	46.4333	32.8709	57.413	36.9549	33.6905
chr3R:2893010..2898015	51.0771	45.9179	38.6696	39.8664	30.1814	76.1666	19.7339	40.3581	28.5282	53.1471	14.0312	15.9273
chr3R:3040004..3047026	39.5212	56.9908	39.7446	39.2352	28.2607	21.6339	71.8459	41.1525	29.3618	34.5512	18.0365	35.6677
chr3R:3129004..3145958	42.4539	44.8995	40.2338	41.4391	38.0874	52.2033	41.6044	70.7823	50.9897	43.4635	55.5023	32.2282
chr3R:3160001..3170886	112.167	88.227	83.8003	107.499	88.6747	76.7324	49.2411	77.2629	56.6203	69.6796	56.6067	11.5755
chr3R:3379002..3396023	123.743	116.718	102.56	118.218	83.7369	173.215	67.5153	106.49	75.7199	121.631	33.6692	57.352
chr3R:3414001..3424013	84.7299	57.7646	54.3183	77.1213	68.9763	53.2165	34.8336	47.7756	34.1408	42.7094	32.7862	9.8478
chr3R:3440002..3452021	80.3223	51.4435	47.9468	72.0231	66.4297	49.0873	29.5538	40.9962	29.379	38.4707	27.7359	11.2064
chr3R:3472002..3478998	53.0275	76.9353	67.5556	34.7362	20.4551	56.0927	14.4363	47.7316	34.7237	16.041	24.5611	45.1407
chr3R:3502001..3506930	54.2425	39.6098	34.8033	65.3885	58.9567	39.5611	12.9914	56.4791	40.8073	12.4739	11.0377	16.2061
chr3R:3610062..3620019	70.9438	32.52	37.3286	71.7698	64.7297	37.7901	33.3373	50.5693	36.8555	30.357	26.242	13.9216
chr3R:3885001..3917027	110.235	103.589	86.3567	101.463	70.618	149.119	81.1347	110.968	80.1791	113.905	34.603	47.8181
chr3R:3940001..3946017	49.3437	44.7356	44.6028	72.0947	49.3613	46.7021	50.9843	53.1503	39.6872	57.4919	24.4072	18.2331
chr3R:3987001..3995024	46.2352	36.2002	40.7651	40.9126	26.2448	60.4327	36.3657	39.8693	28.0761	33.8229	14.0287	18.467
chr3R:4030003..4051002	53.4189	46.7807	55.7803	53.4938	42.6195	63.0291	44.1947	35.8924	26.0665	49.6688	22.4599	35.5636
chr3R:5622165..5629945	12.3596	17.8012	15.0796	9.73276	12.3967	36.3044	2.68099	8.42823	11.2898	84.7401	15.0671	1.58239
chr3R:6016011..6024022	29.1375	2.62219	5.7839	3.29885	4.582	5.4297	28.0467	2.5323	1.85524	0.0044388	74.7325	0.0103421
chr3R:6158559..6167026	28.664	2.61579	5.77671	3.22459	4.46554	5.56479	28.6118	2.63435	1.92927	0.00441994	74.5083	0.0108411
chr3R:6176001..6182019	33.9504	27.9904	55.4297	47.5532	64.7671	69.7118	44.0172	86.9674	62.0119	104.707	69.7528	41.8557
chr3R:6819192..6823035	356.929	396.498	683.858	367.077	450.752	453.685	81.201	115.486	208.268	193.308	328.39	76.8467
chr3R:7695002..7705022	28.4209	59.0604	64.5436	25.4547	26.689	69.3035	36.3532	37.0853	26.3181	80.8745	79.7754	63.0417
chr3R:7728058..7737465	72.8135	52.8716	28.5218	25.4964	30.7864	40.1394	64.7489	17.0334	12.454	85.5068	115.387	16.5004
chr3R:8868789..8873910	82.3901	29.7905	30.3567	66.5313	52.6821	10.4933	82.7338	34.3501	25.4125	28.2947	23.1334	28.0744
chr3R:8898001..8904024	55.1756	20.4237	32.8933	50.4323	36.3048	31.6063	40.3057	28.9178	20.8203	46.4431	68.3356	20.3109
chr3R:9304583..9311029	86.3849	111.572	106.653	57.8462	32.5719	88.9372	18.931	67.1792	49.7383	19.7915	32.5152	69.6381
chr3R:10096004..10104994	8.72865	7.95199	13.3705	14.4334	13.6363	21.0943	141.233	61.8567	44.9687	31.0657	81.7261	4.77151
chr3R:10197002..10203965	90.8299	22.8235	28.9358	63.5942	50.3991	10.2392	63.6786	37.3993	27.3885	21.5907	18.0527	24.187
chr3R:10342001..10348596	103.527	26.6849	31.6998	71.1305	56.5638	12.1181	68.5212	41.2656	30.0112	20.9559	17.4762	20.4708
chr3R:11065635..11071447	112.527	27.516	34.8946	81.1679	63.9979	12.334	74.664	42.6965	31.2221	25.367	21.3254	28.5141
chr3R:11841149..11846013	81.7211	60.9909	66.8242	91.8196	71.1886	87.3023	83.1209	62.7108	45.3384	82.6602	59.3096	22.7381
chr3R:12477001..12491022	58.9085	50.7603	60.2997	35.9987	43.8329	39.0972	48.2261	26.9312	19.22	49.9006	25.3955	51.1232
chr3R:12551309..12554869	124.234	58.7471	86.9396	111.942	330.637	169.931	12.4694	8.48335	6.21481	33.6266	20.5484	10.3969
chr3R:15103000..15110277	29.7389	42.0456	36.0498	30.7234	41.6534	42.7369	35.0787	90.523	65.6605	30.2874	72.0116	43.9819
chr3R:15413010..15421962	33.9932	45.2089	56.924	102.277	74.6826	64.7496	708.568	234.206	174.244	53.0844	59.2741	19.5869
chr3R:15601049..15609503	27.7925	38.8752	34.2969	28.1919	38.6318	40.0517	33.2467	82.8441	60.2801	28.6432	72.8785	43.3616
chr3R:15617083..15626793	21.6427	20.9826	24.2992	17.7414	28.0957	12.6286	63.0793	17.077	12.2546	45.1304	86.0793	11.738
chr3R:17509138..17516766	29.9839	42.7639	36.6438	30.9357	41.7171	42.2039	35.908	91.1446	66.2055	31.598	74.3353	46.7334
chr3R:17573060..17583797	19.3084	19.3257	22.5297	16.5148	26.1701	11.6671	55.0808	15.5846	11.2495	40.6392	78.4513	11.3106
chr3R:18034000..18040023	39.1714	62.6438	43.479	43.4971	29.5132	23.25	77.3442	41.5061	29.6587	37.7754	18.4815	38.4937
chr3R:19703653..19713994	20.0649	20.0599	23.3778	17.1414	27.1982	12.1279	55.8852	16.252	11.727	42.1569	80.8236	11.2564
chr3R:20571354..20579969	9.86912	30.7618	9.7851	43.989	16.5255	27.3834	1.76399	1.33846	3.35817	9.99176	5.59462	0.626358
chr3R:21141727..21150025	29.284	2.67489	5.79216	3.26688	4.51596	5.52106	28.0029	2.58822	1.89397	0.00428529	73.719	0.0102666
chr3R:22290167..22296611	51.7303	50.7473	50.1544	58.1367	32.3554	47.6177	125.215	28.7894	19.1882	118.076	16.2636	2.83213
chr3R:23851116..23858015	37.0339	57.7063	39.9029	39.2759	26.8869	21.0472	72.5568	39.5575	28.3826	37.4471	18.3317	35.0296
chr3R:26109000..26117560	28.9348	2.67367	5.73922	3.19195	4.43626	5.61403	28.4343	2.63104	1.92689	0.00431615	73.732	0.00995241
chr3R:26215825..26221724	115.158	31.6677	37.5201	81.1353	63.6291	13.3125	74.2905	44.8231	32.7679	25.355	21.5138	29.5837
chr3R:26556537..26564992	68.3113	89.9635	85.203	45.0795	25.3136	70.6111	15.9993	50.8064	37.8778	15.6625	29.212	43.2988
chr3R:27139510..27148028	27.4356	38.4054	34.1374	28.0653	38.4926	39.8843	32.8023	83.2878	60.7868	28.4985	72.4644	43.4308
chr3R:27342846..27351023	30.0014	2.76214	5.97609	3.35421	4.65998	5.78092	28.2293	2.68834	1.99168	0.00451828	74.799	0.0101321
chr3R:27875750..27882757	102.711	29.4222	33.6141	71.7389	55.6501	12.2882	65.6262	44.2167	32.3742	22.2864	19.0377	27.2649
chr3R:28482155..28488997	2.10417	73.4284	0.0460005	27.3483	0.0331427	0.0102289	0.827445	0.0952795	0.0247508	0.00572277	0	0
chr3R:28765000..28771988	65.998	103.092	102.718	48.8556	36.2493	89.0391	20.3016	48.3905	36.448	44.7913	43.0283	43.1898
chr3R:29213303..29222023	104.771	92.0788	102.25	208.026	177.792	105.691	130.262	171.678	110.058	41.004	71.1655	35.868
chr3R:30374517..30383023	27.5746	38.4734	33.8472	27.9064	37.9665	39.6475	32.3269	83.1007	60.6543	28.8111	72.7963	41.098
chr3R:30677118..30687874	19.3213	19.3008	22.5119	16.5166	26.2141	11.6732	54.1515	15.4841	11.1213	41.2598	77.8927	10.8167
chr3R:31996256..32005883	21.753	21.163	24.5333	17.789	28.2549	12.6908	64.5404	17.3333	12.4984	46.0854	88.2166	11.8355
chr3R:32066030..32079333	631.888	310.435	211.942	735.721	627.48	945.221	425.628	70.8273	51.1894	35.9344	342.452	56.21
chr4:137000..146016	44.8231	82.3872	52.3377	37.5426	40.7691	43.9833	33.2016	60.8909	43.7258	87.6806	50.1844	51.127
chr4:281981..289971	63.7895	28.2985	29.5871	63.5321	54.817	30.0409	35.3754	50.0944	36.1787	24.9465	22.7527	11.2974
chr4:318228..329981	60.0414	48.1526	25.6357	22.2618	27.4543	34.2971	52.9349	16.4431	11.9047	70.762	92.3139	15.5698
chr4:671186..680026	27.9559	2.57771	5.54776	3.10223	4.28065	5.38659	26.3938	3.06537	2.16439	0.0153512	70.6138	0.0211546
chr4:790007..797022	53.9403	74.871	69.8047	35.7504	42.7349	67.4776	47.8841	33.0756	23.8397	41.1968	36.123	38.4362
chr4:837173..843937	29.6581	18.7369	18.2426	20.1125	63.2504	13.6219	12.4218	6.17699	4.36913	10.2853	16.8609	11.4773
chr4:1301000..1330023	43.2182	68.7004	75.3355	84.0131	85.5191	57.0724	126.996	127.343	90.6062	105.469	206.757	100.224
chrUn_CP007073v1:1..7007	49.3975	33.677	23.9656	16.6333	25.3184	27.4476	17.9582	165.888	120.789	31.2529	36.8569	54.1779
chrUn_CP007074v1:23001..44026	69.2215	26.9992	40.0104	35.6771	30.1877	43.5696	18.3573	42.7099	31.2523	28.8079	65.7243	22.6011
chrUn_CP007074v1:63000..69766	49.8385	60.9539	63.1283	29.1851	19.7887	52.6808	16.3705	49.565	36.7608	16.7017	27.2238	52.8325
chrUn_CP007076v1:49000..54028	38.9123	79.7715	71.6737	28.8771	32.547	79.1073	15.4979	22.9359	16.3482	31.3405	11.7372	31.8881
chrUn_CP007076v1:72000..79026	63.8457	77.0361	73.3403	84.7859	65.6669	79.149	58.6984	57.0438	40.2056	71.9729	43.1367	42.8144
chrUn_CP007080v1:1..2115	156.711	251.511	252.589	241.007	214.148	238.769	753.753	197.128	140.238	597.474	479.508	43.3831
chrUn_CP007080v1:23001..28018	23.2782	23.3735	52.2212	20.3158	24.4756	35.2644	22.9298	51.0697	37.0785	36.7572	66.3555	7.74114
chrUn_CP007080v1:65000..80989	54.1613	50.138	51.5714	27.798	27.9584	42.7726	16.8598	56.1013	41.0661	30.5888	25.9577	41.4072
chrUn_CP007085v1:6003..14027	62.4797	77.1326	70.8567	79.0655	62.1798	71.6515	53.9826	51.8031	36.7024	75.9702	44.906	43.8939
chrUn_CP007085v1:38008..45120	90.7696	79.6696	86.7726	56.0018	78.1896	77.5135	34.8074	57.1914	41.5201	30.8325	35.609	18.3036
chrUn_CP007093v1:16002..24021	72.1456	90.1869	79.7888	100.146	66.3094	80.5922	50.5124	47.1027	33.3895	64.229	44.9975	23.86
chrUn_CP007094v1:4082..11022	54.7259	35.5444	36.8947	47.5943	37.0321	56.7645	50.5623	46.7254	34.2174	43.3579	33.7381	21.235
chrUn_CP007105v1:3000..9026	39.1725	62.3118	43.5294	43.1633	28.9107	23.252	78.3425	42.0178	29.9702	37.8265	18.5496	38.6591
chrUn_CP007105v1:16006..25026	51.1678	68.445	55.9573	62.2387	47.4899	45.8095	71.5055	46.6984	33.224	50.6304	30.0541	37.0804
chrUn_CP007120v1:1008..10021	45.293	41.8295	38.1998	41.8789	54.5618	52.6856	49.0918	61.053	52.7213	42.706	93.8946	64.3776
chrUn_DS483753v1:1..5026	105.793	111.944	105.356	96.0351	54.0738	89.6384	45.2826	73.2662	52.0145	56.9391	65.936	72.312
chrUn_DS483763v1:2..6546	241.172	173.427	122.827	156.681	216.384	99.2789	47.2805	88.3715	66.9595	116.864	72.5424	5.26468
chrUn_DS483770v1:35..6189	100.609	243.116	201.158	12.5598	7.44794	31.6278	14.6697	321.812	229.147	104.391	66.8847	291.423
chrUn_DS483793v1:12..5465	150.502	37.2125	13.5862	9.98639	358.91	1.87889	237.197	0.730706	0.50481	153.055	7.67237	0.929229
chrUn_DS483832v1:1..4705	47.2148	47.487	28.1357	26.3678	13.974	35.4606	150.021	240.362	177.253	44.9606	117.625	162.225
chrUn_DS483870v1:1..4231	475.181	342.187	265.232	352.715	446.995	197.379	49.4978	122.843	93.1303	205.807	115.194	6.04772
chrUn_DS483918v1:1..3819	38.0991	59.7402	34.4444	26.8896	11.6037	37.8368	171.424	114.062	77.5196	17.3442	54.9179	153.27
chrUn_DS483930v1:1..3716	221.287	2.45	15.3467	7.39296	278.844	1.15487	245.108	0.718724	0.515044	93.9271	2.62718	0.41847
chrUn_DS483970v1:3..3490	102.62	98.2137	84.7782	98.7973	64.8265	105.605	91.0723	98.3065	70.5255	91.4846	63.2097	51.4651
chrUn_DS484015v1:1..3234	444.995	284.965	207.909	336.944	419.214	164.364	49.4624	111.469	85.3098	203.156	114.182	6.18861
chrUn_DS484059v1:4..3072	103.858	20.4484	59.9792	65.7501	62.5869	80.4058	33.4978	92.9381	67.9907	72.924	109.759	38.2861
chrUn_DS484068v1:1..3013	17.4434	72.7566	44.6825	9.85004	4.32181	147.436	37.9656	15.3972	10.0559	19.4153	46.269	288.53
chrUn_DS484106v1:18..2884	37.6755	67.9277	45.7854	5.45628	2.15947	9.14785	7.8629	180.781	127.774	54.9983	110.083	248.415
chrUn_DS484122v1:3..2849	44.8106	75.7944	35.5331	133.872	47.059	83.3058	24.1961	25.0657	17.8799	16.9855	12.0657	4.71074
chrUn_DS484180v1:1..2699	48.2035	80.4481	32.7107	37.911	12.2482	49.4303	352.05	199.8	138.383	38.4566	137.434	387.24
chrUn_DS484183v1:1..2690	57.6269	59.5898	34.8966	38.5545	20.6352	46.2704	160.742	262.794	196.446	51.9666	142.262	208.413
chrUn_DS484241v1:1..2547	45.3665	14.6309	39.6984	59.0021	8.74342	57.3346	87.9734	134.178	95.5794	115.031	140.966	137.216
chrUn_DS484312v1:1..2383	67.8979	75.8348	45.6389	54.6577	31.2922	54.625	151.797	245.407	180.833	64.2994	133.426	315.127
chrUn_DS484458v1:1..2079	59.2396	59.8991	34.9208	28.9642	15.1849	42.0054	161.877	277.271	207.653	41.7703	130.94	205.374
chrUn_DS484499v1:12..1987	40.3718	39.2363	23.6845	22.17	11.3682	32.1386	170.762	224.371	165.28	38.8374	103.014	185.001
chrUn_DS484567v1:1..1900	67.3382	56.7746	34.808	36.2639	20.6994	53.6051	203.704	317.673	241.311	46.4912	158.576	215.184
chrUn_DS484689v1:1..1651	19.7436	91.3238	58.5563	13.3211	5.73576	205.438	40.0774	15.7477	10.1828	17.5263	54.4274	322.979
chrUn_DS484748v1:1..1540	57.1359	52.5371	30.1976	24.7581	13.6291	42.8589	184.128	428.278	322.286	44.2152	148.389	105.944
chrUn_DS484751v1:3..1533	53.7216	105.538	37.3878	39.8069	10.3159	41.156	303.701	190.976	132.809	39.631	105.26	285.379
chrUn_DS484754v1:1..1453	37.6761	43.0752	34.1941	22.4911	19.2451	30.9308	136.936	50.9933	36.7532	302.087	75.6485	13.4506
chrUn_DS484852v1:1..1383	362.691	362.167	533.706	242.652	394.934	453.08	159.8	240.22	438.946	201.574	751.951	243.593
chrUn_DS484887v1:10..1362	94.5935	182.164	111.615	259.191	89.3356	174.09	27.3284	27.4438	19.8748	47.6601	15.059	1.60777
chrUn_DS485280v1:30..1158	158.524	186.106	155.789	161.35	300.358	221.431	56.1434	87.5266	82.46	69.1275	291.092	439.923
chrUn_DS485426v1:9..1145	468.632	291.307	204.884	381.323	459.761	142.768	54.9998	109.066	81.8354	225.668	141.972	6.15949
chrUn_DS485792v1:6..1039	341.895	272.421	420.728	185.801	468.734	450.891	66.7363	181.828	450.972	87.8163	409.49	192.89
chrUn_DS485820v1:5..1045	227.585	359.534	279.441	245.004	349.347	386.913	60.3997	226.391	262.701	250.698	1023.61	86.978
chrX:3034..16009	23.4208	44.8092	59.0067	85.1693	55.0476	114.911	87.5485	81.7169	58.0868	100.536	126.916	95.8377
chrX:47017..134025	30.4753	46.7678	49.7804	52.3032	24.12	108.997	82.4973	131.822	93.886	79.1382	101.424	115.026
chrX:296001..304014	28.6218	41.2709	34.553	28.9739	39.4074	40.1308	34.5512	89.5983	65.2427	30.4644	71.0402	42.3579
chrX:550297..558981	26.2825	36.7051	31.5398	26.4616	36.4207	36.7689	33.1301	80.4068	58.3888	27.8157	73.7278	41.8448
chrX:811127..818926	80.1848	18.4521	24.0544	57.6161	46.2125	8.57314	42.927	29.7613	21.8545	17.0425	15.7124	19.8226
chrX:1032015..1041013	25.6691	36.1686	31.101	26.1374	35.6801	36.0292	31.7564	79.9741	58.2902	27.6222	65.3676	40.2852
chrX:1628025..1635441	100.539	4.49022	44.6902	52.4214	46.109	71.9272	11.8591	54.4793	39.25	23.6378	170.753	25.2303
chrX:1931000..1937022	37.8387	59.554	41.8902	41.577	28.2793	21.7281	75.1961	41.0412	29.3599	36.6492	18.4977	37.5222
chrX:1954941..1963539	77.7308	57.7843	31.6166	28.1512	34.126	44.5166	73.7923	18.6377	13.608	92.8391	127.749	19.513
chrX:2308839..2317022	29.9646	2.74863	5.91075	3.30891	4.58326	5.7031	28.7529	2.62335	1.9235	0.00451497	74.9556	0.0101247
chrX:3180002..3186024	40.4691	62.7866	43.6016	43.4405	29.2429	23.1113	77.0665	41.4129	29.5765	37.919	19.0916	37.9918
chrX:3383153..3390368	13.179	35.5637	13.6146	7.90456	7.75278	10.2661	21.1862	44.6749	32.7426	48.2698	30.3656	66.0052
chrX:3987001..3995088	28.2901	40.3761	34.1016	28.5928	38.9058	39.4517	33.1953	85.6706	62.1299	29.6179	75.7013	45.4751
chrX:4156012..4164929	78.7534	22.7761	26.6651	54.8095	43.2488	9.70824	50.5181	34.2379	25.0347	17.3144	14.9287	21.062
chrX:4364013..4369972	2.68921	4.58049	12.6692	3.18738	2.38504	17.8759	5.20019	3.29554	1.80926	6.373	80.5867	7.23363
chrX:4829001..4836382	62.0463	96.9331	95.4591	44.9258	34.0758	84.9515	17.6249	46.0514	34.5968	43.0566	40.1209	47.7973
chrX:5096333..5103838	32.5533	82.6629	90.1137	29.4294	32.0494	96.8268	29.4486	39.3027	27.937	84.5932	96.1024	64.89
chrX:6445353..6451067	113.896	27.1934	34.3013	83.0201	65.1368	12.1471	85.5994	44.2172	32.3495	27.2132	22.5883	28.9251
chrX:6527232..6536019	155.581	170.923	127.118	7.14397	37.9471	169.801	7.42653	5.56466	4.74593	23.1025	9.96743	1.55448
chrX:6562035..6571026	27.182	2.67232	5.60542	3.16161	4.24721	5.02039	26.9195	2.41382	1.76699	0.354457	68.169	0.19564
chrX:7021197..7032833	45.2844	33.1025	22.434	16.6259	23.6315	26.134	16.5179	139.405	101.747	26.7237	33.0529	51.1394
chrX:8292784..8296775	9.99229	329.403	262.876	53.3648	13.6938	252.962	18.5589	7.46024	5.7258	133.952	19.136	10.0867
chrX:9087010..9095988	34.8429	46.3956	59.2856	103.275	75.35	65.4886	714.515	239.547	177.351	53.674	59.631	21.9099
chrX:9798573..9805582	113.532	29.6752	34.0368	85.9726	82.343	12.5555	65.4007	44.6824	32.7002	22.2698	18.9857	28.1809
chrX:10094282..10102026	82.1071	20.4784	26.3904	58.0704	47.1697	9.64684	64.5733	33.8539	24.7326	20.0868	17.262	22.5848
chrX:10138201..10145710	30.0862	43.8878	37.5918	30.6413	41.85	43.602	35.7557	92.5615	67.2112	31.8916	76.4529	42.3678
chrX:10523092..10532025	79.3029	22.944	26.76	55.3901	43.3723	9.78924	56.1047	34.1176	24.9518	17.7082	14.811	20.8745
chrX:11192432..11203952	140.818	25.5536	71.8345	58.9139	73.8885	102.903	10.6774	180.114	132.429	12.3586	15.1391	99.7038
chrX:11312119..11320666	63.1209	46.7141	27.1031	23.5142	26.4197	37.854	57.7503	16.6699	12.1615	79.6377	100.351	15.7687
chrX:11633054..11641992	80.007	23.6309	27.1555	55.7468	43.5948	9.88219	51.2188	36.3314	26.5908	17.4646	14.9359	22.29
chrX:14157647..14163257	132.536	28.8698	34.9349	104.362	100.201	12.5298	78.495	44.5473	32.5496	26.6896	22.2794	30.9386
chrX:14552000..14558023	38.2166	60.9562	42.1408	42.4709	28.436	22.7213	78.1433	42.2321	30.1205	35.6491	18.329	36.4255
chrX:15503021..15514001	156.485	167.193	187.747	221.573	115.646	120.603	177.922	219.129	165.822	111.341	1624.19	34.4788
chrX:17114002..17119022	28.7168	2.69635	5.95466	3.23462	4.79055	5.81736	25.8931	2.71844	1.98454	0.00132094	76.5487	0.00652679
chrX:17195016..17200022	22.3639	22.5063	49.9662	19.187	23.4205	33.4243	23.0236	45.2102	32.2929	36.3142	68.3277	6.7997
chrX:18754385..18758006	100.399	39.3672	39.7314	85.3162	69.2823	13.9862	109.704	46.141	33.8504	38.8031	29.015	38.1852
chrX:19136113..19143708	28.2079	39.4024	33.6793	27.7271	38.533	38.772	34.2991	83.993	60.965	28.1106	74.3082	44.9194
chrX:19798000..19805526	71.8901	95.8874	91.4249	49.1075	28.0568	76.9887	17.6661	55.4111	40.7884	17.8027	32.4111	54.7185
chrX:20033360..20036942	102.644	41.9741	41.1076	82.254	69.2534	14.3498	114.302	45.8956	34.1804	39.6508	31.76	39.6122
chrX:21518011..21560087	357.912	199.316	234.153	172.831	112.975	144.464	386.571	247.509	188.008	256.239	244.446	176.019
chrX:21630016..21690027	115.65	110.93	122.35	89.8828	105.346	139.52	106.967	163.421	118.101	173.543	201.394	82.4
chrX:21702000..21849022	70.2884	55.2764	64.4441	48.7764	58.3649	74.8494	69.2719	102.815	74.8392	92.5617	102.98	60.8829
chrX:21866001..21894024	31.948	57.318	60.8369	51.6606	66.0832	76.4242	59.0461	71.1733	51.419	85.1469	87.3053	57.1954
chrX:21914000..22048023	43.3639	61.4941	48.7077	45.8594	48.7653	54.8031	48.513	44.2372	31.8694	55.6675	55.3297	41.3213
chrX:22055006..22142023	61.1645	74.352	61.811	52.9731	51.5179	66.1175	52.8731	49.2661	35.4031	54.2742	53.9835	60.1337
chrX:22249000..22263024	52.1324	40.8827	62.1784	43.9147	65.5045	53.0667	68.0495	37.8707	27.2118	101.767	48.581	73.2435
chrX:22270003..22282923	158.729	152.516	177.259	159.964	150.868	164.242	144.352	111.172	80.3243	133.235	96.5775	284.097
chrX:22314924..22317796	120.396	110.996	134.716	166.387	146.437	145.761	101.447	77.1985	55.2357	92.9521	65.0307	173.066
chrX:22350000..22406025	91.5192	96.3448	112.063	105.577	101.471	105.631	101.242	78.4835	55.7389	125.67	88.0526	98.4895
chrX:22619358..22626757	89.1754	22.5857	27.6667	62.4431	49.072	9.90232	67.5504	36.2943	26.5304	21.3374	18.0014	23.5628
chrX:22682000..22688985	31.6147	26.0291	50.4123	43.6411	57.9001	62.888	41.8755	81.8254	58.4924	96.3713	66.4784	41.058
chrX:22985002..22991016	48.3275	51.7276	59.4799	62.1513	66.145	40.8067	31.5191	16.914	12.4654	33.1154	16.4236	20.8502
chrX:23320000..23336019	80.7478	110.279	86.112	82.4463	72.3912	92.6262	72.7786	87.1431	60.7006	102.099	73.1769	44.8307
chrX:23376000..23384022	78.9994	84.2851	55.7708	69.9257	62.2302	50.5584	39.0444	55.5646	40.0088	63.1839	44.2277	14.6469
chrX:23469000..23500015	61.1321	76.8743	75.8565	75.9675	72.7281	76.8768	38.779	59.3385	48.5071	51.8902	100.995	48.8746
chrX_CP007103v1_random:24005..30022	47.6386	76.0308	74.8722	66.2315	52.0846	70.9785	48.9262	42.7648	30.0255	53.2935	49.3923	52.1194
chrX_CP007104v1_random:23224..27406	79.3155	142.563	87.6278	65.2713	55.0483	85.562	63.8975	84.9447	58.7947	91.5345	79.4249	31.1861
chrX_DS483648v1_random:9001..13933	47.0217	66.0032	87.4777	84.0098	142.051	99.5991	30.959	96.9287	86.7334	66.4901	127.036	45.8009
chrX_DS483655v1_random:9183..13549	155.963	158.607	214.886	165.378	153.072	151.602	200.509	112.267	79.6689	273.303	159.128	291.843
chrX_DS483685v1_random:2..2775	112.641	179.282	127.549	118.405	116.838	136.308	104.193	91.7459	72.6958	78.1255	146.6	184.877
chrX_DS483803v1_random:4..5231	53.7973	27.4741	57.6361	65.1939	72.896	51.7366	70.6182	42.209	30.9928	41.4499	41.4599	112.998
chrX_DS483818v1_random:2..4919	50.1773	12.272	38.7494	53.1242	59.3607	36.3629	90.1023	40.6693	30.0687	38.892	55.3289	202.713
chrX_DS483928v1_random:1..3729	60.4746	68.2151	60.3002	52.792	48.6731	60.9583	37.2455	49.0796	34.1475	98.9819	67.0255	21.3064
chrX_DS483955v1_random:12..3553	65.8286	29.9591	50.5667	44.2965	49.5603	39.3255	78.2643	35.2142	26.1711	48.9826	47.3208	173.936
chrX_DS483971v1_random:1..3475	97.5969	113.613	186.469	203.448	164.809	229.599	53.0821	59.9627	42.1526	105.591	85.4814	33.995
chrX_DS484057v1_random:3..3074	110.249	131.137	118.359	120.471	139.573	140.149	60.3633	77.5589	59.2266	106.318	187.144	202.197
chrX_DS484075v1_random:2..2998	226.937	228.462	260.234	237.962	215.383	268.912	204.56	139.588	102.43	188.341	124.405	491.719
chrX_DS484132v1_random:1..2829	29.0378	7.66996	23.901	31.7133	33.7671	21.5761	65.6481	33.5252	24.7303	22.5156	40.4736	106.183
chrX_DS484185v1_random:1..2686	78.7005	144.122	154.458	103.96	112.177	123.521	99.4104	47.2439	34.2808	149.195	115.911	57.0795
chrX_DS484216v1_random:2..2602	67.0397	47.7208	81.0774	62.4456	80.1784	60.4858	130.139	58.5113	42.0548	88.8626	71.0907	159.265
chrX_DS484519v1_random:17..1963	402.595	591.413	673.494	639.81	869.719	863.05	180.398	524.322	491.605	288.954	1667.53	336.063
chrX_DS484556v1_random:3..1916	51.6432	12.5454	39.9898	54.9793	61.9039	38.5853	100.073	42.7808	32.4777	36.5683	64.5231	235.553
chrX_DS484615v1_random:2..1797	42.334	28.6924	44.4107	33.7908	37.0893	34.7136	69.2779	31.4095	22.695	28.4749	39.579	174.551
chrX_DS484697v1_random:1..1637	45.9638	11.8208	36.2027	53.403	59.7733	35.7296	82.7294	31.7341	23.5409	32.9231	49.8286	214.018
chrX_DS484974v1_random:1..1304	293.447	313.811	320.518	193.862	175.421	241.576	202.687	93.468	72.32	161.629	106.165	565.869
chrX_DS484990v1_random:1..1300	242.633	354.147	230.402	238.234	260.838	259.436	183.791	130.382	90.6339	166.419	140.303	593.646
chrX_DS484997v1_random:10..1293	111.208	127.411	246.57	337.355	228.704	330.773	48.1633	58.135	41.134	66.7564	82.7813	29.5509
chrX_DS485111v1_random:1..1237	382.156	377.912	579.099	207.438	431.956	447.458	168.826	315.143	571.561	206.681	639.955	306.142
chrX_DS485592v1_random:1..1102	200.355	174.45	196.312	178.686	217.459	163.816	197.47	186.499	133.119	152.921	160.218	303.655
chrX_DS485647v1_random:1..1086	245.571	198.224	272.89	209.154	278.693	185.936	270.075	258.45	187.512	163.211	206.436	461.357
chrX_DS485672v1_random:9..1078	231.577	424.41	306.757	255.105	289.002	320.021	226.571	276.597	247.747	154.282	576.158	464.976
chrX_TAS:1..9024	1363.17	669.564	485.244	903.071	913.992	1660.84	157.997	31.0476	22.3567	46.7438	168.796	27.2011
chrY:131147..137253	70.1349	49.8556	22.98	18.1178	25.8531	28.1406	55.8987	16.4056	11.9945	70.7927	107.115	13.4919
chrY:404021..421023	54.6245	70.4026	65.4894	38.7391	22.8466	58.2307	12.5628	38.1279	28.046	13.768	20.5443	40.5922
chrY:670041..677884	32.816	25.7069	46.1088	41.3709	45.8849	44.689	51.4619	26.3081	18.3229	34.5425	33.055	35.3603
chrY:727005..737803	32.5858	29.6945	36.0239	30.4137	42.9587	30.9632	56.7306	27.4434	19.739	46.0663	82.3809	18.1134
chrY:748001..754025	39.0315	62.1706	43.3892	43.4504	29.4693	23.2011	75.6974	41.6729	29.8385	38.4323	18.4333	37.7759
chrY:784003..790913	37.4777	57.4897	40.0423	40.3064	27.5394	21.3152	72.7047	40.2383	28.9936	37.2744	17.6326	38.8454
chrY:1091004..1099024	45.576	40.1224	59.4082	61.4971	57.6754	60.6524	57.1449	35.7841	25.3076	66.6622	36.9169	32.4585
chrY:1281015..1287932	65.7139	61.8145	56.7435	68.328	48.5035	70.7778	61.1536	57.6267	40.9723	59.3514	41.6431	26.5621
chrY:1460028..1473004	61.2897	85.1349	79.0537	101.336	66.1283	88.3757	39.6367	32.6255	23.3764	49.6617	20.719	4.91295
chrY:1695000..1701956	50.5595	71.0903	61.5497	34.81	22.9098	55.3785	15.4727	48.5976	35.4998	17.7719	23.6524	50.5909
chrY:1718000..1726987	56.2513	76.2445	69.8771	63.0905	56.9618	77.6728	38.6347	44.3877	31.6888	57.476	25.8492	25.2394
chrY:1732048..1737858	27.0296	23.2155	22.7213	55.4834	44.7129	28.8129	14.2593	15.362	11.3386	17.1384	11.9424	7.63982
chrY:1868031..1881006	61.3014	85.1323	79.0746	101.315	66.142	88.4273	39.7215	32.7478	23.4592	49.7182	20.868	5.13379
chrY:2116001..2122991	55.0477	29.6464	54.3	60.5086	52.8285	60.6567	57.2465	37.2994	26.0493	60.3329	73.9617	39.3595
chrY:2211000..2218020	56.8711	75.9663	69.4006	39.3976	26.1206	57.4505	16.0449	45.7788	33.6816	15.5526	26.6917	47.8761
chrY:2268000..2273027	72.0825	52.9636	84.7877	27.5976	22.7198	23.3574	33.3108	38.4447	27.8991	10.4916	12.9601	20.7927
chrY:2322000..2329026	56.1864	76.5995	70.0912	38.5364	25.4283	57.9967	14.7701	45.9066	33.8134	14.9851	25.9134	47.7973
chrY:2707067..2712025	62.8996	73.1325	67.2547	76.2733	56.8631	58.6768	63.8717	54.8613	38.3574	66.0806	40.5322	49.9305
chrY:2728000..2735024	67.1959	102.003	104.233	84.6004	72.46	117.619	81.7291	74.2141	52.6102	78.1678	52.6741	37.5658
chrY:2978000..2984026	39.2202	62.3554	43.5603	43.1743	28.9166	23.259	78.3236	42.0444	29.9968	37.816	18.5585	38.6708
chrY:3155001..3161022	39.6657	62.8971	43.9536	43.9469	29.486	23.2428	77.06	41.1975	29.4838	38.3125	18.9485	39.3332
chrY:3168946..3174026	83.1114	61.4495	56.6962	47.4948	30.7588	38.4619	46.3364	82.2486	60.1069	48.6297	26.2113	42.1491
chrY:3279002..3285902	55.3799	68.0534	58.2731	38.6234	21.8565	50.4558	18.9277	34.9928	25.8033	18.7278	23.7175	29.2603
chrY:3437001..3446024	24.9182	34.6186	30.1637	25.6974	34.6399	35.6771	30.3256	79.0878	57.5149	26.4823	61.2471	37.7704
chrY:3502006..3509004	32.1652	12.6987	24.223	28.4987	18.4299	28.0773	22.1837	24.0978	17.0973	35.2583	59.0642	17.4627
chrY_CP007107v1_random:20001..24677	60.6035	79.9948	71.0143	87.1101	70.3042	80.4993	65.9204	67.3076	47.6698	69.9876	38.9946	25.2225
chrY_CP007110v1_random:14018..23008	57.8307	38.986	41.8574	59.8431	40.9623	42.8816	29.361	42.5568	31.3817	35.3527	24.1597	6.62386
chrY_CP007111v1_random:1..33026	87.9285	357.294	43.8539	45.6927	255.322	2.07043	86.5446	2.12191	1.58451	60.9064	22.7781	1.3723
chrY_CP007114v1_random:18001..30013	50.5171	39.6031	53.4066	46.0294	38.2548	53.7236	88.9107	34.4948	24.4731	81.8807	50.094	34.3969
