# Supplementary material for: Rapid evolution of piRNA-mediated silencing of an invading transposable element was driven by abundant de novo mutations
Source: HighWire-hosted journal article supplement (doi:10.1101/gr.251546.119), 2020-04-01
Supplement: Supplemental_Table_S4.xlsx [file Supplemental_Table_S4.xlsx]

## Sheet: Sheet1
Table S4. Comparion between TEMP using uniquely aligned reads and our mehod using high-quality alignments. P-element breakpoints are in dm3 coordinate. TEMP: insertions only found by TEMP (Zhauang et al. 2014); MAPQ20: insertions only found by our method; Both: insertions found by TEMP and our method; 53 DGRP genomes were compared. At least 6 read pairs were required to call a P-element insertion…
ID	breakpoints	category
DGRP38	chr2L:8535193	Both
DGRP38	chr2R:5440976	Both
DGRP38	chr2R:10601145	Both
DGRP38	chr2R:17385138	Both
DGRP38	chr3L:4755638	Both
DGRP38	chr3L:7765291	Both
DGRP38	chr3L:13220872	Both
DGRP38	chr3L:16799748	Both
DGRP38	chr3L:19892782	Both
DGRP38	chrX:71465	Both
DGRP38	chrX:3226830	Both
DGRP38	chrX:8785870	Both
DGRP38	chrX:8785870	Both
DGRP38	chrX:11608834	Both
DGRP38	chrX:17912965	Both
DGRP38	chrX:19192813	Both
DGRP38	chr2L:22134305	MAPQ20
DGRP38	chr3L:128538	MAPQ20
DGRP38	chr3R:14742868	MAPQ20
DGRP38	chr3R:20875704	MAPQ20
DGRP38	chr3R:27634521	MAPQ20
DGRP38	chrX:8788277	MAPQ20
DGRP38	chrX:8964211	MAPQ20
DGRP38	chrX:10651732	MAPQ20
DGRP38	chrX:14594812	MAPQ20
DGRP40	chr2L:8162435	Both
DGRP40	chr2L:10469555	Both
DGRP40	chr2L:14490582	Both
DGRP40	chr2R:2644874	Both
DGRP40	chr2R:2927674	Both
DGRP40	chr2R:8847724	Both
DGRP40	chr2R:13299189	Both
DGRP40	chr3L:1884950	Both
DGRP40	chr3L:13986605	Both
DGRP40	chr3L:16884263	Both
DGRP40	chr3R:9135192	Both
DGRP40	chr3R:11117380	Both
DGRP40	chr3R:14224953	Both
DGRP40	chrX:7089129	Both
DGRP40	chrX:9029070	Both
DGRP40	chrX:12621667	Both
DGRP40	chrX:18820198	Both
DGRP40	chr2L:3632190	MAPQ20
DGRP40	chr2L:21582370	MAPQ20
DGRP40	chr3L:20434930	MAPQ20
DGRP40	chr3RHet:2336808	MAPQ20
DGRP40	chrX:4830530	MAPQ20
DGRP40	chrX:4942172	MAPQ20
DGRP40	chrX:7785967	MAPQ20
DGRP42	chr2L:5943962	Both
DGRP42	chr2L:6071093	Both
DGRP42	chr2L:7437425	Both
DGRP42	chr2L:9437481	Both
DGRP42	chr2L:15552708	Both
DGRP42	chr3L:9377099	Both
DGRP42	chr3L:11077735	Both
DGRP42	chr3L:22401490	Both
DGRP42	chr3R:1480536	Both
DGRP42	chr3R:13875208	Both
DGRP42	chr3R:20019626	Both
DGRP42	chrX:6495780	Both
DGRP42	chrX:6762345	Both
DGRP42	chrX:9058815	Both
DGRP42	chr3L:11002050	MAPQ20
DGRP42	chr3L:21373315	MAPQ20
DGRP42	chr3R:773761	MAPQ20
DGRP42	chr3R:5377500	MAPQ20
DGRP42	chr3R:8293697	MAPQ20
DGRP42	chr3R:11234115	MAPQ20
DGRP42	chr3R:12076524	MAPQ20
DGRP42	chr3R:15715901	MAPQ20
DGRP42	chrX:8468498	MAPQ20
DGRP75	chr2L:3018390	Both
DGRP75	chr2L:13717359	Both
DGRP75	chr2L:16325973	Both
DGRP75	chr2R:5300973	Both
DGRP75	chr2R:7599693	Both
DGRP75	chr2R:9852180	Both
DGRP75	chr2R:15344551	Both
DGRP75	chr3L:140537	Both
DGRP75	chr3L:13443357	Both
DGRP75	chr3L:18833637	Both
DGRP75	chr3L:19907126	Both
DGRP75	chr3L:21027640	Both
DGRP75	chr3R:3579441	Both
DGRP75	chr3R:14411359	Both
DGRP75	chr3R:21463556	Both
DGRP75	chr3R:22937912	Both
DGRP75	chr3R:22962317	Both
DGRP75	chr3R:23731698	Both
DGRP75	chrX:5649638	Both
DGRP75	chrX:6233096	Both
DGRP75	chrX:19781025	Both
DGRP75	chrX:20122396	Both
DGRP75	chr2L:7993161	MAPQ20
DGRP75	chr2L:10856624	MAPQ20
DGRP75	chr2R:7184930	MAPQ20
DGRP75	chr3R:773682	MAPQ20
DGRP75	chr3R:10103684	MAPQ20
DGRP75	chrX:16589223	MAPQ20
DGRP75	chrX:19216728	MAPQ20
DGRP75	chrX:19392100	MAPQ20
DGRP83	chr2L:249365	Both
DGRP83	chr2L:2808085..2808097	TEMP
DGRP83	chr2L:3619245	Both
DGRP83	chr2L:6071093	Both
DGRP83	chr2L:14352141	Both
DGRP83	chr2L:15333605	Both
DGRP83	chr2R:6429232	Both
DGRP83	chr2R:8050597	Both
DGRP83	chr3L:16016387	Both
DGRP83	chr3L:18634475	Both
DGRP83	chr3L:21233303	Both
DGRP83	chr3R:10456076	Both
DGRP83	chr3R:17459406	Both
DGRP83	chrX:4824210	Both
DGRP83	chrX:14216175	Both
DGRP83	chrX:18428614	Both
DGRP83	chrX:19192704	Both
DGRP83	chr2L:2808033	MAPQ20
DGRP83	chr2L:5944688	MAPQ20
DGRP83	chr2L:8699433	MAPQ20
DGRP83	chrX:4830195	MAPQ20
DGRP83	chrX:15980062	MAPQ20
DGRP83	chrX:16165007	MAPQ20
DGRP109	chr2R:17062824	Both
DGRP109	chr3L:544190	Both
DGRP109	chr3L:10653998	Both
DGRP109	chr3R:2504340	Both
DGRP109	chr3R:3315896	Both
DGRP109	chr3R:3856291	Both
DGRP109	chr3R:4485350	Both
DGRP109	chr3R:4873251	Both
DGRP109	chr3R:8268856	Both
DGRP109	chr3R:16275480	Both
DGRP109	chr3R:20480917	Both
DGRP109	chr3R:23731680	Both
DGRP109	chrX:72304	Both
DGRP109	chrX:72304	Both
DGRP109	chrX:1103905	Both
DGRP109	chrX:10440954	Both
DGRP109	chrX:12557449	Both
DGRP109	chrX:13171309	Both
DGRP109	chrX:13563715	Both
DGRP109	chrX:21845575	Both
DGRP109	chr2L:5800196	MAPQ20
DGRP109	chr2L:6479459	MAPQ20
DGRP109	chr2L:8205166	MAPQ20
DGRP109	chr2L:20716158	MAPQ20
DGRP109	chr2R:2603424	MAPQ20
DGRP109	chr2R:5579556	MAPQ20
DGRP109	chr2R:8557745	MAPQ20
DGRP109	chr2R:8884768	MAPQ20
DGRP109	chr3R:7783323	MAPQ20
DGRP109	chr3R:24889055	MAPQ20
DGRP109	chrX:821674	MAPQ20
DGRP142	chr2L:20797707	Both
DGRP142	chr3L:131793	Both
DGRP142	chr3L:13221625	Both
DGRP142	chr3L:14267410	Both
DGRP142	chr3L:15961327	Both
DGRP142	chr3L:16040014	Both
DGRP142	chr3L:16489344	Both
DGRP142	chr3L:19056587	Both
DGRP142	chr3R:19768956	Both
DGRP142	chr3R:20639716	Both
DGRP142	chrX:14746917..14747417	TEMP
DGRP142	chrX:17903575	Both
DGRP142	chr3L:14748153	MAPQ20
DGRP142	chrX:14747462	MAPQ20
DGRP142	chrX:20201608	MAPQ20
DGRP177	chr2L:3354866	Both
DGRP177	chr2L:15332836	Both
DGRP177	chr2L:15333756..15333768	TEMP
DGRP177	chr2L:21677923	Both
DGRP177	chr2R:2389393	Both
DGRP177	chr2R:5965844	Both
DGRP177	chr2R:7817911	Both
DGRP177	chr2R:12716231	Both
DGRP177	chr3L:1848518	Both
DGRP177	chr3R:4672368	Both
DGRP177	chr3R:7808471	Both
DGRP177	chr3R:7808471	Both
DGRP177	chr3R:14749762	Both
DGRP177	chrX:10441740	Both
DGRP177	chrX:13649560	Both
DGRP177	chrX:17805480	Both
DGRP177	chr2L:5108498	MAPQ20
DGRP177	chr2L:10335038	MAPQ20
DGRP177	chr2L:15333601	MAPQ20
DGRP177	chr2L:21656349	MAPQ20
DGRP177	chr2R:5297145	MAPQ20
DGRP177	chr2R:11370352	MAPQ20
DGRP177	chr3L:1688731	MAPQ20
DGRP177	chr3L:14267293	MAPQ20
DGRP177	chr3L:19461193	MAPQ20
DGRP177	chrX:13685108	MAPQ20
DGRP229	chr2L:12483067	Both
DGRP229	chr2R:432213	Both
DGRP229	chr2R:4747864	Both
DGRP229	chr3L:1196328	Both
DGRP229	chr3L:1586460..1586555	TEMP
DGRP229	chr3L:9455683	Both
DGRP229	chr3L:10356973	Both
DGRP229	chr3L:11813065	Both
DGRP229	chr3L:18833611	Both
DGRP229	chr3R:1833379	Both
DGRP229	chr3R:4076193	Both
DGRP229	chr3R:4496712	Both
DGRP229	chr3R:14749562	Both
DGRP229	chr3R:22977367	Both
DGRP229	chrX:15705783	Both
DGRP229	chrX:18669161	Both
DGRP229	chrX:19781018..19781048	TEMP
DGRP229	chrX:19781160	Both
DGRP229	chrX:21048136	Both
DGRP229	chr2L:129509	MAPQ20
DGRP229	chr2L:13244696	MAPQ20
DGRP229	chr2L:21656349	MAPQ20
DGRP229	chr3L:1586667	MAPQ20
DGRP229	chr3RHet:791681	MAPQ20
DGRP229	chr3R:11798976	MAPQ20
DGRP235	chr3L:3198992	Both
DGRP235	chr3L:6962821	Both
DGRP235	chr3L:16799748	Both
DGRP235	chr3L:20617580	Both
DGRP235	chr3R:8545680	Both
DGRP235	chr3R:17122206	Both
DGRP235	chr3R:19074862	Both
DGRP235	chrX:2200111	Both
DGRP235	chrX:19781300	Both
DGRP235	chr2L:15333805	MAPQ20
DGRP235	chr2L:19575075	MAPQ20
DGRP235	chr3L:13987350	MAPQ20
DGRP235	chr3R:1833178	MAPQ20
DGRP235	chr3R:18492358	MAPQ20
DGRP235	chrX:650989	MAPQ20
DGRP235	chrX:8317013	MAPQ20
DGRP235	chrX:13536100	MAPQ20
DGRP320	chr2L:2242271	Both
DGRP320	chr2L:2808167	Both
DGRP320	chr2R:7258642	Both
DGRP320	chr2R:17384984	Both
DGRP320	chr2R:17927135	Both
DGRP320	chr3L:12907157	Both
DGRP320	chr3R:10109728	Both
DGRP320	chr3R:19171380	Both
DGRP320	chrX:72315	Both
DGRP320	chrX:2579595	Both
DGRP320	chrX:8787961	Both
DGRP320	chrX:13290857	Both
DGRP320	chrX:14726683	Both
DGRP320	chrX:16207644	Both
DGRP320	chrX:17592865	Both
DGRP320	chr2L:9699749	MAPQ20
DGRP320	chr2R:3693848	MAPQ20
DGRP320	chr3L:22721135	MAPQ20
DGRP320	chr3L:22721206	MAPQ20
DGRP320	chr3R:21862656	MAPQ20
DGRP320	chrX:8087043	MAPQ20
DGRP320	chrX:11516925	MAPQ20
DGRP320	chrX:21502884	MAPQ20
DGRP321	chr2L:479843	Both
DGRP321	chr2L:8464081	Both
DGRP321	chr2L:10335281	Both
DGRP321	chr2L:16326045	Both
DGRP321	chr2L:16326045	Both
DGRP321	chr2L:18845153	Both
DGRP321	chr2L:20429002	Both
DGRP321	chr2R:4033439	Both
DGRP321	chr2R:6429214	Both
DGRP321	chr2R:8868402	Both
DGRP321	chr2R:10044986	Both
DGRP321	chr2R:17759480	Both
DGRP321	chr2RHet:351785	Both
DGRP321	chr3L:13986651	Both
DGRP321	chr3L:19900320	Both
DGRP321	chr3R:4076143	Both
DGRP321	chr3R:19877375	Both
DGRP321	chr3R:20967911	Both
DGRP321	chrX:3571677	Both
DGRP321	chrX:5574020	Both
DGRP321	chrX:10521605	Both
DGRP321	chrX:13116207	Both
DGRP321	chrX:13290857	Both
DGRP321	chrX:19781160	Both
DGRP321	chr2L:7437451	MAPQ20
DGRP321	chr2L:20311069	MAPQ20
DGRP321	chr2R:8749994	MAPQ20
DGRP321	chr2R:17266971	MAPQ20
DGRP321	chr3R:4983711	MAPQ20
DGRP321	chr3R:4983959	MAPQ20
DGRP321	chr3R:8453788	MAPQ20
DGRP321	chr3R:9510153	MAPQ20
DGRP321	chr3R:18967682	MAPQ20
DGRP321	chrX:7018933	MAPQ20
DGRP321	chrX:8964211	MAPQ20
DGRP362	chr2L:4852843	MAPQ20
DGRP362	chr2L:6455217	MAPQ20
DGRP362	chr2L:8159818	MAPQ20
DGRP362	chr2L:12026470	MAPQ20
DGRP362	chr2R:584195	MAPQ20
DGRP362	chr2R:2644874	MAPQ20
DGRP362	chr2R:2927674	MAPQ20
DGRP362	chr2R:7502593	MAPQ20
DGRP362	chr2R:8416537	MAPQ20
DGRP362	chr2R:8749994	MAPQ20
DGRP362	chr2R:14577323	MAPQ20
DGRP362	chr2R:15162801	MAPQ20
DGRP362	chr3L:4976311	MAPQ20
DGRP362	chr3L:4976467	MAPQ20
DGRP362	chr3L:9376742	MAPQ20
DGRP362	chr3L:13220879	MAPQ20
DGRP362	chr3L:13221625	MAPQ20
DGRP362	chr3R:3317371	MAPQ20
DGRP362	chr3R:3853473	MAPQ20
DGRP362	chr3R:7394768	MAPQ20
DGRP362	chr3R:7394893	MAPQ20
DGRP362	chr3R:12067267	MAPQ20
DGRP362	chrX:19781160	MAPQ20
DGRP362	chrX:19781189	MAPQ20
DGRP362	chrX:21962029	MAPQ20
DGRP370	chr2L:2175354	Both
DGRP370	chr2L:5907456	Both
DGRP370	chr2L:16251833	Both
DGRP370	chr2R:5300973	Both
DGRP370	chr2R:5440960..5441043	TEMP
DGRP370	chr2R:5466506	Both
DGRP370	chr2R:7084947	Both
DGRP370	chr3L:225379	Both
DGRP370	chr3L:16948586	Both
DGRP370	chr3R:1833343	Both
DGRP370	chr3R:21862603	Both
DGRP370	chrX:3579786	Both
DGRP370	chrX:6556649	Both
DGRP370	chrX:7574480	Both
DGRP370	chrX:8575550	Both
DGRP370	chrX:10624172	Both
DGRP370	chrX:12529036	Both
DGRP370	chrX:13025089	Both
DGRP370	chrX:13305663	Both
DGRP370	chrX:13716347	Both
DGRP370	chrX:15192251	Both
DGRP370	chrX:19392171	Both
DGRP370	chrX:20925211	Both
DGRP370	chrX:21883825	Both
DGRP370	chr2L:3632190	MAPQ20
DGRP370	chr2L:5064190	MAPQ20
DGRP370	chr2R:6696437	MAPQ20
DGRP370	chr2R:9841654	MAPQ20
DGRP370	chr3L:11208524	MAPQ20
DGRP370	chrX:5968969	MAPQ20
DGRP370	chrX:14817560	MAPQ20
DGRP370	chrX:14989997	MAPQ20
DGRP370	chrX:17545471	MAPQ20
DGRP371	chr2L:3632190	Both
DGRP371	chr2L:5944657	Both
DGRP371	chr2L:6100752	Both
DGRP371	chr2L:19423571	Both
DGRP371	chr2R:9106854	Both
DGRP371	chr2R:17534106..17534319	TEMP
DGRP371	chr3L:748637	Both
DGRP371	chr3L:17414645	Both
DGRP371	chr3R:4495312	Both
DGRP371	chr3R:4495312	Both
DGRP371	chr3R:10298796	Both
DGRP371	chr3R:10307693	Both
DGRP371	chr3R:10307693	Both
DGRP371	chr3R:16967142	Both
DGRP371	chr3R:17122277	Both
DGRP371	chrX:2579595	Both
DGRP371	chrX:3636857	Both
DGRP371	chrX:6177763	Both
DGRP371	chrX:14720104	Both
DGRP371	chrX:19768867	Both
DGRP371	chrX:20201449	Both
DGRP371	chrX:20903460	Both
DGRP371	chr2L:6874414	MAPQ20
DGRP371	chr2L:22019214	MAPQ20
DGRP371	chr2R:4214650	MAPQ20
DGRP371	chr3R:10957671	MAPQ20
DGRP371	chrX:12404824	MAPQ20
DGRP373	chr2L:7249556	Both
DGRP373	chr2R:3038154	Both
DGRP373	chr2R:5724221	Both
DGRP373	chr2R:5913121	Both
DGRP373	chr3L:131806	Both
DGRP373	chr3L:699032	Both
DGRP373	chr4:227921	Both
DGRP373	chrX:7574401	Both
DGRP373	chrX:14112329	Both
DGRP373	chrX:16564854	Both
DGRP373	chrX:16588728	Both
DGRP373	chr2L:8700038	MAPQ20
DGRP373	chr3LHet:1135061	MAPQ20
DGRP373	chr3R:3317371	MAPQ20
DGRP373	chr3R:6016060	MAPQ20
DGRP373	chr3R:6998439	MAPQ20
DGRP373	chr3R:7394782	MAPQ20
DGRP373	chr3R:7586386	MAPQ20
DGRP373	chr3R:19495305	MAPQ20
DGRP373	chr4:1280674	MAPQ20
DGRP373	chrX:1130572	MAPQ20
DGRP373	chrX:18203401	MAPQ20
DGRP377	chr2L:3018390	Both
DGRP377	chr2L:16326045	Both
DGRP377	chr2L:21372745	Both
DGRP377	chr3L:4160999	Both
DGRP377	chr3L:11089997	Both
DGRP377	chr3L:19163789	Both
DGRP377	chr3R:17122279	Both
DGRP377	chr3R:18492372	Both
DGRP377	chrX:71869	Both
DGRP377	chrX:1719066	Both
DGRP377	chrX:1907131	Both
DGRP377	chrX:6526298	Both
DGRP377	chrX:12364548	Both
DGRP377	chrX:18542235	Both
DGRP377	chrX:22257104	Both
DGRP377	chr2L:2753099	MAPQ20
DGRP377	chr2L:5461563	MAPQ20
DGRP377	chr2L:13548883	MAPQ20
DGRP377	chr2R:6191559	MAPQ20
DGRP377	chr2R:16162081	MAPQ20
DGRP377	chr2R:17062733	MAPQ20
DGRP377	chr3L:5178111	MAPQ20
DGRP377	chr3L:6957858	MAPQ20
DGRP377	chr3R:18725001	MAPQ20
DGRP377	chr3R:21862605	MAPQ20
DGRP377	chrX:549853	MAPQ20
DGRP377	chrX:4830195	MAPQ20
DGRP377	chrX:7201716	MAPQ20
DGRP377	chrX:19392348	MAPQ20
DGRP377	chrX:19745463	MAPQ20
DGRP377	chrX:19781234	MAPQ20
DGRP377	chrX:21048144	MAPQ20
DGRP377	chrX:21195347	MAPQ20
DGRP377	chrX:21234146	MAPQ20
DGRP383	chr2L:3630017	Both
DGRP383	chr2L:15264721	Both
DGRP383	chr2L:15762783	Both
DGRP383	chr2L:21221219	Both
DGRP383	chr2R:2123617	Both
DGRP383	chr2R:2536134	Both
DGRP383	chr2R:4214427	Both
DGRP383	chr2R:7536257	Both
DGRP383	chr2R:11990583	Both
DGRP383	chr2R:14300296	Both
DGRP383	chr2R:14561061	Both
DGRP383	chr2R:14765873	Both
DGRP383	chr2R:15177633	Both
DGRP383	chr2R:18291370	Both
DGRP383	chr2R:20221915	Both
DGRP383	chr3L:1967893	Both
DGRP383	chr3L:1970115	Both
DGRP383	chr3L:13221730	Both
DGRP383	chr3L:14470017	Both
DGRP383	chr3L:15227509	Both
DGRP383	chr3L:19163805	Both
DGRP383	chr3R:1090610	Both
DGRP383	chr3R:9540721	Both
DGRP383	chr3R:23107711	Both
DGRP383	chrX:2412122	Both
DGRP383	chrX:6465570	Both
DGRP383	chrX:14726683	Both
DGRP383	chrX:15214909	Both
DGRP383	chrX:19584519	Both
DGRP383	chr2L:1119743	MAPQ20
DGRP383	chr2L:1185905	MAPQ20
DGRP383	chr3L:3250549	MAPQ20
DGRP383	chr3L:17965635	MAPQ20
DGRP383	chr3R:1057902	MAPQ20
DGRP383	chr3R:4035251	MAPQ20
DGRP383	chrX:13305781	MAPQ20
DGRP383	chrX:14116306	MAPQ20
DGRP383	chrX:14917896	MAPQ20
DGRP391	chr2L:479843	Both
DGRP391	chr2L:7575658	Both
DGRP391	chr2L:16251824	Both
DGRP391	chr2L:19572635	Both
DGRP391	chr2R:1310383	Both
DGRP391	chr2R:8667935	Both
DGRP391	chr3L:319734	Both
DGRP391	chr3R:11799221	Both
DGRP391	chr3R:21862629	Both
DGRP391	chr3R:26103648	Both
DGRP391	chrX:10678013	Both
DGRP391	chrX:15527517	Both
DGRP391	chrX_TAS:3683..3733	TEMP
DGRP391	chr2L:22105537	MAPQ20
DGRP391	chr2R:10194831	MAPQ20
DGRP391	chr2R:16384155	MAPQ20
DGRP391	chr3L:3892350	MAPQ20
DGRP391	chr3R:912569	MAPQ20
DGRP391	chr4:1278577	MAPQ20
DGRP391	chrX:10678628	MAPQ20
DGRP391	chrX:11897988	MAPQ20
DGRP391	chrX:19781160	MAPQ20
DGRP392	chr2L:9523044	Both
DGRP392	chr2L:20917512	Both
DGRP392	chr3R:6506712	Both
DGRP392	chr3R:20398506	Both
DGRP392	chr2L:1737432	MAPQ20
DGRP392	chr2L:15200696	MAPQ20
DGRP392	chr2L:16858466	MAPQ20
DGRP392	chr2L:19791919	MAPQ20
DGRP392	chr2R:3328238	MAPQ20
DGRP392	chr2R:12037708	MAPQ20
DGRP392	chr3L:2417414	MAPQ20
DGRP392	chr3L:9416265	MAPQ20
DGRP392	chr3R:913719	MAPQ20
DGRP392	chr3R:17431164	MAPQ20
DGRP392	chrX:13656760	MAPQ20
DGRP392	chrX:19781189	MAPQ20
DGRP405	chr2L:5000845	Both
DGRP405	chr2R:4932473	Both
DGRP405	chr3L:707896	Both
DGRP405	chr3L:11546502	Both
DGRP405	chr3L:18750367	Both
DGRP405	chr3LHet:2273636	Both
DGRP405	chr3R:632254	Both
DGRP405	chrX:13290310	Both
DGRP405	chr2L:3144812	MAPQ20
DGRP405	chr2L:10744408	MAPQ20
DGRP405	chr2L:18823559	MAPQ20
DGRP405	chr2L:20222906	MAPQ20
DGRP405	chr2R:4039787	MAPQ20
DGRP405	chr2R:17062733	MAPQ20
DGRP405	chr3L:543459	MAPQ20
DGRP405	chr3L:1101620	MAPQ20
DGRP405	chr3L:1517283	MAPQ20
DGRP405	chr3L:5348501	MAPQ20
DGRP405	chr3R:3948470	MAPQ20
DGRP405	chr3R:4720726	MAPQ20
DGRP405	chr3R:8293697	MAPQ20
DGRP405	chr3R:9882629	MAPQ20
DGRP405	chr3R:13769799	MAPQ20
DGRP405	chr3R:21463739	MAPQ20
DGRP405	chrX:2220030	MAPQ20
DGRP405	chrX:6013487	MAPQ20
DGRP405	chrX:9447288	MAPQ20
DGRP406	chr2L:21206250	Both
DGRP406	chr2L:21753679	Both
DGRP406	chr2R:18686016	Both
DGRP406	chr3L:6936619	Both
DGRP406	chr3L:16948586	Both
DGRP406	chr3L:20457926	Both
DGRP406	chrX:12560498	Both
DGRP406	chrX:14747418	Both
DGRP406	chr2L:20104765	MAPQ20
DGRP406	chr2L:22024518	MAPQ20
DGRP406	chr2R:8061871	MAPQ20
DGRP406	chr3L:1177390	MAPQ20
DGRP406	chr3L:1628371	MAPQ20
DGRP406	chr3L:3149449	MAPQ20
DGRP406	chr3L:22721228	MAPQ20
DGRP406	chr4:819783	MAPQ20
DGRP406	chrX:5234781	MAPQ20
DGRP406	chrX:8962036	MAPQ20
DGRP409	chr2L:15751681	Both
DGRP409	chr2L:20797707	Both
DGRP409	chr2R:15213098	Both
DGRP409	chr2RHet:822697	Both
DGRP409	chr3L:3199071	Both
DGRP409	chr3L:6211759	Both
DGRP409	chr3R:5062748	Both
DGRP409	chr3R:8545735	Both
DGRP409	chrX:1309486	Both
DGRP409	chrX:4578655	Both
DGRP409	chrX:20924588	Both
DGRP409	chrX:21152075	Both
DGRP409	chr2L:11045335	MAPQ20
DGRP409	chr2L:20148620	MAPQ20
DGRP409	chr2R:6439351	MAPQ20
DGRP409	chr2R:12117710	MAPQ20
DGRP409	chr2R:20221687	MAPQ20
DGRP409	chr3L:40584	MAPQ20
DGRP409	chr3L:9366751	MAPQ20
DGRP409	chr3L:9413655	MAPQ20
DGRP409	chr3R:606889	MAPQ20
DGRP409	chr3R:9620473	MAPQ20
DGRP409	chr3R:11929202	MAPQ20
DGRP409	chr3R:20963737	MAPQ20
DGRP409	chrX:12556351	MAPQ20
DGRP409	chrX:18250299	MAPQ20
DGRP409	chrX:19392252	MAPQ20
DGRP409	chrX:20201518	MAPQ20
DGRP409	chrX:20201608	MAPQ20
DGRP426	chr2L:3478331	Both
DGRP426	chr2R:15344265..15344304	TEMP
DGRP426	chr3L:11616847	Both
DGRP426	chr3L:13221625	Both
DGRP426	chr3L:15072672	Both
DGRP426	chr3L:16040007	Both
DGRP426	chr3L:16040007	Both
DGRP426	chr3L:21219006	Both
DGRP426	chr3R:4076143	Both
DGRP426	chr3R:4637994	Both
DGRP426	chr3R:13769605	Both
DGRP426	chr3R:15147911	Both
DGRP426	chr3R:25040202	Both
DGRP426	chrX:2482530	Both
DGRP426	chrX:9086672	Both
DGRP426	chrX:13128228	Both
DGRP426	chrX:14846324	Both
DGRP426	chrX:15980080	Both
DGRP426	chrX:18191837	Both
DGRP426	chr2L:1724350	MAPQ20
DGRP426	chr2L:4460937	MAPQ20
DGRP426	chr2L:13060499	MAPQ20
DGRP426	chr2L:19791590	MAPQ20
DGRP426	chr2L:20222761	MAPQ20
DGRP426	chr2R:2389083	MAPQ20
DGRP426	chr2R:2389432	MAPQ20
DGRP426	chr2R:4039787	MAPQ20
DGRP426	chr2R:4543373	MAPQ20
DGRP426	chr2R:7091248	MAPQ20
DGRP426	chr2R:8557730	MAPQ20
DGRP426	chr2R:9510512	MAPQ20
DGRP426	chr2R:10656963	MAPQ20
DGRP426	chr2R:16831207	MAPQ20
DGRP426	chr2R:17527286	MAPQ20
DGRP426	chr3L:3249950	MAPQ20
DGRP426	chr3L:14980276	MAPQ20
DGRP426	chr3R:8106578	MAPQ20
DGRP426	chr3R:18724357	MAPQ20
DGRP426	chrX:1935837	MAPQ20
DGRP426	chrX:19192535	MAPQ20
DGRP437	chr2L:3896268	Both
DGRP437	chr2L:22134305	Both
DGRP437	chr2R:7092106	Both
DGRP437	chr2R:12743978	Both
DGRP437	chr3L:628140	Both
DGRP437	chr3L:12138713	Both
DGRP437	chr3L:16106348	Both
DGRP437	chr3L:16596094	Both
DGRP437	chr3L:16799748	Both
DGRP437	chr3L:22788942	Both
DGRP437	chr3R:12975162	Both
DGRP437	chr3R:14307614	Both
DGRP437	chr3R:23384336	Both
DGRP437	chr3RHet:2184587	Both
DGRP437	chrX:2412159	Both
DGRP437	chrX:5781225	Both
DGRP437	chrX:7832679	Both
DGRP437	chrX:19745353	Both
DGRP437	chrX_TAS:3683..3733	TEMP
DGRP437	chr3R:19768846	MAPQ20
DGRP439	chr4:473777	Both
DGRP439	chr2L:2677654	MAPQ20
DGRP439	chr2L:10335052	MAPQ20
DGRP439	chr2L:13244696	MAPQ20
DGRP439	chr2R:5073872	MAPQ20
DGRP439	chr2R:9389656	MAPQ20
DGRP439	chr3L:1546375	MAPQ20
DGRP439	chr3L:6211861	MAPQ20
DGRP439	chr3L:11701635	MAPQ20
DGRP439	chr3R:14398828	MAPQ20
DGRP439	chrX:6551031	MAPQ20
DGRP439	chrX:6762314	MAPQ20
DGRP439	chrX:21234146	MAPQ20
DGRP440	chr2L:5943859	Both
DGRP440	chr2R:2760246	Both
DGRP440	chr2R:18434090..18434590	TEMP
DGRP440	chr3R:5165529	Both
DGRP440	chr3R:5178715	Both
DGRP440	chr3R:5359449	Both
DGRP440	chr3R:6715262	Both
DGRP440	chr4:1074601	Both
DGRP440	chrX:158125	Both
DGRP440	chrX:8936288	Both
DGRP440	chrX:10521605	Both
DGRP440	chr2R:5965901	MAPQ20
DGRP440	chr2R:17267479	MAPQ20
DGRP440	chr3L:708356	MAPQ20
DGRP440	chr3L:14267331	MAPQ20
DGRP440	chr3L:18833637	MAPQ20
DGRP440	chr3R:27764082	MAPQ20
DGRP440	chrX:3424828	MAPQ20
DGRP440	chrX:19561237	MAPQ20
DGRP441	chr2L:4906785	Both
DGRP441	chr2R:17494731	Both
DGRP441	chr2R:19468336	Both
DGRP441	chr2RHet:851919	Both
DGRP441	chr3L:1545830	Both
DGRP441	chr3L:15525726	Both
DGRP441	chr3L:16835376	Both
DGRP441	chr3L:17834253	Both
DGRP441	chr3L:21168850	Both
DGRP441	chr3L:22742547	Both
DGRP441	chr3R:5055316	Both
DGRP441	chr3R:5282785	Both
DGRP441	chr3R:9809268	Both
DGRP441	chr3R:10567284	Both
DGRP441	chr3R:25590068	Both
DGRP441	chrX:1870167	Both
DGRP441	chrX:10490061	Both
DGRP441	chrX:12440513	Both
DGRP441	chrX:14918448	Both
DGRP441	chrX:19536859	Both
DGRP441	chrX:19781144..19781162	TEMP
DGRP441	chr2L:3158893	MAPQ20
DGRP441	chr2L:16532995	MAPQ20
DGRP441	chr2L:17450475	MAPQ20
DGRP441	chrU:1108106	MAPQ20
DGRP441	chr2R:13738402	MAPQ20
DGRP441	chr3L:685493	MAPQ20
DGRP441	chr3L:16040007	MAPQ20
DGRP441	chr3R:7394965	MAPQ20
DGRP441	chr3R:14565827	MAPQ20
DGRP441	chrX:6769609	MAPQ20
DGRP441	chrX:15717547	MAPQ20
DGRP443	chr2L:5000845	Both
DGRP443	chr2R:17927170	Both
DGRP443	chr2R:20494740	Both
DGRP443	chr3L:14544116	Both
DGRP443	chr3R:4076137..4076146	TEMP
DGRP443	chr3R:7599674	Both
DGRP443	chr3R:18295648	Both
DGRP443	chrX:1103797	Both
DGRP443	chrX:2188636	Both
DGRP443	chrX:8942280	Both
DGRP443	chrX:13656690	Both
DGRP443	chrX:14983588	Both
DGRP443	chr2L:2494207	MAPQ20
DGRP443	chr2L:2999261	MAPQ20
DGRP443	chr2L:4394130	MAPQ20
DGRP443	chr2L:5658629	MAPQ20
DGRP443	chr2R:2759217	MAPQ20
DGRP443	chr2R:14245227	MAPQ20
DGRP443	chr3L:3893001	MAPQ20
DGRP443	chr3L:11480656	MAPQ20
DGRP443	chr3L:14625674	MAPQ20
DGRP443	chr3R:4076191	MAPQ20
DGRP443	chr3R:4880305	MAPQ20
DGRP443	chr3R:17122258	MAPQ20
DGRP443	chrX:4830207	MAPQ20
DGRP443	chrX:11812741	MAPQ20
DGRP443	chrX:14215125	MAPQ20
DGRP461	chr2R:5965844	Both
DGRP461	chr2R:7817911	Both
DGRP461	chr3L:9370469	Both
DGRP461	chr3R:3575805	Both
DGRP461	chr3R:16938150	Both
DGRP461	chrX:3582052	Both
DGRP461	chrX:18302194	Both
DGRP461	chr2L:2808247	MAPQ20
DGRP461	chr2L:8277727	MAPQ20
DGRP461	chr2L:9782375	MAPQ20
DGRP461	chr2L:20223091	MAPQ20
DGRP461	chr2R:5297145	MAPQ20
DGRP461	chr2R:11370352	MAPQ20
DGRP461	chr2R:12026217	MAPQ20
DGRP461	chr2R:12224180	MAPQ20
DGRP461	chr2R:15116475	MAPQ20
DGRP461	chr3L:639590	MAPQ20
DGRP461	chr3R:8545737	MAPQ20
DGRP461	chr3R:11075681	MAPQ20
DGRP461	chr3R:17122218	MAPQ20
DGRP461	chr4:1280674	MAPQ20
DGRP461	chrX:13880679	MAPQ20
DGRP461	chrX:15705741	MAPQ20
DGRP492	chr2L:220699	Both
DGRP492	chr2L:7573697	Both
DGRP492	chr2L:8951631	Both
DGRP492	chr2L:12507829	Both
DGRP492	chr2L:15264721	Both
DGRP492	chr2L:15762783	Both
DGRP492	chr2L:21221219	Both
DGRP492	chr2R:2123617	Both
DGRP492	chr2R:2536134	Both
DGRP492	chr2R:13451062	Both
DGRP492	chr2R:19750106	Both
DGRP492	chr2R:19750106	Both
DGRP492	chr3L:3149449	Both
DGRP492	chr3L:6211152	Both
DGRP492	chr3L:11813021	Both
DGRP492	chr3L:11813122	Both
DGRP492	chr3L:17042514	Both
DGRP492	chr3L:20097965	Both
DGRP492	chr3L:21233303	Both
DGRP492	chr3L:22401113	Both
DGRP492	chr3L:22894971	Both
DGRP492	chr3R:632297	Both
DGRP492	chr3R:14224983	Both
DGRP492	chr3R:27539024	Both
DGRP492	chr3R:27563749	Both
DGRP492	chrU:1837200..1837277	TEMP
DGRP492	chrX:2363927	Both
DGRP492	chrX:4218897	Both
DGRP492	chrX:8468319	Both
DGRP492	chrX:17208609	Both
DGRP492	chr3L:13515010	MAPQ20
DGRP492	chr3L:16884250	MAPQ20
DGRP492	chr3L:22864916	MAPQ20
DGRP492	chr3LHet:1406360	MAPQ20
DGRP492	chr3RHet:912565	MAPQ20
DGRP492	chr3R:7783457	MAPQ20
DGRP492	chrX:8819061	MAPQ20
DGRP502	chr2L:3632292	Both
DGRP502	chr2L:20311155	Both
DGRP502	chr2R:5846046	Both
DGRP502	chr2R:11888767	Both
DGRP502	chr2R:14015948	Both
DGRP502	chr2R:17066549	Both
DGRP502	chr3L:1794356	Both
DGRP502	chr3L:8056952	Both
DGRP502	chr3L:21020994	Both
DGRP502	chr3R:8545742	Both
DGRP502	chr3R:19495840	Both
DGRP502	chr3R:19520488	Both
DGRP502	chrX:4583944	Both
DGRP502	chrX:8455634	Both
DGRP502	chrX:13306916	Both
DGRP502	chrX:16542287	Both
DGRP502	chrX:19018866	Both
DGRP502	chr2L:5027517	MAPQ20
DGRP502	chr2L:5823993	MAPQ20
DGRP502	chr2L:6874414	MAPQ20
DGRP502	chr2L:7994240	MAPQ20
DGRP502	chr2L:12822166	MAPQ20
DGRP502	chr2RHet:2347501	MAPQ20
DGRP502	chr2R:20624292	MAPQ20
DGRP502	chr3L:14749848	MAPQ20
DGRP502	chr3R:9882606	MAPQ20
DGRP502	chr3R:14568586	MAPQ20
DGRP502	chr3R:15715878	MAPQ20
DGRP502	chr3R:23731698	MAPQ20
DGRP508	chr2L:5907456	Both
DGRP508	chr2L:8127702	Both
DGRP508	chr2R:12274032	Both
DGRP508	chr2R:12274032	Both
DGRP508	chr2R:12892994	Both
DGRP508	chr2R:17988001	Both
DGRP508	chr3L:16799748	Both
DGRP508	chr3R:2504345	Both
DGRP508	chrX:11812698	Both
DGRP508	chrX:14983573	Both
DGRP508	chrX:15448753	Both
DGRP508	chrX:16165166	Both
DGRP508	chrX:21048184	Both
DGRP508	chr2L:8205171	MAPQ20
DGRP508	chr2L:13550123	MAPQ20
DGRP508	chr2R:19092706	MAPQ20
DGRP508	chr3L:4692612	MAPQ20
DGRP508	chr3R:15687065	MAPQ20
DGRP508	chrX:14105587	MAPQ20
DGRP508	chrX:22134697	MAPQ20
DGRP513	chr2L:3478331	Both
DGRP513	chr2L:15333759	Both
DGRP513	chr2L:21625079	Both
DGRP513	chr2R:6560782	Both
DGRP513	chr2R:11497651	Both
DGRP513	chr2R:15344271	Both
DGRP513	chr2R:19468360	Both
DGRP513	chr2RHet:467375	Both
DGRP513	chr3L:2322571	Both
DGRP513	chr3L:2322571	Both
DGRP513	chr3L:15091837	Both
DGRP513	chr3R:4076143	Both
DGRP513	chr3R:4485350	Both
DGRP513	chr3R:14989845	Both
DGRP513	chr3R:17662516	Both
DGRP513	chrX:8819186	Both
DGRP513	chr2L:7991761	MAPQ20
DGRP513	chr2L:9938816	MAPQ20
DGRP513	chr2R:2008169	MAPQ20
DGRP513	chr2R:13606993	MAPQ20
DGRP513	chr2R:13607061	MAPQ20
DGRP513	chr2R:17533694	MAPQ20
DGRP513	chr3L:5348461	MAPQ20
DGRP513	chr3L:5684255	MAPQ20
DGRP513	chr3L:7321893	MAPQ20
DGRP513	chr3R:20545762	MAPQ20
DGRP513	chr3R:20545762	MAPQ20
DGRP513	chrX:2412127	MAPQ20
DGRP513	chrX:4098077	MAPQ20
DGRP513	chrX:7098728	MAPQ20
DGRP513	chrX:15393024	MAPQ20
DGRP513	chrX:18787691	MAPQ20
DGRP513	chrX:19781051	MAPQ20
DGRP513	chrX:20004588	MAPQ20
DGRP517	chr2R:12743965	Both
DGRP517	chr2R:16723622	Both
DGRP517	chr2R:17267032	Both
DGRP517	chr3L:11204003	Both
DGRP517	chr3L:11547892	Both
DGRP517	chr3L:22991352	Both
DGRP517	chr3R:255153	Both
DGRP517	chr3R:4523819	Both
DGRP517	chr3R:7773452	Both
DGRP517	chr3R:14743856	Both
DGRP517	chr3R:23731698	Both
DGRP517	chr3RHet:1214541	Both
DGRP517	chrX:5859846	Both
DGRP517	chrX:6802321	Both
DGRP517	chrX:13536095	Both
DGRP517	chrX:19742515	Both
DGRP517	chrX:19781160	Both
DGRP517	chr2L:12174974	MAPQ20
DGRP517	chr2L:12543390	MAPQ20
DGRP517	chr3L:7428416	MAPQ20
DGRP517	chrX:11898010	MAPQ20
DGRP517	chrX:13880502	MAPQ20
DGRP531	chr2L:222176	Both
DGRP531	chr2L:310252	Both
DGRP531	chr2L:6319199	Both
DGRP531	chr2L:15960231	Both
DGRP531	chr2R:13309665	Both
DGRP531	chr2R:19468438	Both
DGRP531	chr3L:7904707	Both
DGRP531	chr3L:9881874	Both
DGRP531	chr3L:21004175..21004287	TEMP
DGRP531	chr3R:2300390	Both
DGRP531	chr3R:4883410	Both
DGRP531	chr3R:10564779	Both
DGRP531	chr3R:13480024	Both
DGRP531	chr3R:17122258	Both
DGRP531	chr3R:27563749	Both
DGRP531	chrX:2190576	Both
DGRP531	chrX:6086685	Both
DGRP531	chrX:9004072	Both
DGRP531	chrX:11812698	Both
DGRP531	chrX:18682171	Both
DGRP531	chr3R:12061403	MAPQ20
DGRP531	chr3R:13505448	MAPQ20
DGRP531	chr3R:19857164	MAPQ20
DGRP531	chr3R:25081623	MAPQ20
DGRP531	chr3R:27539024	MAPQ20
DGRP765	chr2L:267524	Both
DGRP765	chr2R:5297222	Both
DGRP765	chr3L:1208402	Both
DGRP765	chr3L:17345058	Both
DGRP765	chr3L:19579405	Both
DGRP765	chr3R:2300390	Both
DGRP765	chr3R:23731698	Both
DGRP765	chrX:1169113	Both
DGRP765	chrX:6173358	Both
DGRP765	chrX:8819062	Both
DGRP765	chr2R:20413689	MAPQ20
DGRP765	chrX:5258422	MAPQ20
DGRP765	chrX:19557064	MAPQ20
DGRP774	chr2L:8285870..8285876	TEMP
DGRP774	chr2R:5297222	Both
DGRP774	chr2R:19551092	Both
DGRP774	chr3L:13443340	Both
DGRP774	chr3L:14755138	Both
DGRP774	chr3L:21833957	Both
DGRP774	chr3R:9809706	Both
DGRP774	chr3R:11154525	Both
DGRP774	chr3R:17123208	Both
DGRP774	chr3R:22937963	Both
DGRP774	chrX:18707303	Both
DGRP774	chr2L:1657363	MAPQ20
DGRP774	chr2L:7056325	MAPQ20
DGRP774	chr2L:15337064	MAPQ20
DGRP774	chr3R:21298814	MAPQ20
DGRP774	chr3R:25847831	MAPQ20
DGRP774	chrX:1103359	MAPQ20
DGRP774	chrX:7838463	MAPQ20
DGRP790	chr2L:5052513	Both
DGRP790	chr2L:15333766	Both
DGRP790	chr2R:10195583	Both
DGRP790	chr2R:14391135	Both
DGRP790	chr2R:16162004	Both
DGRP790	chr2R:19600623	Both
DGRP790	chr3L:12174651	Both
DGRP790	chr4:1234413	Both
DGRP790	chrU:1180147	Both
DGRP790	chrX:5971549	Both
DGRP790	chrX:6647385	Both
DGRP790	chrX:13563721	Both
DGRP790	chrX:15984865	Both
DGRP790	chrX:19781160	Both
DGRP790	chrX:22420268	Both
DGRP790	chr2L:10757245	MAPQ20
DGRP790	chr3L:11004107	MAPQ20
DGRP790	chr3L:21872650	MAPQ20
DGRP790	chr3R:22803	MAPQ20
DGRP790	chr3R:629366	MAPQ20
DGRP790	chr3R:13769799	MAPQ20
DGRP790	chr3R:23873246	MAPQ20
DGRP790	chrX:6087229	MAPQ20
DGRP790	chrX:8818830	MAPQ20
DGRP790	chrX:11898010	MAPQ20
DGRP790	chrX:13633821	MAPQ20
DGRP801	chr2R:8756452	Both
DGRP801	chr2R:15344551	Both
DGRP801	chr2R:19600623	Both
DGRP801	chr3L:8050769	Both
DGRP801	chr3L:19900320	Both
DGRP801	chr3R:27811460	Both
DGRP801	chr2L:13717348	MAPQ20
DGRP801	chr2R:14745547	MAPQ20
DGRP801	chr3L:13986651	MAPQ20
DGRP801	chr3R:3916298	MAPQ20
DGRP801	chr3R:23100547	MAPQ20
DGRP801	chrX:12097662	MAPQ20
DGRP801	chrX:17592780	MAPQ20
DGRP801	chrX:18250332	MAPQ20
DGRP801	chrX:21152282	MAPQ20
DGRP802	chr2L:15960208	Both
DGRP802	chr2L:19420192	Both
DGRP802	chr2L:20201175	Both
DGRP802	chr2LHet:254492	Both
DGRP802	chr2R:3377452	Both
DGRP802	chr2R:6762251	Both
DGRP802	chr2R:6762251	Both
DGRP802	chr2R:8756452	Both
DGRP802	chr2R:14693879	Both
DGRP802	chr2R:19600623	Both
DGRP802	chr3L:13986651	Both
DGRP802	chr3L:19900320	Both
DGRP802	chr3L:19922274	Both
DGRP802	chr3L:19922274	Both
DGRP802	chr3R:5165529	Both
DGRP802	chr3R:5178715	Both
DGRP802	chr3R:5359449	Both
DGRP802	chr3R:6715262	Both
DGRP802	chr3R:27811460	Both
DGRP802	chrX:387672	Both
DGRP802	chrX:2019648	Both
DGRP802	chrX:17592780	Both
DGRP802	chrX:21152282	Both
DGRP802	chr2L:19606343	MAPQ20
DGRP802	chr2R:4543337	MAPQ20
DGRP802	chr2R:5296994	MAPQ20
DGRP802	chr2R:6166674	MAPQ20
DGRP802	chr3L:12075082	MAPQ20
DGRP802	chr3L:13107336	MAPQ20
DGRP802	chr3L:17855035	MAPQ20
DGRP802	chr3L:22857912	MAPQ20
DGRP802	chr3R:3916298	MAPQ20
DGRP802	chr3R:4789567	MAPQ20
DGRP802	chr3R:5073001	MAPQ20
DGRP802	chr3R:5073068	MAPQ20
DGRP802	chr3R:23100547	MAPQ20
DGRP802	chrX:18250332	MAPQ20
DGRP805	chr2L:5461475	Both
DGRP805	chr2L:16351845	Both
DGRP805	chr2R:2644874	Both
DGRP805	chr2R:2927674	Both
DGRP805	chr2R:10601168	Both
DGRP805	chr3L:20191428..20191474	TEMP
DGRP805	chr3R:7430596	Both
DGRP805	chr3R:14224953	Both
DGRP805	chr3R:17122218	Both
DGRP805	chrU:1669202	Both
DGRP805	chrX:5859819	Both
DGRP805	chrX:7864955	Both
DGRP805	chrX:8819062	Both
DGRP805	chrX:13668805	Both
DGRP805	chrX:15984865	Both
DGRP805	chrX:19781160	Both
DGRP805	chrX:22420268	Both
DGRP805	chr2R:8749994	MAPQ20
DGRP805	chr2R:8922702	MAPQ20
DGRP805	chr3L:7341433	MAPQ20
DGRP805	chr3L:17038122	MAPQ20
DGRP805	chr3RHet:2336808	MAPQ20
DGRP805	chr3R:21566343	MAPQ20
DGRP805	chr4:474779	MAPQ20
DGRP805	chrX:3066533	MAPQ20
DGRP805	chrX:10220170	MAPQ20
DGRP808	chr2L:12854736	Both
DGRP808	chr2L:20175902	Both
DGRP808	chr2R:17062733	Both
DGRP808	chr3L:1586558	Both
DGRP808	chr3L:9967534	Both
DGRP808	chr3L:14544119	Both
DGRP808	chr3L:23191309	Both
DGRP808	chr3R:17123197..17123213	TEMP
DGRP808	chrX:5259199	Both
DGRP808	chrX:5313796	Both
DGRP808	chrX:7601413	Both
DGRP808	chrX:7898026	Both
DGRP808	chrX:9560590	Both
DGRP808	chrX:19192615	Both
DGRP808	chr2R:2067941	MAPQ20
DGRP808	chr3R:632950	MAPQ20
DGRP808	chr3R:6090013	MAPQ20
DGRP808	chr3R:8545600	MAPQ20
DGRP808	chr3R:14025874	MAPQ20
DGRP808	chr3R:15662602	MAPQ20
DGRP808	chr3R:17123149	MAPQ20
DGRP808	chr3R:26076678	MAPQ20
DGRP808	chrX:10239465	MAPQ20
DGRP812	chr2R:2873193	Both
DGRP812	chr2R:3034596	Both
DGRP812	chr2R:7323726	Both
DGRP812	chr3L:4786917	Both
DGRP812	chr3L:9374622	Both
DGRP812	chr3L:9498447	Both
DGRP812	chr3L:11199136	Both
DGRP812	chr3L:11245393	Both
DGRP812	chr3L:14420505..14421005	TEMP
DGRP812	chr3L:19784624	Both
DGRP812	chr3L:20191432	Both
DGRP812	chr3R:6710749	Both
DGRP812	chr3R:10549557	Both
DGRP812	chr3R:14411359	Both
DGRP812	chr3R:24152038	Both
DGRP812	chr4:924618	Both
DGRP812	chrX:5585225	Both
DGRP812	chrX:7089164	Both
DGRP812	chrX:7838845	Both
DGRP812	chrX:9178499	Both
DGRP812	chrX:16316255	Both
DGRP812	chrX:19192747	Both
DGRP812	chr3L:21128631	MAPQ20
DGRP812	chr3R:4672095	MAPQ20
DGRP812	chr3R:4721284	MAPQ20
DGRP812	chrX:7230972	MAPQ20
DGRP812	chrX:14105587	MAPQ20
DGRP822	chr2L:9237651	MAPQ20
DGRP822	chr2L:19791919	MAPQ20
DGRP822	chr2R:255248	MAPQ20
DGRP822	chr2R:6429191	MAPQ20
DGRP822	chr3L:22830150	MAPQ20
DGRP822	chr3R:912580	MAPQ20
DGRP822	chr3R:4076143	MAPQ20
DGRP822	chr3R:5046482	MAPQ20
DGRP822	chr3R:5178715	MAPQ20
DGRP822	chr3R:14677510	MAPQ20
DGRP822	chrX:11898010	MAPQ20
DGRP822	chrX:21844512	MAPQ20
DGRP855	chr2L:21221219	Both
DGRP855	chr3L:3249329	Both
DGRP855	chr3L:21273077	Both
DGRP855	chr3R:5178419	Both
DGRP855	chr3R:14919964	Both
DGRP855	chr2L:9437481	MAPQ20
DGRP855	chr2R:5331679	MAPQ20
DGRP855	chr2R:6429191	MAPQ20
DGRP855	chr3R:21341437	MAPQ20
DGRP855	chrX:387672	MAPQ20
DGRP855	chrX:1129424	MAPQ20
DGRP855	chrX:2173982	MAPQ20
DGRP855	chrX:2219928	MAPQ20
DGRP857	chr2L:2862547	Both
DGRP857	chr2L:5029534	Both
DGRP857	chr2L:13547818	Both
DGRP857	chr3R:18318850	Both
DGRP857	chrX:1935371	Both
DGRP857	chrX:17805480	Both
DGRP857	chr2L:10405035	MAPQ20
DGRP857	chr2L:12011162	MAPQ20
DGRP857	chr2L:21089165	MAPQ20
DGRP857	chr2L:21753756	MAPQ20
DGRP857	chr2R:11196551	MAPQ20
DGRP857	chr2R:16585424	MAPQ20
DGRP857	chr3L:16477270	MAPQ20
DGRP857	chr3R:5178715	MAPQ20
DGRP857	chr3R:10304393	MAPQ20
DGRP857	chr3R:17174823	MAPQ20
DGRP857	chrX:4831043	MAPQ20
DGRP857	chrX:7090077	MAPQ20
DGRP857	chrX:12462588	MAPQ20
DGRP857	chrX:12557449	MAPQ20
DGRP857	chrX:14112868	MAPQ20
DGRP882	chr2L:2109936	Both
DGRP882	chr2L:2242271	Both
DGRP882	chr2L:15960208	Both
DGRP882	chr2L:19420192	Both
DGRP882	chr2L:20201175	Both
DGRP882	chr2LHet:254492	Both
DGRP882	chr2R:3377452	Both
DGRP882	chr2R:17534115	Both
DGRP882	chr3L:1688824	Both
DGRP882	chr3L:11471422	Both
DGRP882	chr3L:20723658	Both
DGRP882	chr3L:21759381	Both
DGRP882	chr3R:3939357	Both
DGRP882	chr3R:4076143	Both
DGRP882	chr3R:4883410	Both
DGRP882	chr3R:9809657	Both
DGRP882	chr3R:9843463	Both
DGRP882	chr3R:9876739	Both
DGRP882	chr3R:19768956	Both
DGRP882	chr3R:23107712..23107758	TEMP
DGRP882	chrX:2608001	Both
DGRP882	chrX:5971549	Both
DGRP882	chrX:12097692	Both
DGRP882	chrX:15192258	Both
DGRP882	chrX:16995449	Both
DGRP882	chrX:19216162	Both
DGRP882	chrX:19996920	Both
DGRP882	chr2L:5542985	MAPQ20
DGRP882	chr3L:11208868	MAPQ20
DGRP882	chr3L:14031378	MAPQ20
DGRP882	chrX:2844672	MAPQ20
DGRP882	chrX:19781160	MAPQ20
DGRP887	chr2L:2494102	Both
DGRP887	chr2L:3631902	Both
DGRP887	chr2L:3632292	Both
DGRP887	chr2L:13666099	Both
DGRP887	chr2L:20085126	Both
DGRP887	chr2R:7492435	Both
DGRP887	chr2R:17534115	Both
DGRP887	chr2R:19331455	Both
DGRP887	chr3L:9254330	Both
DGRP887	chr3L:11471422	Both
DGRP887	chr3L:21759381	Both
DGRP887	chr3R:3939357	Both
DGRP887	chr3R:4883410	Both
DGRP887	chr3R:9809657	Both
DGRP887	chr3R:9843463	Both
DGRP887	chr3R:9876739	Both
DGRP887	chr3R:17122273	Both
DGRP887	chr3R:19768956	Both
DGRP887	chr4:855016	Both
DGRP887	chrX:2608001	Both
DGRP887	chrX:11527161	Both
DGRP887	chrX:12097692	Both
DGRP887	chrX:15191785	Both
DGRP887	chrX:15380709	Both
DGRP887	chrX:15698319	Both
DGRP887	chrX:15698319	Both
DGRP887	chrX:16227554	Both
DGRP887	chrX:16266753	Both
DGRP887	chrX:19781361	Both
DGRP887	chr2L:431102	MAPQ20
DGRP887	chr2L:13717359	MAPQ20
DGRP887	chr2L:16685230	MAPQ20
DGRP887	chr2L:16685269	MAPQ20
DGRP887	chr2R:3379992	MAPQ20
DGRP887	chr2R:6429176	MAPQ20
DGRP887	chr2R:11501143	MAPQ20
DGRP887	chr2R:17266971	MAPQ20
DGRP887	chr2R:18886458	MAPQ20
DGRP887	chr3L:11208868	MAPQ20
DGRP887	chr3L:13221472	MAPQ20
DGRP887	chr3L:19784615	MAPQ20
DGRP887	chr3R:4076132	MAPQ20
DGRP887	chr3R:4076143	MAPQ20
DGRP887	chr3R:7482408	MAPQ20
DGRP887	chr3R:11246456	MAPQ20
DGRP887	chr3R:19074742	MAPQ20
DGRP887	chrX:2844672	MAPQ20
DGRP887	chrX:7889432	MAPQ20
DGRP887	chrX:9588022	MAPQ20
DGRP887	chrX:13536118	MAPQ20
DGRP887	chrX:14103061	MAPQ20
DGRP887	chrX:14216114	MAPQ20
DGRP887	chrX:19781160	MAPQ20
DGRP892	chr2L:4463471	Both
DGRP892	chr3L:16793386	Both
DGRP892	chr3R:1219918	Both
DGRP892	chr3R:14058202	Both
DGRP892	chr2L:5029509	MAPQ20
DGRP892	chr2L:7533976	MAPQ20
DGRP892	chr2L:9152708	MAPQ20
DGRP892	chr2L:15039469	MAPQ20
DGRP892	chr2R:255248	MAPQ20
DGRP892	chr3L:17633777	MAPQ20
DGRP892	chr3L:18764773	MAPQ20
DGRP892	chr3L:18813789	MAPQ20
DGRP892	chr3L:20888472	MAPQ20
DGRP892	chr3L:22028003	MAPQ20
DGRP892	chr3L:24508411	MAPQ20
DGRP892	chr3R:11490705	MAPQ20
DGRP892	chr3R:13636835	MAPQ20
DGRP892	chr3R:25040202	MAPQ20
DGRP892	chrX:2032463	MAPQ20
DGRP892	chrX:10440884	MAPQ20
DGRP892	chrX:12649519	MAPQ20
DGRP892	chrX:16564854	MAPQ20
DGRP892	chrX:16588728	MAPQ20
DGRP894	chr2L:852849	Both
DGRP894	chr2L:14490577	Both
DGRP894	chr2L:21372745	Both
DGRP894	chr2R:2107945	Both
DGRP894	chr2R:5842871	Both
DGRP894	chrX:2200075	Both
DGRP894	chrX:3188819	Both
DGRP894	chrX:19047894	Both
DGRP894	chrX:19792335	Both
DGRP894	chr2L:455871	MAPQ20
DGRP894	chr2L:15333766	MAPQ20
DGRP894	chr2L:16690525	MAPQ20
DGRP894	chr2L:20716405	MAPQ20
DGRP894	chr2R:8667935	MAPQ20
DGRP894	chr2R:12716439	MAPQ20
DGRP894	chr3L:131784	MAPQ20
DGRP894	chr3L:3757916	MAPQ20
DGRP894	chr3R:913719	MAPQ20
DGRP894	chr3R:4050223	MAPQ20
DGRP894	chr3R:13769714	MAPQ20
DGRP894	chr3R:24984589	MAPQ20
DGRP894	chrX:2536742	MAPQ20
DGRP894	chrX:15762174	MAPQ20
DGRP907	chr2L:332187	Both
DGRP907	chr2L:7437423	Both
DGRP907	chr2L:20085126	Both
DGRP907	chr2R:15719924	Both
DGRP907	chr3L:19900320	Both
DGRP907	chrX:15191978..15192053	TEMP
DGRP907	chr2L:2885207	MAPQ20
DGRP907	chr2L:9387606	MAPQ20
DGRP907	chr2L:16685269	MAPQ20
DGRP907	chr2R:6505977	MAPQ20
DGRP907	chr3L:3757916	MAPQ20
DGRP907	chrX:6802321	MAPQ20
DGRP908	chr2L:245763	Both
DGRP908	chr2L:4249631	Both
DGRP908	chr2L:20874500	Both
DGRP908	chr2R:2628220	Both
DGRP908	chr2R:8477234	Both
DGRP908	chr2R:8540333	Both
DGRP908	chr2R:8667935	Both
DGRP908	chr2R:17534115	Both
DGRP908	chr3L:14420573	Both
DGRP908	chr3L:16040014	Both
DGRP908	chr3L:16800864	Both
DGRP908	chr3R:3190409	Both
DGRP908	chr3R:11491857	Both
DGRP908	chr3R:12105926	Both
DGRP908	chr3R:14919964	Both
DGRP908	chr3R:16783425	Both
DGRP908	chr3R:17121885	Both
DGRP908	chr3RHet:417078	Both
DGRP908	chrX:417333	Both
DGRP908	chrX:9050789	Both
DGRP908	chrX:9688563	Both
DGRP908	chrX:13171361	Both
DGRP908	chrX:19216140	Both
DGRP908	chrX:22420268	Both
DGRP908	chr2RHet:538793	MAPQ20
DGRP908	chr2R:4214809	MAPQ20
DGRP908	chr3R:14140239	MAPQ20
DGRP908	chr3R:20085333	MAPQ20
DGRP908	chr3R:21463573	MAPQ20
DGRP908	chr3R:22973886	MAPQ20
DGRP908	chrX:16244347	MAPQ20
