# Supplementary material for: Rapid evolution of piRNA-mediated silencing of an invading transposable element was driven by abundant de novo mutations
Source: HighWire-hosted journal article supplement (doi:10.1101/gr.251546.119), 2020-04-01
Supplement: Supplemental_Table_S5.xlsx [file Supplemental_Table_S5.xlsx]

## Sheet: Sheet1
Table S5. Estimation of the number of P-elements in TAS. "mean" is the average number of read pairs supporting individual non-TAS P-element insertions in a given genome. "standard deviation" is the standard deviation of reads supporting non-TAS insertions."TAS reads" is the number of P-derived reads aligned to 2R, 3R and X-TAS. If Z score is less than -1.96, we assign 0 P-element to TAS. If Z sco…
ID	Mean	Standard deviation	TAS reads	Z score	Number of P in TAS
DGRP100	67.0645	31.1266	271	6.55182	>1
DGRP101	25.9062	13.8013	42	1.16611	1
DGRP105	35.92	12.708	27	-0.70192	1
DGRP109	68.3	35.3604	70	0.0480764	1
DGRP129	26.1538	7.28206	18	-1.11972	1
DGRP136	24.1364	11.1221	27	0.257472	1
DGRP138	60.6316	46.5035	5	-1.19629	1
DGRP142	28.3571	10.3523	9	-1.86984	1
DGRP149	16.6667	5.85057	23	1.08252	1
DGRP158	12.84	4.67868	14	0.247933	1
DGRP161	30.3462	11.0161	35	0.422457	1
DGRP176	45.0909	14.2325	101	3.92828	>1
DGRP177	29	10.1767	25	-0.393055	1
DGRP181	60.2273	17.1657	229	9.83199	>1
DGRP189	51.75	16.3554	203	9.24769	>1
DGRP195	34.5556	17.2701	43	0.488963	1
DGRP208	53.3043	18.5434	129	4.08208	>1
DGRP21	27.4815	10.1123	55	2.72128	>1
DGRP217	31.8621	14.3396	57	1.75305	1
DGRP223	46.5738	18.2077	0	-2.55792	0
DGRP227	31.4222	11.3888	32	0.0507322	1
DGRP228	34.6957	11.2994	28	-0.592568	1
DGRP229	85.2917	36.3754	87	0.0469639	1
DGRP233	28.1101	13.9073	39	0.783034	1
DGRP235	16.8824	8.41786	26	1.08313	1
DGRP239	34.5	18.1037	19	-0.856178	1
DGRP256	43.3684	18.294	20	-1.27738	1
DGRP26	49.8182	17.7912	20	-1.676	1
DGRP272	22.9535	10.4834	0	-2.1895	0
DGRP280	37.5417	13.5774	4	-2.4704	0
DGRP287	14.6383	4.76594	0	-3.07144	0
DGRP301	98.0323	41.7887	103	0.118878	1
DGRP303	123	91.0743	243	1.3176	1
DGRP304	210.556	93.9596	252	0.441088	1
DGRP306	94.1613	39.7803	76	-0.45654	1
DGRP307	173.04	90.0331	402	2.54307	>1
DGRP309	22.8667	9.73346	33	1.04108	1
DGRP31	59.6667	30.9806	87	0.882273	1
DGRP310	31.6667	9.02958	58	2.91634	>1
DGRP315	134.25	43.8405	167	0.747027	1
DGRP317	22	7.07612	24	0.282641	1
DGRP318	37.973	12.8268	23	-1.16732	1
DGRP319	39.3333	23.8318	156	4.89542	>1
DGRP32	69.1538	39.214	79	0.251088	1
DGRP320	28.7391	10.0373	40	1.1219	1
DGRP321	50.3889	28.9811	15	-1.2211	1
DGRP324	194.312	98.6059	532	3.42462	>1
DGRP332	40.8333	15.957	40	-0.0522236	1
DGRP336	19.0357	10.2794	11	-0.781733	1
DGRP338	23.069	10.4606	18	-0.484578	1
DGRP340	46.9512	19.8229	148	5.09758	>1
DGRP348	50.6923	20.0275	84	1.6631	1
DGRP350	24.4783	10.3742	30	0.532256	1
DGRP352	25.6774	12.6264	25	-0.0536511	1
DGRP354	93	18.6804	62	-1.6595	1
DGRP355	80.1481	14.9607	63	-1.14621	1
DGRP356	10.2143	3.51215	80	19.8698	>1
DGRP358	13.48	4.03237	8	-1.359	1
DGRP359	20.5926	7.87527	27	0.813611	1
DGRP360	44.4348	16.5442	78	2.02882	>1
DGRP361	48.4839	17.8753	151	5.73509	>1
DGRP362	39.2	16.7033	100	3.64	>1
DGRP367	29.1111	11.3079	19	-0.894161	1
DGRP370	34.7353	14.3089	18	-1.16957	1
DGRP371	88.24	29.7353	158	2.34603	>1
DGRP373	56.9091	28.3363	231	6.14375	>1
DGRP374	27.3023	9.73588	115	9.00768	>1
DGRP375	68.3043	35.5086	32	-1.02241	1
DGRP377	25.2353	10.5142	0	-2.40011	0
DGRP378	15.2973	8.52077	48	3.838	>1
DGRP38	32.9167	11.8575	86	4.47675	>1
DGRP380	56.4091	17.3525	45	-0.657489	1
DGRP381	42.6176	18.6499	73	1.62909	1
DGRP382	42.56	10.0875	42	-0.0555145	1
DGRP383	29.8718	11.5626	39	0.78946	1
DGRP385	9.83333	3.63901	11	0.3206	1
DGRP390	37.225	17.0527	76	2.27383	>1
DGRP391	40.4762	14.1337	30	-0.74122	1
DGRP392	19	10.5008	64	4.28539	>1
DGRP393	33.7308	10.3211	67	3.22343	>1
DGRP395	74.4194	27.0577	114	1.46282	1
DGRP397	34.8333	18.2392	27	-0.429477	1
DGRP398	18.9375	7.89012	2	-2.14667	0
DGRP399	44.381	15.0149	29	-1.02438	1
DGRP40	55.2083	20.9948	38	-0.819648	1
DGRP405	15.3333	6.2573	33	2.82337	>1
DGRP406	25	11.1619	48	2.06058	>1
DGRP409	26.069	12.221	23	-0.251123	1
DGRP42	12.9565	4.40535	15	0.463863	1
DGRP426	21.225	10.8687	7	-1.30881	1
DGRP437	74	19.0438	73	-0.0525105	1
DGRP439	11.2308	5.93231	48	6.19813	>1
DGRP440	14.5556	6.16653	41	4.28838	>1
DGRP441	30.2581	9.50778	48	1.86604	1
DGRP443	24.4231	12.7473	96	5.61506	>1
DGRP45	41.5667	13.3408	90	3.63045	>1
DGRP461	18.8261	9.7545	47	2.8883	>1
DGRP48	35.3939	17.6191	61	1.45331	1
DGRP49	41.7742	15.4482	35	-0.43851	1
DGRP491	33.3939	10.4341	36	0.249763	1
DGRP492	36.027	15.1391	34	-0.133893	1
DGRP502	33.7931	14.5046	110	5.25397	>1
DGRP505	73.6296	32.0626	71	-0.0820154	1
DGRP508	33.3158	12.4769	25	-0.666496	1
DGRP509	45.4074	16.5256	0	-2.74769	0
DGRP513	19.4118	9.11914	43	2.58667	>1
DGRP517	114.591	27.8562	144	1.05575	1
DGRP528	42.52	21.4323	25	-0.817458	1
DGRP530	28.3929	10.9894	51	2.05719	>1
DGRP531	24.6667	12.1929	39	1.17555	1
DGRP535	38.6087	11.8695	46	0.622713	1
DGRP551	32.3636	12.2496	63	2.50102	>1
DGRP554	45.6364	16.5545	70	1.47172	1
DGRP555	31.1739	8.77834	52	2.37244	>1
DGRP559	32.5667	13.9301	52	1.39506	1
DGRP563	45.96	20.7515	108	2.98967	>1
DGRP566	54.5	30.9191	51	-0.113199	1
DGRP57	57.3667	33.2457	26	-0.943481	1
DGRP584	48	22.4558	365	14.1166	>1
DGRP589	44.9231	32.4936	69	0.740974	1
DGRP59	43.1905	16.4092	56	0.780631	1
DGRP591	37.7	10.6463	29	-0.817183	1
DGRP595	42.2593	16.6539	15	-1.63681	1
DGRP596	73.25	28.4173	11	-2.19057	0
DGRP627	37.7647	17.0753	27	-0.630425	1
DGRP630	21.72	11.2158	27	0.470766	1
DGRP634	31.6111	11.2047	45	1.19493	1
DGRP639	30.1304	10.3146	25	-0.497395	1
DGRP642	32.7333	16.3902	35	0.138294	1
DGRP646	27.5122	11.1223	21	-0.585507	1
DGRP69	35.9375	13.73	65	2.11672	>1
DGRP703	20.5172	6.55537	49	4.34495	>1
DGRP705	29.9444	6.35677	27	-0.463198	1
DGRP707	47.4783	16.8033	26	-1.27821	1
DGRP712	37.25	11.9511	87	4.16279	>1
DGRP714	32.8684	15.8373	25	-0.496828	1
DGRP716	26.2308	10.1442	62	3.52608	>1
DGRP721	30.6296	13.1065	51	1.55422	1
DGRP727	77.4286	35.3858	145	1.90956	1
DGRP73	38.3714	17.1586	31	-0.429606	1
DGRP732	38.5263	11.0673	64	2.3017	>1
DGRP737	19.3182	11.6553	47	2.37504	>1
DGRP738	25.0455	11.129	80	4.93795	>1
DGRP748	56.3077	16.9889	139	4.86744	>1
DGRP75	27.3	15.1524	24	-0.217787	1
DGRP757	35.1429	15.2762	38	0.187033	1
DGRP761	41.1765	19.3946	47	0.300266	1
DGRP765	52.3846	13.757	54	0.117422	1
DGRP774	86.5294	17.7169	87	0.0265615	1
DGRP776	38.3529	15.1595	35	-0.221177	1
DGRP783	39.7941	14.5785	70	2.07195	>1
DGRP787	35	15.8225	27	-0.505608	1
DGRP790	23.9615	9.41268	69	4.78487	>1
DGRP796	52.625	21.2554	38	-0.688062	1
DGRP799	39.0417	17.7114	29	-0.566961	1
DGRP801	30.6875	17.1337	1	-1.7327	1
DGRP802	54	23.1825	72	0.776448	1
DGRP804	41.7143	17.6395	23	-1.06093	1
DGRP805	41.0385	16.4255	1	-2.43757	0
DGRP808	46.2273	17.2404	0	-2.68133	0
DGRP810	47.7143	10.6373	75	2.56511	>1
DGRP812	56.5769	13.3841	36	-1.53742	1
DGRP818	39.7838	14.8233	67	1.83605	1
DGRP819	120.474	22.3939	322	8.99917	>1
DGRP820	30	11.9443	29	-0.0837218	1
DGRP821	174.806	69.2928	349	2.51388	>1
DGRP822	9.58333	4.05549	22	3.0617	>1
DGRP83	40.5	17.757	72	1.77395	1
DGRP832	11.5	3.72949	18	1.74287	1
DGRP837	15.2143	5.50661	33	3.22988	>1
DGRP843	69.5909	24.6485	31	-1.56565	1
DGRP849	59.52	24.9318	142	3.30823	>1
DGRP85	35.2712	17.9125	0	-1.96909	0
DGRP850	91.2778	28.7419	77	-0.496759	1
DGRP853	60.1111	35.5142	102	1.1795	1
DGRP855	12.4615	5.4101	14	0.284368	1
DGRP857	14.3636	5.35898	54	7.39626	>1
DGRP859	33.2	9.44582	42	0.931629	1
DGRP861	23.0435	7.18254	63	5.563	>1
DGRP879	14.6774	4.66467	9	-1.21711	1
DGRP88	30.0588	14.9728	53	1.53219	1
DGRP882	44.0968	15.1863	15	-1.91599	1
DGRP884	22.3889	10.8147	30	0.703775	1
DGRP887	23.4151	10.913	20	-0.312938	1
DGRP890	30.4643	9.35506	61	3.26408	>1
DGRP892	32.7826	15.7392	41	0.522096	1
DGRP894	20.087	10.0223	36	1.58776	1
DGRP897	59.3462	19.9699	86	1.3347	1
DGRP900	83.1	23.9847	289	8.58464	>1
DGRP907	18.1818	7.62651	19	0.107281	1
DGRP908	32.5161	14.0899	51	1.31185	1
DGRP91	41.3077	19.3407	0	-2.13579	0
DGRP911	11	5.20355	15	0.768706	1
DGRP913	58.2222	36.0142	94	0.993434	1
DGRP93	42.037	16.9376	39	-0.179307	1
