# Supplementary material for: Rapid evolution of piRNA-mediated silencing of an invading transposable element was driven by abundant de novo mutations
Source: HighWire-hosted journal article supplement (doi:10.1101/gr.251546.119), 2020-04-01
Supplement: Supplemental_Table_S6.xlsx [file Supplemental_Table_S6.xlsx]

## Sheet: Sheet1
Table S6. Identification of TAS breakpoints. 2R-TAS, 3R-TAS and X-TAS are the number of P-derived reads assigned to each of them based on edit distance method. We assigned P-element insertions to a particular TAS according to estimated number of P-element insertion in TAS (Supplemental Table S5) and the distribution of TAS reads assigned to each of TAS, which is shown in the column "which TAS". "…
ID	2R-TAS	3R-TAS	X-TAS	which TAS	edit distance	Pseudo-genome	consistent insertions	PCR verified	PCR condition	Computationally inferred	Comments
DGRP100	4	4	45	X-TAS;NA	chrX_TAS:2678:+	chrX_TAS:2851:+	NA	chrX_TAS:2678:+;chrX_TAS:2842:-	chrX_TAS:2678:+ P-enrich and TAS-XL-R1; 95°C 3 minutes; 35 cycles of 95°C 30 seconds, 64°C 30 seconds, 72°C 1.5 minutes; 72°C 10 minutes. chrX_TAS:2842:- P-element5-R1 and TAS-XL-R1 95°C 3 minutes; 35 cycles of 95°C 30 seconds, 60°C 30 seconds, 72°C 1.5 minutes; 72°C 10 minutes.	NA	MAPQ20 identified chrX_TAS:4557:+, which is homologous to chrX_TAS:2678:+.
DGRP101	2	0	32	X-TAS	chrX_TAS:3735:+	chrX_TAS:3735:+	chrX_TAS:3735:+	chrX_TAS:3735:+	chrX_TAS:3735:+ P-enrich and TAS-XL-R1; 95°C 3 minutes; 35 cycles of 95°C 30 seconds, 64°C 30 seconds, 72°C 1.5 minutes; 72°C 10 minutes.	NA
DGRP105	0	6	2	3R-TAS	NA	NA	NA	chrX_TAS:2665:+;chr3R:32073857:-	chrX_TAS:2665:+ P-enrich and TAS-XL-R1; 95°C 3 minutes; 35 cycles of 95°C 30 seconds, 64°C 30 seconds, 72°C 1.5 minutes; 72°C 10 minutes. chr3R:32073857:- P-element5-R1 and chr3R_32073398; 95°C 3 minutes; 35 cycles of 95°C 30 seconds, 60°C 30 seconds, 72°C 1.5 minutes; 72°C 10 minutes.	NA
DGRP109	11	0	0	2R-TAS	chr2R:25260119:-	NA	NA	chr2R:25258587:-	chr2R:25258587:- P-element5-R1 and chr2R_25258834; 95°C 3 minutes; 35 cycles of 95°C 30 seconds, 55-65°C gradient 30 seconds, 72°C 1.5 minutes; 72°C 10 minutes.	NA
DGRP129	0	4	0	3R-TAS	NA	NA	NA	chr2R:25258751:-	chr2R:25258751:- P-element5-R1 and chr3R_32073398; 95°C 3 minutes; 35 cycles of 95°C 30 seconds, 55°C 30 seconds, 72°C 1.5 minutes; 72°C 10 minutes.	NA
DGRP136	0	0	5	X-TAS	NA	NA	NA	chrX_TAS:3014:+	chrX_TAS:3014:+ P-enrich and TAS-XL-R1; 95°C 3 minutes; 35 cycles of 95°C 30 seconds, 64°C 30 seconds, 72°C 1.5 minutes; 72°C 10 minutes.	NA
DGRP138	0	1	2	X-TAS	NA	NA	NA	untested		NA
DGRP142	0	0	9	X-TAS	chrX_TAS:3702:+	chrX_TAS:3702:+	chrX_TAS:3702:+	chrX_TAS:3702:+	chrX_TAS:3702:+ P-enrich and TAS-XL-R1; 95°C 3 minutes; 35 cycles of 95°C 30 seconds, 64°C 30 seconds, 72°C 1.5 minutes; 72°C 10 minutes.	NA
DGRP149	0	0	9	X-TAS	NA	NA	NA	chrX_TAS:2609:+	chrX_TAS:2609:+ TAS-XL-F2 and P-element5-R1; 95°C 3 minutes; 35 cycles of 95°C 30 seconds, 60°C 30 seconds, 72°C 2 minutes; 72°C 10 minutes.	NA
DGRP158	0	3	0	3R-TAS	NA	NA	NA	chr2R:25258818:+	chr2R:25258818:+ P-enrich and chr2R_25258834; 95°C 3 minutes; 35 cycles of 95°C 30 seconds, 60°C 30 seconds, 72°C 1.5 minutes; 72°C 5 minutes.	NA
DGRP161	0	1	21	X-TAS	chrX_TAS:3714:+	NA	NA	chrX_TAS:3014:-;chr2R:25258635:-	chrX_TAS:3014:- P-enrich and chr2R_25258834; 95°C 3 minutes; 35 cycles of 95°C 30 seconds, 55-65°C gradient 30 seconds, 72°C 2 minutes; 72°C 10 minutes. chr2R:25258635:- P-element5-R1 and chr2R_25258834; 95°C 3 minutes; 35 cycles of 95°C 30 seconds, 60°C 30 seconds, 72°C 2 minutes; 72°C 10 minutes.	NA
DGRP176	6	10	8	3R-TAS;NA	NA	NA	NA	chrX_TAS:2798:+;chr2R:25258680:+	chrX_TAS:2798:+ P-enrich and TAS-XL-R1; 95°C 3 minutes; 35 cycles of 95°C 30 seconds, 60°C 30 seconds, 72°C 2 minutes; 72°C 10 minutes. chr2R:25258680:+ P-enrich and chr2R_25258834; 95°C 3 minutes; 35 cycles of 95°C 30 seconds, 60°C 30 seconds, 72°C 2 minutes; 72°C 10 minutes.	NA
DGRP177	0	0	6	X-TAS	chrX_TAS:2901:+	NA	NA	failed		NA
DGRP181	4	11	82	X-TAS;NA	chrX_TAS:3575:-	chrX_TAS:3575:-	chrX_TAS:3575:-	chrX_TAS:3014:+;chr3R:32073805:-;chrX_TAS:3575:-;chrX_TAS:3014:-	chrX_TAS:3014:+ P-enrich and TAS-XL-R1; 95°C 3 minutes; 35 cycles of 95°C 30 seconds, 64°C 30 seconds, 72°C 1.5 minutes; 72°C 10 minutes. chrX_TAS:3575:- P-element5-R1 and TAS-XL-R1 95°C 3 minutes; 35 cycles of 95°C 30 seconds, 60°C 30 seconds, 72°C 1.5 minutes; 72°C 10 minutes. chr3R:32073805:- P-element5-R1 and chr3R_32073398; 95°C 3 minutes; 35 cycles of 95°C 30 seconds, 55°C 30 seconds, 72°C …	NA	chrX_TAS:3014:+ is also supported by multiple P-derived reads.
DGRP189	0	28	92	X-TAS;NA	chrX_TAS:4022:+	chrX_TAS:3014:-	NA	chr3R:32073709:-;chrX_TAS:3695:-;chrX_TAS:4022:+	chrX_TAS:3695:- P-element5-R1 and TAS-XL-R1 95°C 3 minutes; 35 cycles of 95°C 30 seconds, 60°C 30 seconds, 72°C 1.5 minutes; 72°C 10 minutes. chr3R:32073709:- P-element5-R1 and chr3R_32073398; 95°C 3 minutes; 35 cycles of 95°C 30 seconds, 55°C 30 seconds, 72°C 1.5 minutes; 72°C 10 minutes. chrX_TAS:4022:+ P-enrich and TAS-XL-R2; 95°C 3 minutes; 35 cycles of 95°C 30 seconds, 60°C 30 seconds, 72°C …	NA	MAPQ20 identified chrX_TAS:5880:+, which is homologous to chrX_TAS:4022:+.
DGRP195	2	0	3	NA	NA	NA	NA	chr2R:25258751:+	chr2R:25258751:+ P-enrich and chr2R_25258834; 95°C 3 minutes; 35 cycles of 95°C 30 seconds, 55-65°C gradient 30 seconds, 72°C 2 minutes; 72°C 10 minutes.	NA
DGRP208	0	22	2	3R-TAS;X-TAS	chrX_TAS:2842:+	chrX_TAS:2842:+	chrX_TAS:2842:+	chr3R:32073819:-;chrX_TAS:2842:+	chr3R:32073819:- P-element5-R1 and chr3R_32073398; 95°C 3 minutes; 35 cycles of 95°C 30 seconds 65°C 30 seconds, 72°C 1.5 minutes; 72°C 10 minutes. chrX_TAS:2842:+ P-enrich andTAS-XL-R1 ; 95°C 3 minutes; 35 cycles of 95°C 30 seconds, 64°C 30 seconds, 72°C 1.5 minutes; 72°C 10 minutes.	NA
DGRP21	0	0	8	X-TAS;NA	chrX_TAS:2842:+	chrX_TAS:2842:+	chrX_TAS:2842:+	chrX_TAS:2842:+	chrX_TAS:2842:+ P-enrich and TAS-XL-R1; 95°C 3 minutes; 35 cycles of 95°C 30 seconds, 64°C 30 seconds, 72°C 1.5 minutes; 72°C 10 minutes.	NA
DGRP217	0	9	13	NA	NA	NA	NA	chr3R:32073634:-	chr3R:32073634:- P-element5-R1 and chr3R_32073398; 95°C 3 minutes; 35 cycles of 95°C 30 seconds, 55°C 30 seconds, 72°C 1.5 minutes; 72°C 10 minutes.	NA
DGRP223	0	0	0	0	NA	NA	NA	untested		NA
DGRP227	0	1	27	X-TAS	chrX_TAS:3575:+	chrX_TAS:3575:+	chrX_TAS:3575:+	chrX_TAS:3575:+	chrX_TAS:3575:+ P-enrich and TAS-XL-R1; 95°C 3 minutes; 35 cycles of 95°C 30 seconds, 64°C 30 seconds, 72°C 1.5 minutes; 72°C 10 minutes.	NA
DGRP228	0	7	1	3R-TAS	NA	NA	NA	failed		NA
DGRP229	0	0	30	X-TAS	chrX_TAS:2670:+	chrX_TAS:2670:+	chrX_TAS:2670:+	chrX_TAS:2670:+	chrX_TAS:2670:+ TAS-XL-F2 and P-element5-R1; 95°C 3 minutes; 35 cycles of 95°C 30 seconds, 60°C 30 seconds, 72°C 2 minutes; 72°C 10 minutes.	NA
DGRP233	2	8	0	3R-TAS	NA	NA	NA	untested		NA
DGRP235	0	0	0	NA	NA	NA	NA	chr2R:25258587:-	chr2R:25258587:- P-element5-R1 and chr3R_32073398; 95°C 3 minutes; 35 cycles of 95°C 30 seconds, 55°C 30 seconds, 72°C 1.5 minutes; 72°C 10 minutes.	NA
DGRP239	1	0	0	2R-TAS	NA	NA	NA	chr2R:25258587:-	chr2R:25258587:- P-element5-R1 and chr2R_25259172; 95°C 3 minutes; 35 cycles of 95°C 30 seconds, 63°C 30 seconds, 72°C 1.5 minutes; 72°C 10 minutes.	NA
DGRP256	0	0	4	X-TAS	NA	NA	NA	chrX_TAS:3695:-	chrX_TAS:3695:- P-element5-R1 and TAS-XL-R1 95°C 3 minutes; 35 cycles of 95°C 30 seconds, 60°C 30 seconds, 72°C 2 minutes; 72°C 10 minutes.	NA
DGRP26	0	0	2	X-TAS	NA	NA	NA	chrX_TAS:2670:+	chrX_TAS:2670:+ TAS-XL-F2 and P-element5-R1; 95°C 3 minutes; 35 cycles of 95°C 30 seconds, 60°C 30 seconds, 72°C 2 minutes; 72°C 10 minutes.	NA
DGRP272	0	0	0	0	NA	NA	NA	untested		NA
DGRP280	0	0	0	0	NA	NA	NA	failed		NA
DGRP287	0	0	0	0	NA	NA	NA	untested		NA
DGRP301	1	1	29	X-TAS	chrX_TAS:2670:+	chrX_TAS:2670:+	chrX_TAS:2670:+	chrX_TAS:2670:+	chrX_TAS:2670:+ P-enrich and TAS-XL-R ; 95°C 3 minutes; 35 cycles of 95°C 30 seconds, 64°C 30 seconds, 72°C 1.5 minutes; 72°C 10 minutes.	NA	MAPQ20 identified chrX_TAS:4548:+, which is homologous to chrX_TAS:2670:+
DGRP303	0	0	113	X-TAS	chrX_TAS:3700:-	chrX_TAS:3700:-	chrX_TAS:3700:-	chrX_TAS:2670:+;chrX_TAS:2670:-	chrX_TAS:2670:+ P-enrich andTAS-XL-R1 ; 95°C 3 minutes; 35 cycles of 95°C 30 seconds, 64°C 30 seconds, 72°C 1.5 minutes; 72°C 10 minutes. chrX_TAS:2670:- TAS-XL-F2 and P-enrich; 95°C 3 minutes; 35 cycles of 95°C 30 seconds, 60°C 30 seconds, 72°C 2 minutes; 72°C 10 minutes.	NA	There is two base different between PCR and computational results. chrX_TAS:3014:+ is also supported by multiple P-derived reads.
DGRP304	0	0	94	X-TAS	chrX_TAS:3014:+	chrX_TAS:3014:+	chrX_TAS:3014:+	untested		chrX_TAS:3014:+
DGRP306	0	0	34	X-TAS	chrX_TAS:3014:+	chrX_TAS:3014:+	chrX_TAS:3014:+	chrX_TAS:3014:+	chrX_TAS:3014:+ P-enrich and TAS-XL-R1; 95°C 3 minutes; 35 cycles of 95°C 30 seconds, 64°C 30 seconds, 72°C 1.5 minutes; 72°C 10 minutes.	NA
DGRP307	0	0	313	X-TAS;X-TAS	chrX_TAS:3082:+;chrX_TAS:3575:-	chrX_TAS:3082:+;chrX_TAS:3575:-	chrX_TAS:3082:+;chrX_TAS:3575:-	untested		chrX_TAS:3082:+;chrX_TAS:3575:-	MAPQ20 identified chrX_TAS:6818:+, which is homologous to chrX_TAS:3082:+
DGRP309	0	0	6	X-TAS	NA	NA	NA	chrX_TAS:3094:+	chrX_TAS:3094:+ P-enrich and TAS-XL-R1; 95°C 3 minutes; 35 cycles of 95°C 30 seconds, 50-65°C gradient 30 seconds, 72°C 2 minutes; 72°C 10 minutes.	NA
DGRP31	0	38	0	3R-TAS	NA	NA	NA	failed		NA
DGRP310	12	0	5	2R-TAS;X-TAS	chrX_TAS:2670:+	NA	NA	chrX_TAS:3014:-;chr2R:25258836:-	chrX_TAS:3014:- P-enrich and chr2R_25259172; 95°C 3 minutes; 35 cycles of 95°C 30 seconds, 60°C 30 seconds, 72°C 1.5 minutes; 72°C 10 minutes. chr2R:25258836:- P-element5-R1 and chr2R_25259172; 95°C 3 minutes; 35 cycles of 95°C 30 seconds, 60°C 30 seconds, 72°C 1.5 minutes; 72°C 10 minutes.	NA
DGRP315	19	34	2	NA	NA	NA	NA	chr2R:25258760:+	chr2R:25258760:+ P-enrich and chr2R_25258834; 95°C 3 minutes; 35 cycles of 95°C 30 seconds, 60°C 30 seconds, 72°C 1.5 minutes; 72°C 5 minutes.	NA
DGRP317	0	4	4	NA	NA	NA	NA	failed		NA
DGRP318	0	1	15	X-TAS	NA	NA	NA	chrX_TAS:3014:+	chrX_TAS:3014:+ P-enrich and TAS-XL-R1; 95°C 3 minutes; 35 cycles of 95°C 30 seconds, 64°C 30 seconds, 72°C 1.5 minutes; 72°C 10 minutes.	NA
DGRP319	8	10	17	X-TAS;NA	chrX_TAS:2842:+;chrX_TAS:2842:-	chrX_TAS:2842:-	chrX_TAS:2842:-	chrX_TAS:2842:+;chrX_TAS:2842:-	chrX_TAS:2842:+ P-enrich and TAS-XL-R1; 95°C 3 minutes; 35 cycles of 95°C 30 seconds, 64°C 30 seconds, 72°C 1.5 minutes; 72°C 10 minutes. chrX_TAS:2842:- TAS-XL-F2 and P-enrich; 95°C 3 minutes; 35 cycles of 95°C 30 seconds, 60°C 30 seconds, 72°C 2 minutes; 72°C 10 minutes.	NA
DGRP32	0	51	0	3R-TAS	NA	NA	NA	chr3R:32073784:-	chr3R:32073784:- P-element5-R1 and chr3R_32073398; 95°C 3 minutes; 35 cycles of 95°C 30 seconds, 55-65°C gradient 30 seconds, 72°C 1.5 minutes; 72°C 10 minutes.	NA
DGRP320	0	0	10	X-TAS	chrX_TAS:2670:+	chrX_TAS:2842:+	NA	failed		NA
DGRP321	0	0	15	X-TAS	chrX_TAS:3695:+	chrX_TAS:3695:+	chrX_TAS:3695:+	failed		chrX_TAS:3695:+
DGRP324	0	62	133	X-TAS;3R-TAS	chrX_TAS:3016:-	chrX_TAS:3016:-	chrX_TAS:3016:-	chrX_TAS:3021:+;chr3R:32073784:-	chrX_TAS:3021:+ P-enrich and TAS-XL-R1; 95°C 3 minutes; 35 cycles of 95°C 30 seconds, 64°C 30 seconds, 72°C 1.5 minutes; 72°C 10 minutes. chr3R:32073784:- P-element5-R1 and TAS-3R-QPCR-R1; 95°C 3 minutes; 35 cycles of 95°C 30 seconds, 60°C 30 seconds, 72°C 1.5 minutes; 72°C 10 minutes.	NA	MAPQ20 identified chrX_TAS:6757:+, which is homologous to chrX_TAS:3021:+.
DGRP332	5	0	2	2R-TAS	NA	NA	NA	chrX_TAS:2678:+	chrX_TAS:2678:+ P-enrich and TAS-XL-R1; 95°C 3 minutes; 35 cycles of 95°C 30 seconds, 60°C 30 seconds, 72°C 2 minutes; 72°C 10 minutes.	NA
DGRP336	0	1	1	NA	NA	NA	NA	chrX_TAS:3014:+	chrX_TAS:3014:+ P-element5-R1 and chr2R_25258834; 95°C 3 minutes; 35 cycles of 95°C 30 seconds, 60°C 30 seconds, 72°C 2 minutes; 72°C 10 minutes.	NA
DGRP338	0	0	6	X-TAS	NA	NA	NA	failed		NA
DGRP340	0	0	148	X-TAS;X-TAS	chrX_TAS:3595:-;chrX_TAS:3620:-	chrX_TAS:3595:-	chrX_TAS:3595:-	failed		chrX_TAS:3595:-
DGRP348	0	12	28	X-TAS	chrX_TAS:3105:+	chrX_TAS:3105:+	chrX_TAS:3105:+	chr3R:32073784:-	chr3R:32073784:- P-element5-R1 and TAS-3R-QPCR-R1; 95°C 3 minutes; 35 cycles of 95°C 30 seconds, 60°C 30 seconds, 72°C 1.5 minutes; 72°C 10 minutes.	NA
DGRP350	0	4	1	3R-TAS	NA	NA	NA	chr3R:32073784:-	chr3R:32073784:- P-element5-R1 and TAS-3R-QPCR-R1; 95°C 3 minutes; 35 cycles of 95°C 30 seconds, 60°C 30 seconds, 72°C 1.5 minutes; 72°C 10 minutes.	NA
DGRP352	0	6	0	3R-TAS	NA	NA	NA	chr3R:32073871:-	chr3R:32073871:- P-element5-R1 and chr3R_32073398; 95°C 3 minutes; 35 cycles of 95°C 30 seconds, 60°C 30 seconds, 72°C 1.5 minutes; 72°C 10 minutes.	NA
DGRP354	0	0	62	X-TAS	chrX_TAS:3695:+	chrX_TAS:3695:+	chrX_TAS:3695:+	chrX_TAS:3695:+	chrX_TAS:3695:+ P-enrich and TAS-XL-R1; 95°C 3 minutes; 35 cycles of 95°C 30 seconds, 64°C 30 seconds, 72°C 1.5 minutes; 72°C 10 minutes.	NA
DGRP355	0	0	63	X-TAS	chrX_TAS:3695:+	chrX_TAS:3695:+	chrX_TAS:3695:+	chrX_TAS:3695:+	chrX_TAS:3695:+ P-enrich and TAS-XL-R1; 95°C 3 minutes; 35 cycles of 95°C 30 seconds, 64°C 30 seconds, 72°C 1.5 minutes; 72°C 10 minutes.	NA
DGRP356	1	1	3	X-TAS;NA	NA	NA	NA	chr2R:25258728:+;chr2R:25258728:-	chr2R:25258728:+ P-enrich and chr2R_25258834; 95°C 3 minutes; 35 cycles of 95°C 30 seconds, 60°C 30 seconds, 72°C 1.5 minutes; 72°C 5 minutes. chr2R:25258728:+ P-element5-R1 and chr2R_25258834; 95°C 3 minutes; 35 cycles of 95°C 30 seconds, 60°C 30 seconds, 72°C 1.5 minutes; 72°C 5 minutes.	NA
DGRP358	0	4	0	3R-TAS	NA	NA	NA	untested	NA	NA
DGRP359	7	1	1	2R-TAS	NA	NA	NA	chrX_TAS:3014:+;chr2R:25258751:+	chrX_TAS:3014:+ P-enrich and TAS-XL-R ; 95°C 3 minutes; 35 cycles of 95°C 30 seconds, 64°C 30 seconds, 72°C 1.5 minutes; 72°C 10 minutes. chr2R:25258751:+ P-enrich and chr2R_25259172; 95°C 3 minutes; 35 cycles of 95°C 30 seconds, 60°C 30 seconds, 72°C 1.5 minutes; 72°C 10 minutes.	NA
DGRP360	0	20	9	3R-TAS;X-TAS	chrX_TAS:2806:+	chrX_TAS:2806:+	chrX_TAS:2806:+	chrX_TAS:2806:+	chrX_TAS:2806:+ P-enrich and TAS-XL-R1; 95°C 3 minutes; 35 cycles of 95°C 30 seconds, 64°C 30 seconds, 72°C 1.5 minutes; 72°C 10 minutes.	NA
DGRP361	1	50	7	3R-TAS;X-TAS	NA	NA	NA	chrX_TAS:2663:+;chr2R:25258760:+	chrX_TAS:2663:+ P-enrich and TAS-XL-R1; 95°C 3 minutes; 35 cycles of 95°C 30 seconds, 64°C 30 seconds, 72°C 1.5 minutes; 72°C 10 minutes. chr2R:25258760:+ P-enrich and chr2R_25258834; 95°C 3 minutes; 35 cycles of 95°C 30 seconds, 60°C 30 seconds, 72°C 1.5 minutes; 72°C 5 minutes.	NA
DGRP362	0	1	47	X-TAS;X-TAS	chrX_TAS:3014:-;chrX_TAS:3714:+	chrX_TAS:3014:-	chrX_TAS:3014:-	untested		chrX_TAS:3014:-
DGRP367	0	0	0	NA	NA	NA	NA	chr2R:25258760:+	chr2R:25258760:+ P-enrich and chr2R_25259172; 95°C 3 minutes; 35 cycles of 95°C 30 seconds, 60°C 30 seconds, 72°C 1.5 minutes; 72°C 10 minutes.	NA
DGRP370	0	0	3	X-TAS	NA	NA	NA	chrX_TAS:3014:+	chrX_TAS:3014:+ P-enrich and TAS-XL-R1; 95°C 3 minutes; 35 cycles of 95°C 30 seconds, 64°C 30 seconds, 72°C 1.5 minutes; 72°C 10 minutes.	NA
DGRP371	6	21	16	3R-TAS;X-TAS	chrX_TAS:2806:+	chrX_TAS:2806:+	chrX_TAS:2806:+	chr3R:32073586:-;chr2R:25258578:-;chr2R:25258578:+;	chr3R:32073586:- P-element5-R1 and TAS-3R-QPCR-R1; 95°C 3 minutes; 35 cycles of 95°C 30 seconds, 60°C 30 seconds, 72°C 1.5 minutes; 72°C 10 minutes. chr2R:25258578:- P-element5-R1 and chr2R_25258834; 95°C 3 minutes; 35 cycles of 95°C 30 seconds, 55°C 30 seconds, 72°C 1.5 minutes; 72°C 5 minutes. chr2R:25258578:+ P-enrich and chr2R_25258834; 95°C 3 minutes; 35 cycles of 95°C 30 seconds, 55°C 30 se…	NA
DGRP373	0	16	110	X-TAS;X-TAS	chrX_TAS:3714:+;chrX_TAS:2674:+	chrX_TAS:2842:-;chrX_TAS:3714:+	chrX_TAS:3714:+	chrX_TAS:3714:+	chrX_TAS:3714:+ P-enrich and TAS-XL-R1; 95°C 3 minutes; 35 cycles of 95°C 30 seconds, 60°C 30 seconds, 72°C 1.5 minutes; 72°C 10 minutes.	NA	MAPQ20 identified chrX_TAS:7452:+, which is homologous to chrX_TAS:3714:+.
DGRP374	5	12	10	3R-TAS;X-TAS	chrX_TAS:2678:+	chrX_TAS:2851:+	NA	chrX_TAS:2842:-;chr3R:32073595:+;chr3R:32073857:-	chrX_TAS:2842:- P-element5-R1 and TAS-XL-R1 95°C 3 minutes; 35 cycles of 95°C 30 seconds, 60°C 30 seconds, 72°C 1.5 minutes; 72°C 10 minutes. chr3R:32073857:- P-element5-R1 and chr3R_32073398; 95°C 3 minutes; 35 cycles of 95°C 30 seconds, 55°C 30 seconds, 72°C 1.5 minutes; 72°C 10 minutes. chr3R:32073595:+ P-enrich and chr2R_25258834; 95°C 3 minutes; 35 cycles of 95°C 30 seconds, 60°C 30 seconds,…	NA
DGRP375	0	0	18	X-TAS	chrX_TAS:3014:+;chrX_TAS:2842:+	chrX_TAS:3014:+	chrX_TAS:3014:+	failed		chrX_TAS:3014:+
DGRP377	0	0	0	0	NA	NA	NA	untested		NA
DGRP378	0	0	31	X-TAS;X-TAS	chrX_TAS:3575:-	chrX_TAS:3575:-	chrX_TAS:3575:-	untested		chrX_TAS:3575:-
DGRP38	2	8	10	X-TAS;3R-TAS	chrX_TAS:2842:+	chrX_TAS:3014:+	NA	chrX_TAS:3014:+	chrX_TAS:3014:+ P-enrich and TAS-XL-R1; 95°C 3 minutes; 35 cycles of 95°C 30 seconds, 64°C 30 seconds, 72°C 1.5 minutes; 72°C 10 minutes.	NA
DGRP380	1	0	5	X-TAS	NA	NA	NA	untested		NA
DGRP381	4	9	1	3R-TAS	NA	NA	NA	chr2R:25258760:+	chr2R:25258760:+ P-enrich and chr2R_25258834; 95°C 3 minutes; 35 cycles of 95°C 30 seconds, 60°C 30 seconds, 72°C 2 minutes; 72°C 10 minutes.	NA
DGRP382	0	0	41	X-TAS	chrX_TAS:3575:+	chrX_TAS:3575:+	chrX_TAS:3575:+	failed		chrX_TAS:3575:+
DGRP383	0	0	39	X-TAS	chrX_TAS:3570:+	chrX_TAS:3570:+	chrX_TAS:3570:+	chrX_TAS:3570:+	chrX_TAS:3570:+ P-enrich and TAS-XL-R1; 95°C 3 minutes; 35 cycles of 95°C 30 seconds, 60°C 30 seconds, 72°C 1.5 minutes; 72°C 10 minutes.	NA
DGRP385	0	0	1	X-TAS	NA	NA	NA	chrX_TAS:2978:+	chrX_TAS:2978:+ P-enrich and TAS-XL-R1; 95°C 3 minutes; 35 cycles of 95°C 30 seconds, 64°C 30 seconds, 72°C 1.5 minutes; 72°C 10 minutes.	NA
DGRP390	5	3	17	X-TAS;NA	chrX_TAS:3014:+	chrX_TAS:3014:+	chrX_TAS:3014:+	chrX_TAS:3014:+;chr3R:32073709:+	chrX_TAS:3014:+ P-enrich and TAS-XL-R1; 95°C 3 minutes; 35 cycles of 95°C 30 seconds, 60°C 30 seconds, 72°C 2 minutes; 72°C 10 minutes. chr3R:32073709:+ P-enrich and chr2R_25258834; 95°C 3 minutes; 35 cycles of 95°C 30 seconds, 60°C 30 seconds, 72°C 2 minutes; 72°C 10 minutes.	NA
DGRP391	0	0	30	X-TAS	chrX_TAS:3735:+	chrX_TAS:3735:+	chrX_TAS:3735:+	chrX_TAS:3735:+	chrX_TAS:3735:+ P-enrich and TAS-XL-R1; 95°C 3 minutes; 35 cycles of 95°C 30 seconds, 60°C 30 seconds, 72°C 1.5 minutes; 72°C 10 minutes.	NA	MAPQ20 identified chrX_TAS:3735:+
DGRP392	4	5	4	3R-TAS;NA	NA	NA	NA	failed		NA
DGRP393	0	0	14	X-TAS;NA	chrX_TAS:2842:-	chrX_TAS:2842:-	chrX_TAS:2842:-	untested		chrX_TAS:2842:-
DGRP395	6	7	19	X-TAS	chrX_TAS:2806:+	chrX_TAS:2806:+	chrX_TAS:2806:+	chrX_TAS:2978:+;chr2R:25258751:-;chr2R:25258751:+	chrX_TAS:2978:+ P-enrich and TAS-XL-R1; 95°C 3 minutes; 35 cycles of 95°C 30 seconds, 64°C 30 seconds, 72°C 1.5 minutes; 72°C 10 minutes. chr2R:25258751:- P-element5-R1 and chr3R_32073398; 95°C 3 minutes; 35 cycles of 95°C 30 seconds, 55°C 30 seconds, 72°C 1.5 minutes; 72°C 10 minutes. chr2R:25258751:+ P-enrich and chr2R_25259172; 95°C 3 minutes; 35 cycles of 95°C 30 seconds, 60°C 30 seconds, 72°…	NA
DGRP397	0	0	7	X-TAS	chrX_TAS:2922:+;chrX_TAS:2749:+	NA	NA	chrX_TAS:3596:+	chrX_TAS:3596:+ P-enrich and TAS-XL-R1; 95°C 3 minutes; 35 cycles of 95°C 30 seconds, 64°C 30 seconds, 72°C 1.5 minutes; 72°C 10 minutes.	NA
DGRP398	0	0	2	0	NA	NA	NA	untested		NA
DGRP399	2	2	1	NA	NA	NA	NA	chrX_TAS:2978:+	chrX_TAS:2978:+ P-enrich and TAS-XL-R1; 95°C 3 minutes; 35 cycles of 95°C 30 seconds, 64°C 30 seconds, 72°C 1.5 minutes; 72°C 10 minutes.	NA
DGRP40	0	21	0	3R-TAS	NA	NA	NA	chr3R:32073855:-	chr3R:32073855:- P-element5-R1 and TAS-3R-QPCR-R1; 95°C 3 minutes; 35 cycles of 95°C 30 seconds, 50-65°C 30 seconds, 72°C 1.5 minutes; 72°C 10 minutes.	NA
DGRP405	0	0	33	X-TAS;X-TAS	chrX_TAS:3206:-;chrX_TAS:3961:+	chrX_TAS:3206:-;chrX_TAS:3961:+	chrX_TAS:3206:-;chrX_TAS:3961:+	failed		chrX_TAS:3206:-;chrX_TAS:3961:+	MAPQ20 identified chrX_TAS:5816:+
DGRP406	0	0	31	X-TAS;X-TAS	chrX_TAS:3082:+;chrX_TAS:3575:-	chrX_TAS:3082:+;chrX_TAS:3575:-	chrX_TAS:3082:+;chrX_TAS:3575:-	chrX_TAS:3575:-	chrX_TAS:3575:- P-element5-R1 and TAS-XL-R1 95°C 3 minutes; 35 cycles of 95°C 30 seconds, 60°C 30 seconds, 72°C 1.5 minutes; 72°C 10 minutes.	chrX_TAS:3082:+
DGRP409	0	1	2	X-TAS	NA	NA	NA	failed		NA
DGRP42	4	0	2	2R-TAS	NA	NA	NA	chrX_TAS:3007:+;chr2R:25258760:-	chrX_TAS:3007:+ P-enrich and TAS-XL-R1; 95°C 3 minutes; 35 cycles of 95°C 30 seconds, 64°C 30 seconds, 72°C 1.5 minutes; 72°C 10 minutes. chr2R:25258760:- P-element5-R1 and chr2R_25259172; 95°C 3 minutes; 35 cycles of 95°C 30 seconds, 60°C 30 seconds, 72°C 1.5 minutes; 72°C 10 minutes.	NA
DGRP426	1	0	6	X-TAS	chrX_TAS:3998:+	NA	NA	failed		NA
DGRP437	0	0	73	X-TAS	chrX_TAS:3695:+	chrX_TAS:3695:+	chrX_TAS:3695:+	chrX_TAS:3695:+	chrX_TAS:3695:+ P-enrich andTAS-XL-R1 ; 95°C 3 minutes; 35 cycles of 95°C 30 seconds, 64°C 30 seconds, 72°C 1.5 minutes; 72°C 10 minutes.	NA
DGRP439	1	0	1	2R-TAS;X-TAS	NA	NA	NA	chr2R:25258680:-;chr2R:25258765:-	chr2R:25258680:- P-element5-R1 and chr2R_25258834; 95°C 3 minutes; 35 cycles of 95°C 30 seconds, 60°C 30 seconds, 72°C 1.5 minutes; 72°C 5 minutes. chr2R:25258765:- P-element5-R1 and chr2R_25258834; 95°C 3 minutes; 35 cycles of 95°C 30 seconds, 60°C 30 seconds, 72°C 1.5 minutes; 72°C 5 minutes.	NA
DGRP440	0	2	14	X-TAS;3R-TAS	chrX_TAS:3014:+	chrX_TAS:3014:+	chrX_TAS:3014:+	chrX_TAS:3014:+	chrX_TAS:3014:+ P-enrich and TAS-XL-R1; 95°C 3 minutes; 35 cycles of 95°C 30 seconds, 60°C 30 seconds, 72°C 2 minutes; 72°C 10 minutes.	NA
DGRP441	3	1	6	X-TAS	NA	NA	NA	chrX_TAS:3016:+;chr2R:25258696:+	chrX_TAS:3016:+ P-enrich and TAS-XL-R1; 95°C 3 minutes; 35 cycles of 95°C 30 seconds, 64°C 30 seconds, 72°C 1.5 minutes; 72°C 10 minutes. chr2R:25258696:+ P-enrich and chr2R_25258834; 95°C 3 minutes; 35 cycles of 95°C 30 seconds, 60°C 30 seconds, 72°C 1.5 minutes; 72°C 5 minutes.	NA
DGRP443	0	9	36	X-TAS;NA	chrX_TAS:3712:-	NA	NA	chr3R:32073855:-	chr3R:32073855:- P-element5-R1 and TAS-3R-QPCR-R1; 95°C 3 minutes; 35 cycles of 95°C 30 seconds, 60°C 30 seconds, 72°C 1.5 minutes; 72°C 10 minutes.	NA
DGRP45	0	20	27	X-TAS;3R-TAS	chrX_TAS:3961:+	chrX_TAS:3961:+	chrX_TAS:3961:+	chr3R:32073819:-;chrX_TAS:3206:-	chr3R:32073819:- P-element5-R1 and chr3R_32073398; 95°C 3 minutes; 35 cycles of 95°C 30 seconds, 55°C 30 seconds, 72°C 1.5 minutes; 72°C 10 minutes. chrX_TAS:3206:- P-element5-R1 and TAS-XL-R1 95°C 3 minutes; 35 cycles of 95°C 30 seconds, 50-65°C 30 seconds, 72°C 2 minutes; 72°C 10 minutes.	NA
DGRP461	0	11	0	3R-TAS;NA	NA	NA	NA	failed		NA
DGRP48	1	0	17	X-TAS	chrX_TAS:3014:+	chrX_TAS:3014:+	chrX_TAS:3014:+	chrX_TAS:3014:+	chrX_TAS:3014:+ P-enrich and TAS-XL-R1; 95°C 3 minutes; 35 cycles of 95°C 30 seconds, 60°C 30 seconds, 72°C 2 minutes; 72°C 10 minutes.	NA
DGRP49	0	7	3	3R-TAS	NA	NA	NA	untested		NA
DGRP491	0	0	9	X-TAS	NA	NA	NA	chrX_TAS:3014:+	chrX_TAS:3014:+ P-enrich and TAS-XL-R1; 95°C 3 minutes; 35 cycles of 95°C 30 seconds, 60°C 30 seconds, 72°C 2 minutes; 72°C 10 minutes.	NA
DGRP492	0	0	5	X-TAS	chrX_TAS:2670:+	NA	NA	chrX_TAS:2842:+	chrX_TAS:2842:+ P-enrich and TAS-XL-R ; 95°C 3 minutes; 35 cycles of 95°C 30 seconds, 64°C 30 seconds, 72°C 1.5 minutes; 72°C 10 minutes.	NA
DGRP502	0	19	9	3R-TAS;X-TAS	NA	NA	NA	chr3R:32073864:-;chrX_TAS:3014:+	chr3R:32073864:- P-element5-R1 and chr3R_32073398; 95°C 3 minutes; 35 cycles of 95°C 30 seconds, 60°C 30 seconds, 72°C 1.5 minutes; 72°C 10 minutes. chrX_TAS:3014:+ P-enrich and TAS-XL-R1; 95°C 3 minutes; 35 cycles of 95°C 30 seconds, 60°C 30 seconds, 72°C 1.5 minutes; 72°C 10 minutes.	NA
DGRP505	2	0	23	X-TAS	chrX_TAS:2670:+	chrX_TAS:2670:+	chrX_TAS:2670:+	failed		chrX_TAS:2670:+	MAPQ20 identified chrX_TAS:4548:+, which is homologous to chrX_TAS:2670:+
DGRP508	0	0	25	X-TAS	chrX_TAS:3714:+;chrX_TAS:3717:+	NA	NA	chrX_TAS:3714:+	chrX_TAS:3714:+ P-enrich and TAS-XL-R1; 95°C 3 minutes; 35 cycles of 95°C 30 seconds, 60°C 30 seconds, 72°C 1.5 minutes; 72°C 10 minutes.	NA
DGRP509	0	0	0	0	NA	NA	NA	failed		NA
DGRP513	0	4	0	3R-TAS;NA	NA	NA	NA	chr3R:32073634:-	chr3R:32073634:- P-element5-R1 and chr3R_32073398; 95°C 3 minutes; 35 cycles of 95°C 30 seconds, 60°C 30 seconds, 72°C 1.5 minutes; 72°C 10 minutes.	NA
DGRP517	0	16	17	NA	NA	NA	NA	chrX_TAS:2934:+;chr3R:32073634:-	chrX_TAS:2934:+ P-element5-R1 and chr3R_32073398; 95°C 3 minutes; 35 cycles of 95°C 30 seconds, 60°C 30 seconds, 72°C 1.5 minutes; 72°C 10 minutes. chr3R:32073634:- P-element5-R1 and chr3R_32073398; 95°C 3 minutes; 35 cycles of 95°C 30 seconds, 60°C 30 seconds, 72°C 1.5 minutes; 72°C 10 minutes.	NA
DGRP528	0	0	25	X-TAS	chrX_TAS:3961:+	chrX_TAS:3961:+	chrX_TAS:3961:+	chrX_TAS:3695:+	chrX_TAS:3695:+ P-enrich and TAS-XL-R1; 95°C 3 minutes; 35 cycles of 95°C 30 seconds, 64°C 30 seconds, 72°C 1.5 minutes; 72°C 10 minutes.	NA	MAPQ20 identified chrX_TAS:5816:+
DGRP530	4	4	6	X-TAS;NA	chrX_TAS:3014:+	chrX_TAS:3014:+	chrX_TAS:3014:+	chr2R:25258751:-;chr2R:25258751:+	chr2R:25258751:- P-element5-R1 and chr2R_25259172; 95°C 3 minutes; 35 cycles of 95°C 30 seconds, 63°C 30 seconds, 72°C 1.5 minutes; 72°C 10 minutes. chr2R:25258751:+ P-enrich and chr2R_25258834; 95°C 3 minutes; 35 cycles of 95°C 30 seconds, 60°C 30 seconds, 72°C 1.5 minutes; 72°C 5 minutes.	NA
DGRP531	0	0	4	X-TAS	chrX_TAS:2823:+	chrX_TAS:2823:+	chrX_TAS:2823:+	untested		chrX_TAS:2823:+
DGRP535	0	0	46	X-TAS	chrX_TAS:3695:+	chrX_TAS:3695:+	chrX_TAS:3695:+	chrX_TAS:3695:+	chrX_TAS:3695:+ P-enrich and TAS-XL-R1; 95°C 3 minutes; 35 cycles of 95°C 30 seconds, 64°C 30 seconds, 72°C 1.5 minutes; 72°C 10 minutes.	NA
DGRP551	7	3	14	X-TAS;2R-TAS	chrX_TAS:2677:+	chrX_TAS:2850:+	NA	chrX_TAS:2677:+;chr2R:25258827:+;chr3R:32073871:-	chrX_TAS:2677:+ P-enrich and TAS-XL-R1; 95°C 3 minutes; 35 cycles of 95°C 30 seconds, 64°C 30 seconds, 72°C 1.5 minutes; 72°C 10 minutes. chr2R:25258827:+ P-enrich and chr2R_25259172; 95°C 3 minutes; 35 cycles of 95°C 30 seconds, 60°C 30 seconds, 72°C 1.5 minutes; 72°C 10 minutes. chr3R:32073871:- P-element5-R1 and chr3R_32073398; 95°C 3 minutes; 35 cycles of 95°C 30 seconds, 55°C 30 seconds, 72°…	NA
DGRP554	4	0	7	NA	NA	NA	NA	untested		NA
DGRP555	0	0	10	X-TAS;NA	NA	NA	NA	chrX_TAS:3014:+;chr2R:25258760:+	chrX_TAS:3014:+ P-enrich and TAS-XL-R1; 95°C 3 minutes; 35 cycles of 95°C 30 seconds, 64°C 30 seconds, 72°C 1.5 minutes; 72°C 10 minutes. chr2R:25258760:+ P-enrich and chr2R_25258834; 95°C 3 minutes; 35 cycles of 95°C 30 seconds, 55-65°C gradient 30 seconds, 72°C 2 minutes; 72°C 10 minutes.	NA
DGRP559	0	10	2	3R-TAS	NA	NA	NA	chrX_TAS:2806:+;chr3R:32073871:-	chrX_TAS:2806:+ P-enrich and TAS-XL-R1; 95°C 3 minutes; 35 cycles of 95°C 30 seconds, 64°C 30 seconds, 72°C 1.5 minutes; 72°C 10 minutes. chr3R:32073871:- P-element5-R1 and chr3R_32073398; 95°C 3 minutes; 35 cycles of 95°C 30 seconds, 55°C 30 seconds, 72°C 1.5 minutes; 72°C 10 minutes.	NA
DGRP563	1	1	92	X-TAS;X-TAS	chrX_TAS:3575:-;chrX_TAS:3596:-	chrX_TAS:3575:-;chrX_TAS:3575:+	chrX_TAS:3575:-	failed		chrX_TAS:3575:-
DGRP566	7	10	1	NA	NA	NA	NA	chr2R:25258760:-	chr2R:25258760:- P-element5-R1 and chr2R_25259172; 95°C 3 minutes; 35 cycles of 95°C 30 seconds, 60°C 30 seconds, 72°C 1.5 minutes; 72°C 10 minutes.	NA
DGRP57	0	8	0	3R-TAS	NA	NA	NA	chr3R:32073864:+	chr3R:32073864:+ P-enrich and chr3R_32073398; 95°C 3 minutes; 35 cycles of 95°C 30 seconds, 60°C 30 seconds, 72°C 1.5 minutes; 72°C 10 minutes.	NA
DGRP584	22	68	15	3R-TAS;NA	NA	NA	NA	chrX_TAS:3014:+;chr3R:32073595:+;chr3R:32073709:+	chrX_TAS:3014:+ P-enrich and TAS-XL-R1; 95°C 3 minutes; 35 cycles of 95°C 30 seconds, 60°C 30 seconds, 72°C 2 minutes; 72°C 10 minutes. chr3R:32073595:+ P-enrich and chr2R_25258834; 95°C 3 minutes; 35 cycles of 95°C 30 seconds, 60°C 30 seconds, 72°C 2 minutes; 72°C 10 minutes. chr3R:32073595:+ P-enrich and chr2R_25258834; 95°C 3 minutes; 35 cycles of 95°C 30 seconds, 60°C 30 seconds, 72°C 2 minut…	NA
DGRP589	0	0	60	X-TAS	chrX_TAS:3082:+	chrX_TAS:3575:-	NA	chrX_TAS:3082:+	chrX_TAS:3082:+ P-enrich and TAS-XL-R1; 95°C 3 minutes; 35 cycles of 95°C 30 seconds, 60°C 30 seconds, 72°C 2 minutes; 72°C 10 minutes.	NA
DGRP59	0	11	3	3R-TAS	NA	NA	NA	chr3R:32073784:-	chr3R:32073784:- P-element5-R1 and TAS-3R-QPCR-R1; 95°C 3 minutes; 35 cycles of 95°C 30 seconds, 60°C 30 seconds, 72°C 1.5 minutes; 72°C 10 minutes.	NA
DGRP591	0	0	29	X-TAS	chrX_TAS:3583:+	chrX_TAS:3583:+	chrX_TAS:3583:+	untested		chrX_TAS:3583:+
DGRP595	0	0	6	X-TAS	chrX_TAS:2842:+	NA	NA	failed		NA
DGRP596	0	2	0	0	NA	NA	NA	failed		NA
DGRP627	0	0	24	X-TAS	chrX_TAS:3575:+	chrX_TAS:3575:+	chrX_TAS:3575:+	untested		chrX_TAS:3575:+
DGRP630	0	0	6	X-TAS	chrX_TAS:2810:+;chrX_TAS:3575:+	chrX_TAS:2810:+	chrX_TAS:2810:+	chrX_TAS:2810:+	chrX_TAS:2810:+ TAS-XL-F2 and P-element5-R1; 95°C 3 minutes; 35 cycles of 95°C 30 seconds, 60°C 30 seconds, 72°C 2 minutes; 72°C 10 minutes.	NA
DGRP634	0	7	6	NA	NA	NA	NA	failed		NA
DGRP639	0	0	1	X-TAS	NA	NA	NA	chr2R:25258760:-	chr2R:25258760:- P-element5-R1 and chr2R_25258834; 95°C 3 minutes; 35 cycles of 95°C 30 seconds, 55°C 30 seconds, 72°C 1.5 minutes; 72°C 5 minutes.	NA
DGRP642	0	0	4	X-TAS	NA	NA	NA	untested		NA
DGRP646	0	6	0	3R-TAS	NA	NA	NA	failed		NA
DGRP69	1	11	10	3R-TAS;X-TAS	NA	NA	NA	chrX_TAS:2944:+	chrX_TAS:2944:+ P-enrich and TAS-XL-R1; 95°C 3 minutes; 35 cycles of 95°C 30 seconds, 60°C 30 seconds, 72°C 2 minutes; 72°C 10 minutes.	NA
DGRP703	3	0	9	X-TAS;2R-TAS	chrX_TAS:2626:+	chrX_TAS:2626:+	chrX_TAS:2626:+	chrX_TAS:2798:+;chr2R:25258751:+	chrX_TAS:2798:+ P-enrich and TAS-XL-R1; 95°C 3 minutes; 35 cycles of 95°C 30 seconds, 64°C 30 seconds, 72°C 1.5 minutes; 72°C 10 minutes. chr2R:25258751:+ P-enrich and chr2R_25258834; 95°C 3 minutes; 35 cycles of 95°C 30 seconds, 60°C 30 seconds, 72°C 1.5 minutes; 72°C 5 minutes.	NA
DGRP705	0	0	26	X-TAS	chrX_TAS:3595:+	chrX_TAS:3595:+	chrX_TAS:3595:+	chrX_TAS:3595:+;chrX_TAS:3595:-	chrX_TAS:3595:+ P-enrich and TAS-XL-R1; 95°C 3 minutes; 35 cycles of 95°C 30 seconds, 64°C 30 seconds, 72°C 1.5 minutes; 72°C 10 minutes. chrX_TAS:3595:- P-element5-R1 and TAS-XL-R1; 95°C 3 minutes; 35 cycles of 95°C 30 seconds, 60°C 30 seconds, 72°C 1.5 minutes; 72°C 10 minutes.	NA
DGRP707	0	0	4	X-TAS	chrX_TAS:3073:+	chrX_TAS:3073:+	chrX_TAS:3073:+	chrX_TAS:3073:+	chrX_TAS:3073:+ P-enrich and TAS-XL-R1; 95°C 3 minutes; 35 cycles of 95°C 30 seconds, 64°C 30 seconds, 72°C 1.5 minutes; 72°C 10 minutes.	NA
DGRP712	0	14	47	X-TAS;NA	chrX_TAS:3082:+	chrX_TAS:3575:-	NA	chrX_TAS:3082:+;chrX_TAS:3575:-;chr3R:32073784:-	chrX_TAS:3082:+ P-enrich and TAS-XL-R1; 95°C 3 minutes; 35 cycles of 95°C 30 seconds, 64°C 30 seconds, 72°C 1.5 minutes; 72°C 10 minutes. chrX_TAS:3575:- P-element5-R1 and TAS-XL-R1 95°C 3 minutes; 35 cycles of 95°C 30 seconds, 60°C 30 seconds, 72°C 1.5 minutes; 72°C 10 minutes. chr3R:32073784:- P-element5-R1 and TAS-3R-QPCR-R1; 95°C 3 minutes; 35 cycles of 95°C 30 seconds, 60°C 30 seconds, 72°C …	NA
DGRP714	0	0	6	X-TAS	NA	NA	NA	chrX_TAS:2605:+	chrX_TAS:2605:+ TAS-XL-F2 and P-element5-R1; 95°C 3 minutes; 35 cycles of 95°C 30 seconds, 60°C 30 seconds, 72°C 2 minutes; 72°C 10 minutes.	NA
DGRP716	1	1	8	X-TAS;NA	chrX_TAS:2678:+	chrX_TAS:2581:+	NA	chrX_TAS:2678:+;chr3R:32073856:-	chrX_TAS:2678:+ P-enrich and TAS-XL-R1; 95°C 3 minutes; 35 cycles of 95°C 30 seconds, 64°C 30 seconds, 72°C 1.5 minutes; 72°C 10 minutes. chr3R:32073856:- P-element5-R1 and TAS-3R-QPCR-R1; 95°C 3 minutes; 35 cycles of 95°C 30 seconds, 60°C 30 seconds, 72°C 1.5 minutes; 72°C 10 minutes.	NA
DGRP721	0	6	25	X-TAS	chrX_TAS:3704:+	chrX_TAS:3704:+	chrX_TAS:3704:+	chrX_TAS:3704:+;chr3R:32073515:-	chrX_TAS:3704:+ P-enrich and TAS-XL-R1; 95°C 3 minutes; 35 cycles of 95°C 30 seconds, 64°C 30 seconds, 72°C 1.5 minutes; 72°C 10 minutes. chr3R:32073515:- P-element5-R1 and TAS-3R-QPCR-R1; 95°C 3 minutes; 35 cycles of 95°C 30 seconds, 60°C 30 seconds, 72°C 1.5 minutes; 72°C 10 minutes.	NA
DGRP727	0	9	18	X-TAS	chrX_TAS:3068:-	chrX_TAS:3068:-	chrX_TAS:3068:-	untested		chrX_TAS:3068:-
DGRP73	0	0	31	X-TAS	chrX_TAS:3704:+	chrX_TAS:3704:+	chrX_TAS:3704:+	chrX_TAS:3704:+	chrX_TAS:3704:+ P-enrich and TAS-XL-R1; 95°C 3 minutes; 35 cycles of 95°C 30 seconds, 64°C 30 seconds, 72°C 1.5 minutes; 72°C 10 minutes.	NA
DGRP732	5	7	0	3R-TAS;2R-TAS	NA	NA	NA	chr2R:25258594:-;chr3R:32073864:-	chr2R:25258594:- P-element5-R1 and chr2R_25259172; 95°C 3 minutes; 35 cycles of 95°C 30 seconds, 60°C 30 seconds, 72°C 1.5 minutes; 72°C 10 minutes. chr3R:32073864:- P-element5-R1 and chr3R_32073398; 95°C 3 minutes; 35 cycles of 95°C 30 seconds, 55°C 30 seconds, 72°C 1.5 minutes; 72°C 10 minutes.	NA
DGRP737	5	0	24	X-TAS;NA	NA	NA	NA	chrX_TAS:3695:+	chrX_TAS:3695:+ P-enrich and TAS-XL-R1; 95°C 3 minutes; 35 cycles of 95°C 30 seconds, 60°C 30 seconds, 72°C 2 minutes; 72°C 10 minutes.	NA
DGRP738	0	20	0	3R-TAS;NA	NA	NA	NA	chr3R:32073864:-	chr3R:32073864:- P-element5-R1 and TAS-3R-QPCR-R1; 95°C 3 minutes; 35 cycles of 95°C 30 seconds, 50-65°C 30 seconds, 72°C 1.5 minutes; 72°C 10 minutes.	NA
DGRP748	0	0	93	X-TAS;X-TAS	chrX_TAS:3575:+;chrX_TAS:2842:+	chrX_TAS:3575:+;chrX_TAS:2670:+	chrX_TAS:3575:+	chrX_TAS:3575:+;chrX_TAS:2670:+	chrX_TAS:3575:+ P-enrich and TAS-XL-R1; 95°C 3 minutes; 35 cycles of 95°C 30 seconds, 64°C 30 seconds, 72°C 1.5 minutes; 72°C 10 minutes. chrX_TAS:2670:+ TAS-XL-F2 and P-element5-R1; 95°C 3 minutes; 35 cycles of 95°C 30 seconds, 60°C 30 seconds, 72°C 2 minutes; 72°C 10 minutes.	NA	chrX_TAS:2670:+ is also supported by multiple P-derived reads.
DGRP75	0	0	3	X-TAS	NA	NA	NA	failed		NA
DGRP757	0	0	5	X-TAS	NA	NA	NA	failed		NA
DGRP761	0	1	8	X-TAS	chrX_TAS:2934:+	chrX_TAS:2934:+	chrX_TAS:2934:+	chrX_TAS:2761:+	chrX_TAS:2761:+ P-enrich and TAS-XL-R1; 95°C 3 minutes; 35 cycles of 95°C 30 seconds, 60°C 30 seconds, 72°C 2 minutes; 72°C 10 minutes.	NA
DGRP765	0	9	26	X-TAS	chrX_TAS:3695:+	chrX_TAS:3695:+	chrX_TAS:3695:+	chrX_TAS:3695:+	chrX_TAS:3695:+ P-enrich and TAS-XL-R1; 95°C 3 minutes; 35 cycles of 95°C 30 seconds, 64°C 30 seconds, 72°C 1.5 minutes; 72°C 10 minutes.	NA
DGRP774	0	0	87	X-TAS	chrX_TAS:3548:+	chrX_TAS:3548:+	chrX_TAS:3548:+	chrX_TAS:3548:+	chrX_TAS:3548:+ P-enrich and TAS-XL-R1; 95°C 3 minutes; 35 cycles of 95°C 30 seconds, 64°C 30 seconds, 72°C 1.5 minutes; 72°C 10 minutes.	NA
DGRP776	0	0	33	X-TAS	chrX_TAS:3760:+	chrX_TAS:3760:+	chrX_TAS:3760:+	chrX_TAS:3760:-	chrX_TAS:3760:- P-element5-R1 and TAS-XL-R1 95°C 3 minutes; 35 cycles of 95°C 30 seconds, 60°C 30 seconds, 72°C 2 minutes; 72°C 10 minutes.	NA
DGRP783	0	0	42	X-TAS;X-TAS	chrX_TAS:3575:-	chrX_TAS:3575:-	chrX_TAS:3575:-	chrX_TAS:3575:-	chrX_TAS:3575:- P-element5-R1 and TAS-XL-R1; 95°C 3 minutes; 35 cycles of 95°C 30 seconds, 60°C 30 seconds, 72°C 1.5 minutes; 72°C 10 minutes.	NA
DGRP787	0	0	8	X-TAS	chrX_TAS:2678:+	chrX_TAS:2678:+	chrX_TAS:2678:+	chrX_TAS:2678:+	chrX_TAS:2678:+ TAS-XL-F2 and P-element5-R1; 95°C 3 minutes; 35 cycles of 95°C 30 seconds, 60°C 30 seconds, 72°C 2 minutes; 72°C 10 minutes.	NA
DGRP790	1	6	29	X-TAS;NA	chrX_TAS:3082:+	chrX_TAS:3575:-	NA	chrX_TAS:3082:+;chr3R:32073856:-	chrX_TAS:3082:+ P-enrich and TAS-XL-R1; 95°C 3 minutes; 35 cycles of 95°C 30 seconds, 60°C 30 seconds, 72°C 2 minutes; 72°C 10 minutes. chr3R:32073856:- P-element5-R1 and TAS-3R-QPCR-R1; 95°C 3 minutes; 35 cycles of 95°C 30 seconds, 60°C 30 seconds, 72°C 1.5 minutes; 72°C 10 minutes.	NA
DGRP796	0	0	37	X-TAS	chrX_TAS:3575:+	chrX_TAS:3575:+	chrX_TAS:3575:+	chrX_TAS:3575:+	chrX_TAS:3575:+ P-enrich and TAS-XL-R1; 95°C 3 minutes; 35 cycles of 95°C 30 seconds, 64°C 30 seconds, 72°C 1.5 minutes; 72°C 10 minutes.	NA
DGRP799	0	0	7	X-TAS	chrX_TAS:2806:+	chrX_TAS:2806:+	chrX_TAS:2806:+	failed		chrX_TAS:2806:+
DGRP801	0	0	1	X-TAS	NA	NA	NA	untested		NA
DGRP802	0	0	17	X-TAS	chrX_TAS:2851:+	chrX_TAS:2851:+	chrX_TAS:2851:+	chrX_TAS:2851:+	chrX_TAS:2851:+ P-enrich and TAS-XL-R ; 95°C 3 minutes; 35 cycles of 95°C 30 seconds, 64°C 30 seconds, 72°C 1.5 minutes; 72°C 10 minutes.	NA
DGRP804	0	1	5	X-TAS	NA	NA	NA	failed		NA
DGRP805	0	0	0	0	NA	NA	NA	untested		NA
DGRP808	0	0	0	0	NA	NA	NA	failed		NA
DGRP810	0	15	7	3R-TAS;X-TAS	chrX_TAS:2837:+	chrX_TAS:2837:+	chrX_TAS:2837:+	chr3R:32073857:-	chr3R:32073857:- P-element5-R1 and TAS-3R-QPCR-R1; 95°C 3 minutes; 35 cycles of 95°C 30 seconds, 50-65°C 30 seconds, 72°C 1.5 minutes; 72°C 10 minutes.	NA
DGRP812	2	0	6	X-TAS	chrX_TAS:2665:+	chrX_TAS:2665:+	chrX_TAS:2665:+	failed		chrX_TAS:2665:+
DGRP818	0	0	6	X-TAS	NA	NA	NA	chrX_TAS:3575:-;chrX_TAS:2842:-	chrX_TAS:3575:- P-element5-R1 and TAS-XL-R1; 95°C 3 minutes; 35 cycles of 95°C 30 seconds, 60°C 30 seconds, 72°C 2 minutes; 72°C 10 minutes. chrX_TAS:2842:- TAS-XL-F2 and P-enrich; 95°C 3 minutes; 35 cycles of 95°C 30 seconds, 60°C 30 seconds, 72°C 2 minutes; 72°C 10 minutes.	NA
DGRP819	0	0	214	X-TAS;X-TAS	chrX_TAS:3082:+;chrX_TAS:3575:-	chrX_TAS:3082:+;chrX_TAS:3575:-	chrX_TAS:3082:+;chrX_TAS:3575:-	untested		chrX_TAS:3082:+;chrX_TAS:3575:-
DGRP820	1	0	0	2R-TAS	NA	NA	NA	chrX_TAS:3695:+;chr2R:25258587:+;chr2R:25258587:-	chrX_TAS:3695:+ P-enrich and TAS-XL-R1; 95°C 3 minutes; 35 cycles of 95°C 30 seconds, 64°C 30 seconds, 72°C 1.5 minutes; 72°C 10 minutes. chr2R:25258587:+ P-enrich and chr2R_25258834; 95°C 3 minutes; 35 cycles of 95°C 30 seconds, 60°C 30 seconds, 72°C 1.5 minutes; 72°C 5 minutes. chr2R:25258587:- P-element5-R1 and chr2R_25258834; 95°C 3 minutes; 35 cycles of 95°C 30 seconds, 60°C 30 seconds, 72°C…	NA
DGRP821	0	0	205	X-TAS;X-TAS	chrX_TAS:4004:+;chrX_TAS:5861:+	chrX_TAS:2670:+;chrX_TAS:4004:+	chrX_TAS:4004:+	chrX_TAS:4004:+	chrX_TAS:4004:+ P-enrich and TAS-XL-R2; 95°C 3 minutes; 35 cycles of 95°C 30 seconds, 60°C 30 seconds, 72°C 1.5 minutes; 72°C 10 minutes.	NA	MAPQ20 identified chrX_TAS:4004:+
DGRP822	0	0	6	X-TAS;NA	chrX_TAS:3688:-	chrX_TAS:3688:-	chrX_TAS:3688:-	chrX_TAS:3014:+	chrX_TAS:3014:+ P-enrich and TAS-XL-R1; 95°C 3 minutes; 35 cycles of 95°C 30 seconds, 60°C 30 seconds, 72°C 2 minutes; 72°C 10 minutes.	NA
DGRP83	1	9	10	NA	NA	NA	NA	chrX_TAS:3023:+;chr2R:25258587:-	chrX_TAS:3023:+ P-enrich and TAS-XL-R1; 95°C 3 minutes; 35 cycles of 95°C 30 seconds, 64°C 30 seconds, 72°C 1.5 minutes; 72°C 10 minutes. chr2R:25258587:- P-element5-R1 and chr3R_32073398; 95°C 3 minutes; 35 cycles of 95°C 30 seconds, 60°C 30 seconds, 72°C 1.5 minutes; 72°C 10 minutes.	NA
DGRP832	0	0	6	X-TAS	NA	NA	NA	chrX_TAS:2665:+	chrX_TAS:2665:+ P-enrich and TAS-XL-R1; 95°C 3 minutes; 35 cycles of 95°C 30 seconds, 60°C 30 seconds, 72°C 2 minutes; 72°C 10 minutes.	NA
DGRP837	0	0	0	NA;NA	NA	NA	NA	chrX_TAS:2842:-	chrX_TAS:2842:- TAS-XL-F2 and P-enrich; 95°C 3 minutes; 35 cycles of 95°C 30 seconds, 60°C 30 seconds, 72°C 2 minutes; 72°C 10 minutes.	NA
DGRP843	0	0	14	X-TAS	chrX_TAS:3014:+	chrX_TAS:3014:+	chrX_TAS:3014:+	failed		chrX_TAS:3014:+
DGRP849	0	27	19	3R-TAS;X-TAS	chrX_TAS:2916:+	chrX_TAS:2743:+	NA	untested		NA
DGRP85	0	0	0	0	NA	NA	NA	untested		NA
DGRP850	0	0	32	X-TAS	chrX_TAS:3014:+	chrX_TAS:3014:+	chrX_TAS:3014:+	failed		chrX_TAS:3014:+
DGRP853	0	0	30	X-TAS	chrX_TAS:3007:+	chrX_TAS:3007:+	chrX_TAS:3007:+	failed		chrX_TAS:3007:+
DGRP855	0	2	4	X-TAS	NA	NA	NA	failed		NA
DGRP857	7	1	9	X-TAS;2R-TAS	chrX_TAS:2678:+	NA	NA	chr2R:25258680:+	chr2R:25258680:+ P-enrich and chr2R_25258834; 95°C 3 minutes; 35 cycles of 95°C 30 seconds, 55-65°C gradient 30 seconds, 72°C 2 minutes; 72°C 10 minutes.	NA
DGRP859	2	2	10	X-TAS	chrX_TAS:3014:+	chrX_TAS:3014:+	chrX_TAS:3014:+	chrX_TAS:3014:+;chrX_TAS:3014:-	chrX_TAS:3014:+ P-enrich and TAS-XL-R1; 95°C 3 minutes; 35 cycles of 95°C 30 seconds, 64°C 30 seconds, 72°C 1.5 minutes; 72°C 10 minutes. chrX_TAS:3014:- P-enrich and chr2R_25258834; 95°C 3 minutes; 35 cycles of 95°C 30 seconds, 55°C 30 seconds, 72°C 1.5 minutes; 72°C 5 minutes.	NA
DGRP861	1	8	2	3R-TAS;X-TAS	NA	NA	NA	chrX_TAS:2665:+;chr3R:32073784:-	chrX_TAS:2665:+ P-enrich and TAS-XL-R1; 95°C 3 minutes; 35 cycles of 95°C 30 seconds, 64°C 30 seconds, 72°C 1.5 minutes; 72°C 10 minutes. chr3R:32073784:- P-element5-R1 and chr3R_32073398; 95°C 3 minutes; 35 cycles of 95°C 30 seconds, 55°C 30 seconds, 72°C 1.5 minutes; 72°C 10 minutes.	NA
DGRP879	0	0	1	X-TAS	NA	NA	NA	chrX_TAS:3014:+	chrX_TAS:3014:+ P-enrich and TAS-XL-R1; 95°C 3 minutes; 35 cycles of 95°C 30 seconds, 64°C 30 seconds, 72°C 1.5 minutes; 72°C 10 minutes.	NA
DGRP88	0	6	35	X-TAS	chrX_TAS:3695:+	chrX_TAS:3695:+	chrX_TAS:3695:+	chrX_TAS:3695:+;chr3R:32073595:-	chrX_TAS:3695:+ P-enrich and TAS-XL-R1; 95°C 3 minutes; 35 cycles of 95°C 30 seconds, 64°C 30 seconds, 72°C 1.5 minutes; 72°C 10 minutes. chr3R:32073595:- P-element5-R1 and TAS-3R-QPCR-R1; 95°C 3 minutes; 35 cycles of 95°C 30 seconds, 50-65°C 30 seconds, 72°C 1.5 minutes; 72°C 10 minutes.	NA
DGRP882	0	0	0	NA	NA	NA	NA	chrX_TAS:2851:+	chrX_TAS:2851:+ P-enrich and TAS-XL-R1; 95°C 3 minutes; 35 cycles of 95°C 30 seconds, 64°C 30 seconds, 72°C 1.5 minutes; 72°C 10 minutes.	NA
DGRP884	0	0	30	X-TAS	chrX_TAS:3963:+	chrX_TAS:3963:+	chrX_TAS:3963:+	untested		chrX_TAS:3963:+
DGRP887	0	0	1	X-TAS	NA	NA	NA	chrX_TAS:2851:+	chrX_TAS:2851:+ P-enrich and TAS-XL-R1; 95°C 3 minutes; 35 cycles of 95°C 30 seconds, 64°C 30 seconds, 72°C 1.5 minutes; 72°C 10 minutes.	NA
DGRP890	0	3	30	X-TAS;3R-TAS	chrX_TAS:3575:+	chrX_TAS:3575:+	chrX_TAS:3575:+	chrX_TAS:3575:+	chrX_TAS:3575:+ P-enrich and TAS-XL-R1; 95°C 3 minutes; 35 cycles of 95°C 30 seconds, 64°C 30 seconds, 72°C 1.5 minutes; 72°C 10 minutes.	NA
DGRP892	0	0	14	X-TAS	chrX_TAS:2873:+	chrX_TAS:2700:+	NA	chrX_TAS:2851:+	chrX_TAS:2851:+ P-enrich and TAS-XL-R1; 95°C 3 minutes; 35 cycles of 95°C 30 seconds, 64°C 30 seconds, 72°C 1.5 minutes; 72°C 10 minutes.	NA
DGRP894	0	0	8	X-TAS	chrX_TAS:3073:+	chrX_TAS:3073:+	chrX_TAS:3073:+	chrX_TAS:3073:+	chrX_TAS:3073:+ P-enrich and TAS-XL-R1; 95°C 3 minutes; 35 cycles of 95°C 30 seconds, 64°C 30 seconds, 72°C 1.5 minutes; 72°C 10 minutes.	NA
DGRP897	2	0	11	X-TAS	chrX_TAS:2851:+	chrX_TAS:2851:+	chrX_TAS:2851:+	chrX_TAS:2851:+;chr2R:25258587:+	chrX_TAS:2851:+ P-enrich and TAS-XL-R1; 95°C 3 minutes; 35 cycles of 95°C 30 seconds, 64°C 30 seconds, 72°C 1.5 minutes; 72°C 10 minutes. chr2R:25258587:+ P-enrich and chr2R_25258834; 95°C 3 minutes; 35 cycles of 95°C 30 seconds, 60°C 30 seconds, 72°C 1.5 minutes; 72°C 5 minutes.	NA
DGRP900	0	41	128	X-TAS;NA	chrX_TAS:3575:-	chrX_TAS:3575:-	chrX_TAS:3575:-	chrX_TAS:3082:+	chrX_TAS:3082:+ P-enrich and TAS-XL-R1; 95°C 3 minutes; 35 cycles of 95°C 30 seconds, 60°C 30 seconds, 72°C 2 minutes; 72°C 10 minutes.	NA
DGRP907	0	0	1	X-TAS	NA	NA	NA	chrX_TAS:2939:+	chrX_TAS:2939:+ P-enrich and TAS-XL-R1; 95°C 3 minutes; 35 cycles of 95°C 30 seconds, 64°C 30 seconds, 72°C 1.5 minutes; 72°C 10 minutes.	NA
DGRP908	6	17	1	3R-TAS	NA	NA	NA	chr2R:25258751:-;chr3R:32073586:-	chr2R:25258751:- P-element5-R1 and chr2R_25259172; 95°C 3 minutes; 35 cycles of 95°C 30 seconds, 60°C 30 seconds, 72°C 1.5 minutes; 72°C 10 minutes. chr3R:32073586:- P-element5-R1 and TAS-3R-QPCR-R1; 95°C 3 minutes; 35 cycles of 95°C 30 seconds, 60°C 30 seconds, 72°C 1.5 minutes; 72°C 10 minutes.	NA
DGRP91	0	0	0	0	NA	NA	NA	failed		NA
DGRP911	0	0	15	X-TAS	chrX_TAS:3695:+	chrX_TAS:3695:+	chrX_TAS:3695:+	chrX_TAS:3695:+	chrX_TAS:3695:+ P-enrich and TAS-XL-R1; 95°C 3 minutes; 35 cycles of 95°C 30 seconds, 64°C 30 seconds, 72°C 1.5 minutes; 72°C 10 minutes.	NA
DGRP913	0	0	25	X-TAS	chrX_TAS:2806:+	chrX_TAS:2806:+	chrX_TAS:2806:+	failed		chrX_TAS:2806:+
DGRP93	0	0	39	X-TAS	chrX_TAS:3561:+	chrX_TAS:3561:+	chrX_TAS:3561:+	chrX_TAS:3575:+	chrX_TAS:3575:+ P-enrich and TAS-XL-R1; 95°C 3 minutes; 35 cycles of 95°C 30 seconds, 64°C 30 seconds, 72°C 1.5 minutes; 72°C 10 minutes.	NA	chrX_TAS:3575:+ is also supported by multiple P-derived reads
