# Supplementary material for: Rapid evolution of piRNA-mediated silencing of an invading transposable element was driven by abundant de novo mutations
Source: HighWire-hosted journal article supplement (doi:10.1101/gr.251546.119), 2020-04-01
Supplement: Supplemental_Table_S7.xlsx [file Supplemental_Table_S7.xlsx]

## Sheet: Sheet1
Table S7. non-TAS P-elements in ancestral piRNA clusters.
# of annotated piRNA clusters	piRNA cluster	breakpoints	DGRP
32	chr2L:4453828..4461990	chr2L:4460937:+	DGRP426
	chr2R:25256000..25264024	chr2R:25257571:-	DGRP595
	chr2R:6393001..6464026	chr2R:6436042:-	DGRP32
	chr2R:9553098..9556747	chr2R:9553471:-	DGRP38
	chr3L:1397345..1401875	chr3L:1401752:-	DGRP716
	chr3L:638019..646696	chr3L:639590:+	DGRP461
	chrX:21632003..21641023	chrX:21634312:-	DGRP716
	chr2L:20146109..20156021	chr2L:20148601:-	DGRP317
	chr2L:20146109..20156021	chr2L:20148620:+	DGRP409
	chr2R:20582088..20587146	chr2R:20582751:-	DGRP181
	chr2R:20582088..20587146	chr2R:20584450:+	DGRP303
	chr2R:20582088..20587146	chr2R:20582178:+	DGRP843
	chr2L:19565043..19573972	chr2L:19572042:+	DGRP223
	chr2L:19565043..19573972	chr2L:19572728:+	DGRP307
	chr2L:19565043..19573972	chr2L:19572635:-	DGRP391
	chr2L:19565043..19573972	chr2L:19572772:-	DGRP91
	chr2L:19565043..19573972	chr2L:19571975:-	DGRP233;DGRP338;DGRP584
	chr2L:20103015..20111026	chr2L:20104738:-	DGRP149
	chr2L:20103015..20111026	chr2L:20104910:-	DGRP596
	chr2L:20103015..20111026	chr2L:20104765:-	DGRP315;DGRP406;DGRP505;DGRP796;DGRP93
	chr2R:16827006..16835930	chr2R:16828873:-	DGRP217
	chr2R:16827006..16835930	chr2R:16828688:+	DGRP223
	chr2R:16827006..16835930	chr2R:16829085:-	DGRP233
	chr2R:16827006..16835930	chr2R:16829080:+	DGRP256
	chr2R:16827006..16835930	chr2R:16829080:-	DGRP303
	chr2R:16827006..16835930	chr2R:16828952:-	DGRP378
	chr2R:16827006..16835930	chr2R:16829042:+	DGRP509
	chr2R:16827006..16835930	chr2R:16828934:+	DGRP894
	chr2R:16827006..16835930	chr2R:16828726:+	DGRP177;DGRP324
	chr2R:16827006..16835930	chr2R:16830434:-	DGRP390;DGRP57
159	chr2L:4453828..4461990	chr2L:4460937:+	DGRP426
	chr2R:25251000..25285023	chr2R:25257571:-	DGRP595
	chr3L:1394017..1402992	chr3L:1401752:-	DGRP716
	chr3L:26022002..26030000	chr3L:26023661:+	DGRP492
	chr3L:26570000..26581989	chr3L:26570798:+	DGRP535
	chr3L:638015..646696	chr3L:639590:+	DGRP461
	chr3R:15413010..15421962	chr3R:15420734:-	DGRP887
	chr3R:5622185..5629554	chr3R:5624109:-	DGRP589
	chr2R:6482001..6493959	chr2R:6482550:-	DGRP223
	chr2R:6482001..6493959	chr2R:6482695:+	DGRP375
	chr2R:9551096..9556747	chr2R:9552434:+	DGRP223
	chr2R:9551096..9556747	chr2R:9553471:-	DGRP38
	chr3L:19861019..19868905	chr3L:19861472:+	DGRP227
	chr3L:19861019..19868905	chr3L:19861443:-	DGRP911
	chr2R:20582088..20588749	chr2R:20582751:-	DGRP181
	chr2R:20582088..20588749	chr2R:20584450:+	DGRP303
	chr2R:20582088..20588749	chr2R:20582178:+	DGRP843
	chrX:21631186..21676025	chrX:21631857:+	DGRP320
	chrX:21631186..21676025	chrX:21631570:+	DGRP359
	chrX:21631186..21676025	chrX:21634312:-	DGRP716
	chrX:21631186..21676025	chrX:21631582:-	DGRP721
	chr2R:6256021..6472023	chr2R:6436042:-	DGRP32
	chr2R:6256021..6472023	chr2R:6258918:+	DGRP535
	chr2R:6256021..6472023	chr2R:6267506:+	DGRP73
	chr2R:6256021..6472023	chr2R:6470389:-	DGRP303;DGRP306
	chr2L:19565043..19574709	chr2L:19572042:+	DGRP223
	chr2L:19565043..19574709	chr2L:19572728:+	DGRP307
	chr2L:19565043..19574709	chr2L:19572635:-	DGRP391
	chr2L:19565043..19574709	chr2L:19572772:-	DGRP91
	chr2L:19565043..19574709	chr2L:19571975:-	DGRP233;DGRP338;DGRP584
	chr3R:29213303..29222023	chr3R:29214451:-	DGRP181
	chr3R:29213303..29222023	chr3R:29213829:+	DGRP223
	chr3R:29213303..29222023	chr3R:29213796:+	DGRP382
	chr3R:29213303..29222023	chr3R:29215838:+	DGRP57
	chr3R:29213303..29222023	chr3R:29217649:+	DGRP227;DGRP91
	chr3R:29213303..29222023	chr3R:29214480:-	DGRP426;DGRP892
	chr2L:20101033..20120017	chr2L:20104738:-	DGRP149
	chr2L:20101033..20120017	chr2L:20118276:-	DGRP21
	chr2L:20101033..20120017	chr2L:20104910:-	DGRP596
	chr2L:20101033..20120017	chr2L:20117418:-	DGRP208;DGRP223
	chr2L:20101033..20120017	chr2L:20118296:-	DGRP304;DGRP310
	chr2L:20101033..20120017	chr2L:20104765:-	DGRP315;DGRP406;DGRP505;DGRP796;DGRP93
	chr2R:16827006..16835930	chr2R:16828873:-	DGRP217
	chr2R:16827006..16835930	chr2R:16828688:+	DGRP223
	chr2R:16827006..16835930	chr2R:16829085:-	DGRP233
	chr2R:16827006..16835930	chr2R:16829080:+	DGRP256
	chr2R:16827006..16835930	chr2R:16829080:-	DGRP303
	chr2R:16827006..16835930	chr2R:16828952:-	DGRP378
	chr2R:16827006..16835930	chr2R:16829042:+	DGRP509
	chr2R:16827006..16835930	chr2R:16828934:+	DGRP894
	chr2R:16827006..16835930	chr2R:16828726:+	DGRP177;DGRP324
	chr2R:16827006..16835930	chr2R:16830434:-	DGRP390;DGRP57
	chr2L:20145009..20224018	chr2L:20222906:-	DGRP227
	chr2L:20145009..20224018	chr2L:20209281:-	DGRP307
	chr2L:20145009..20224018	chr2L:20148601:-	DGRP317
	chr2L:20145009..20224018	chr2L:20222906:+	DGRP405
	chr2L:20145009..20224018	chr2L:20148620:+	DGRP409
	chr2L:20145009..20224018	chr2L:20222761:+	DGRP426
	chr2L:20145009..20224018	chr2L:20223091:+	DGRP461
	chr2L:20145009..20224018	chr2L:20176715:+	DGRP59
	chr2L:20145009..20224018	chr2L:20176731:-	DGRP69
	chr2L:20145009..20224018	chr2L:20172415:-	DGRP721
	chr2L:20145009..20224018	chr2L:20175902:-	DGRP808
	chr2L:20145009..20224018	chr2L:20222933:+	DGRP849
	chr2L:20145009..20224018	chr2L:20169174:-	DGRP853
	chr2L:20145009..20224018	chr2L:20201175:+	DGRP802;DGRP810;DGRP882
497	chr2L:4453162..4461990	chr2L:4460937:+	DGRP426
	chr2R:12166005..12174999	chr2R:12174366:-	DGRP406
	chr2R:20602012..20610602	chr2R:20602858:-	DGRP799
	chr2R:25249234..25286929	chr2R:25257571:-	DGRP595
	chr3L:1393074..1405607	chr3L:1401752:-	DGRP716
	chr3L:22616249..22626483	chr3L:22617080:-	DGRP911
	chr3L:23549084..23554933	chr3L:23554883:-	DGRP884
	chr3L:26021009..26031023	chr3L:26023661:+	DGRP492
	chr3L:28001..39020	chr3L:34247:+	DGRP374
	chr3L:638015..646696	chr3L:639590:+	DGRP461
	chr3R:15413010..15421962	chr3R:15420734:-	DGRP887
	chr3R:5622165..5629945	chr3R:5624109:-	DGRP589
	chrX:11633054..11641992	chrX:11633128:+	DGRP887
	chr2R:1222009..1227022	chr2R:1224914:+	DGRP256
	chr2R:1222009..1227022	chr2R:1225152:+	DGRP321
	chr2R:2908015..2916027	chr2R:2914149:+	DGRP843;DGRP738
	chr2R:9551096..9556747	chr2R:9552434:+	DGRP223
	chr2R:9551096..9556747	chr2R:9553471:-	DGRP38
	chr3L:19860036..19870006	chr3L:19861472:+	DGRP227
	chr3L:19860036..19870006	chr3L:19861443:-	DGRP911
	chr3L:26568011..26583993	chr3L:26568866:+	DGRP397
	chr3L:26568011..26583993	chr3L:26570798:+	DGRP535
	chrX:21702000..21849022	chrX:21778723:+	DGRP853;DGRP897
	chr2L:20302169..20312392	chr2L:20311069:-	DGRP321
	chr2L:20302169..20312392	chr2L:20311215:+	DGRP49
	chr2L:20302169..20312392	chr2L:20311155:-	DGRP502
	chr2R:20580257..20588994	chr2R:20582751:-	DGRP181
	chr2R:20580257..20588994	chr2R:20584450:+	DGRP303
	chr2R:20580257..20588994	chr2R:20582178:+	DGRP843
	chr3R:27139510..27148028	chr3R:27140388:-	DGRP317;DGRP318;DGRP378
	chrX:21630016..21690027	chrX:21631857:+	DGRP320
	chrX:21630016..21690027	chrX:21631570:+	DGRP359
	chrX:21630016..21690027	chrX:21634312:-	DGRP716
	chrX:21630016..21690027	chrX:21631582:-	DGRP721
	chr3R:4030003..4051002	chr3R:4038461:-	DGRP73
	chr3R:4030003..4051002	chr3R:4040122:+	DGRP843
	chr3R:4030003..4051002	chr3R:4040305:-	DGRP505;DGRP40;DGRP805
	chr2L:19565043..19574879	chr2L:19572042:+	DGRP223
	chr2L:19565043..19574879	chr2L:19572728:+	DGRP307
	chr2L:19565043..19574879	chr2L:19572635:-	DGRP391
	chr2L:19565043..19574879	chr2L:19572772:-	DGRP91
	chr2L:19565043..19574879	chr2L:19571975:-	DGRP233;DGRP338;DGRP584
	chr3R:29213303..29222023	chr3R:29214451:-	DGRP181
	chr3R:29213303..29222023	chr3R:29213829:+	DGRP223
	chr3R:29213303..29222023	chr3R:29213796:+	DGRP382
	chr3R:29213303..29222023	chr3R:29215838:+	DGRP57
	chr3R:29213303..29222023	chr3R:29217649:+	DGRP227;DGRP91
	chr3R:29213303..29222023	chr3R:29214480:-	DGRP426;DGRP892
	chr2R:6254004..6496026	chr2R:6482550:-	DGRP223
	chr2R:6254004..6496026	chr2R:6436042:-	DGRP32
	chr2R:6254004..6496026	chr2R:6482695:+	DGRP375
	chr2R:6254004..6496026	chr2R:6258918:+	DGRP535
	chr2R:6254004..6496026	chr2R:6267506:+	DGRP73
	chr2R:6254004..6496026	chr2R:6470389:-	DGRP303;DGRP306
	chr2R:6254004..6496026	chr2R:6494391:+	DGRP129;DGRP554;DGRP555
	chr2L:20101023..20120957	chr2L:20104738:-	DGRP149
	chr2L:20101023..20120957	chr2L:20118276:-	DGRP21
	chr2L:20101023..20120957	chr2L:20104910:-	DGRP596
	chr2L:20101023..20120957	chr2L:20117418:-	DGRP208;DGRP223
	chr2L:20101023..20120957	chr2L:20118296:-	DGRP304;DGRP310
	chr2L:20101023..20120957	chr2L:20104765:-	DGRP315;DGRP406;DGRP505;DGRP796;DGRP93
	chr2R:16827006..16835930	chr2R:16828873:-	DGRP217
	chr2R:16827006..16835930	chr2R:16828688:+	DGRP223
	chr2R:16827006..16835930	chr2R:16829085:-	DGRP233
	chr2R:16827006..16835930	chr2R:16829080:+	DGRP256
	chr2R:16827006..16835930	chr2R:16829080:-	DGRP303
	chr2R:16827006..16835930	chr2R:16828952:-	DGRP378
	chr2R:16827006..16835930	chr2R:16829042:+	DGRP509
	chr2R:16827006..16835930	chr2R:16828934:+	DGRP894
	chr2R:16827006..16835930	chr2R:16828726:+	DGRP177;DGRP324
	chr2R:16827006..16835930	chr2R:16830434:-	DGRP390;DGRP57
	chr2L:20144033..20224857	chr2L:20222906:-	DGRP227
	chr2L:20144033..20224857	chr2L:20209281:-	DGRP307
	chr2L:20144033..20224857	chr2L:20148601:-	DGRP317
	chr2L:20144033..20224857	chr2L:20222906:+	DGRP405
	chr2L:20144033..20224857	chr2L:20148620:+	DGRP409
	chr2L:20144033..20224857	chr2L:20222761:+	DGRP426
	chr2L:20144033..20224857	chr2L:20223091:+	DGRP461
	chr2L:20144033..20224857	chr2L:20176715:+	DGRP59
	chr2L:20144033..20224857	chr2L:20176731:-	DGRP69
	chr2L:20144033..20224857	chr2L:20172415:-	DGRP721
	chr2L:20144033..20224857	chr2L:20175902:-	DGRP808
	chr2L:20144033..20224857	chr2L:20222933:+	DGRP849
	chr2L:20144033..20224857	chr2L:20169174:-	DGRP853
	chr2L:20144033..20224857	chr2L:20201175:+	DGRP802;DGRP810;DGRP882

## Sheet: Sheet2
chr2L:4453162..4461990	chr2L:4460937:+	DGRP426
chr2L:5237044..5244973	chr2L:5237460:+	DGRP301
chr2R:12166005..12174999	chr2R:12174366:-	DGRP406
chr2R:20602012..20610602	chr2R:20602858:-	DGRP799
chr2R:25249234..25286929	chr2R:25257571:-	DGRP595
chr2R:2908015..2916027	chr2R:2914149:+	DGRP843
chr3L:1393074..1405607	chr3L:1401752:-	DGRP716
chr3L:22616249..22626483	chr3L:22617080:-	DGRP911
chr3L:23549084..23554933	chr3L:23554883:-	DGRP884
chr3L:24659002..24673020	chr3L:24669523:+	DGRP367
chr3L:26021009..26031023	chr3L:26023661:+	DGRP492
chr3L:638015..646696	chr3L:640308:-	DGRP796
chrX:11633054..11641992	chrX:11633128:+	DGRP887
chrX:21702000..21849022	chrX:21778723:+	DGRP853
chrX_DS485592v1_random:1..1102	chrX_DS485592v1_random:531:+	DGRP189
chr2R:1222009..1227022	chr2R:1224914:+	DGRP256
chr2R:1222009..1227022	chr2R:1225152:+	DGRP321
chr3L:19860036..19870006	chr3L:19861472:+	DGRP227
chr3L:19860036..19870006	chr3L:19861443:-	DGRP911
chr3L:26568011..26583993	chr3L:26568866:+	DGRP397
chr3L:26568011..26583993	chr3L:26570798:+	DGRP535
chr3R:12477001..12491022	chr3R:12477584:-	DGRP340
chr3R:12477001..12491022	chr3R:12477585:+	DGRP393
chr3R:15413010..15421962	chr3R:15420409:-	DGRP375
chr3R:15413010..15421962	chr3R:15420734:-	DGRP887
chr3R:5622165..5629945	chr3R:5624109:-	DGRP589
chr3R:5622165..5629945	chr3R:5624108:-	DGRP589
chr3R:27139510..27148028	chr3R:27140388:-	DGRP317;DGRP318;DGRP378
chr3R:4030003..4051002	chr3R:4040305:-	DGRP505
chr3R:4030003..4051002	chr3R:4038461:-	DGRP73
chr3R:4030003..4051002	chr3R:4040122:+	DGRP843
chr2L:20302169..20312392	chr2L:20311069:-	DGRP321
chr2L:20302169..20312392	chr2L:20311215:+	DGRP49
chr2L:20302169..20312392	chr2L:20311154:-	DGRP502
chr2L:20302169..20312392	chr2L:20311155:-	DGRP502
chr2R:20580257..20588994	chr2R:20582751:-	DGRP181
chr2R:20580257..20588994	chr2R:20584450:+	DGRP303
chr2R:20580257..20588994	chr2R:20588126:-	DGRP377
chr2R:20580257..20588994	chr2R:20582178:+	DGRP843
chr2R:9551096..9556747	chr2R:9553349:-	DGRP101
chr2R:9551096..9556747	chr2R:9552434:+	DGRP223
chr2R:9551096..9556747	chr2R:9552671:-	DGRP233
chr2R:9551096..9556747	chr2R:9553545:-	DGRP370
chr2R:9551096..9556747	chr2R:9553471:-	DGRP38
chrX:21630016..21690027	chrX:21631858:+	DGRP320
chrX:21630016..21690027	chrX:21631857:+	DGRP320
chrX:21630016..21690027	chrX:21631570:+	DGRP359
chrX:21630016..21690027	chrX:21634312:-	DGRP716
chrX:21630016..21690027	chrX:21631582:-	DGRP721
chr2L:19565043..19574879	chr2L:19572042:+	DGRP223
chr2L:19565043..19574879	chr2L:19572728:+	DGRP307
chr2L:19565043..19574879	chr2L:19572635:-	DGRP391
chr2L:19565043..19574879	chr2L:19572772:-	DGRP91
chr2L:19565043..19574879	chr2L:19571975:-	DGRP233;DGRP338;DGRP584
chr3R:29213303..29222023	chr3R:29214451:-	DGRP181
chr3R:29213303..29222023	chr3R:29213829:+	DGRP223
chr3R:29213303..29222023	chr3R:29213796:+	DGRP382
chr3R:29213303..29222023	chr3R:29214529:-	DGRP426
chr3R:29213303..29222023	chr3R:29215838:+	DGRP57
chr3R:29213303..29222023	chr3R:29217649:+	DGRP227;DGRP91
chr3R:29213303..29222023	chr3R:29214480:-	DGRP426;DGRP892
chr2R:6254004..6496026	chr2R:6482550:-	DGRP223
chr2R:6254004..6496026	chr2R:6436042:-	DGRP32
chr2R:6254004..6496026	chr2R:6482695:+	DGRP375
chr2R:6254004..6496026	chr2R:6482537:+	DGRP378
chr2R:6254004..6496026	chr2R:6258918:+	DGRP535
chr2R:6254004..6496026	chr2R:6494390:+	DGRP554
chr2R:6254004..6496026	chr2R:6494391:+	DGRP555
chr2R:6254004..6496026	chr2R:6267506:+	DGRP73
chr2R:6254004..6496026	chr2R:6470389:-	DGRP303;DGRP306
chr2R:16827006..16835930	chr2R:16828726:+	DGRP177
chr2R:16827006..16835930	chr2R:16829085:-	DGRP233
chr2R:16827006..16835930	chr2R:16829080:+	DGRP256
chr2R:16827006..16835930	chr2R:16829080:-	DGRP303
chr2R:16827006..16835930	chr2R:16828952:-	DGRP378
chr2R:16827006..16835930	chr2R:16829075:-	DGRP426
chr2R:16827006..16835930	chr2R:16829042:+	DGRP509
chr2R:16827006..16835930	chr2R:16830434:-	DGRP57
chr2R:16827006..16835930	chr2R:16830433:-	DGRP57
chr2R:16827006..16835930	chr2R:16828934:+	DGRP894
chr2R:16827006..16835930	chr2R:16830408:+	DGRP913
chr2L:20101023..20120957	chr2L:20104738:-	DGRP149
chr2L:20101023..20120957	chr2L:20118276:-	DGRP21
chr2L:20101023..20120957	chr2L:20117844:-	DGRP377
chr2L:20101023..20120957	chr2L:20104910:-	DGRP596
chr2L:20101023..20120957	chr2L:20118057:-	DGRP88
chr2L:20101023..20120957	chr2L:20117418:-	DGRP208;DGRP223
chr2L:20101023..20120957	chr2L:20118296:-	DGRP304;DGRP310
chr2L:20101023..20120957	chr2L:20104765:-	DGRP315;DGRP406;DGRP505;DGRP796;DGRP93
chr2L:20144033..20224857	chr2L:20175023:-	DGRP227
chr2L:20144033..20224857	chr2L:20222906:-	DGRP227
chr2L:20144033..20224857	chr2L:20148601:-	DGRP317
chr2L:20144033..20224857	chr2L:20222906:+	DGRP405
chr2L:20144033..20224857	chr2L:20148620:+	DGRP409
chr2L:20144033..20224857	chr2L:20223091:+	DGRP461
chr2L:20144033..20224857	chr2L:20148620:-	DGRP528
chr2L:20144033..20224857	chr2L:20176731:-	DGRP69
chr2L:20144033..20224857	chr2L:20172415:-	DGRP721
chr2L:20144033..20224857	chr2L:20205072:+	DGRP732
chr2L:20144033..20224857	chr2L:20175902:-	DGRP808
chr2L:20144033..20224857	chr2L:20222933:+	DGRP849
chr2L:20144033..20224857	chr2L:20169174:-	DGRP853
chr2L:20144033..20224857	chr2L:20201175:+	DGRP802;DGRP810;DGRP882
