# Supplementary material for: Rapid evolution of piRNA-mediated silencing of an invading transposable element was driven by abundant de novo mutations
Source: HighWire-hosted journal article supplement (doi:10.1101/gr.251546.119), 2020-04-01
Supplement: Supplemental_Table_S8.xlsx [file Supplemental_Table_S8.xlsx]

## Sheet: Sheet1
Table S8. non-TAS P-element insertions found in all DGRP genomes. Breakpoints are in dm6 coordinate.
chromosome	breakpoint	strand	frequency
chr2L	114687	-	DGRP26:1.000
chr2L	129509	-	DGRP229:1.000
chr2L	131925	+	DGRP535:0.867
chr2L	131993	+	DGRP301:0.873
chr2L	220699	-	DGRP492:1.000
chr2L	222176	+	DGRP531:1.000
chr2L	222188	+	DGRP272:1.000
chr2L	222300	+	DGRP233:1.000
chr2L	222300	-	DGRP233:1.000
chr2L	222384	+	DGRP748:1.000
chr2L	222439	+	DGRP591:1.000;DGRP776:1.000;DGRP859:1.000
chr2L	222512	-	DGRP787:1.000
chr2L	245763	+	DGRP908:1.000
chr2L	249365	+	DGRP317:1.000;DGRP73:0.982;DGRP83:1.000
chr2L	249454	+	DGRP748:1.000
chr2L	267524	+	DGRP256:1.000;DGRP393:1.000;DGRP757:1.000
chr2L	267524	-	DGRP727:1.000;DGRP765:1.000
chr2L	285718	+	DGRP195:1.000
chr2L	285741	-	DGRP352:0.846
chr2L	285784	+	DGRP352:0.889
chr2L	310180	+	DGRP189:1.000
chr2L	310252	+	DGRP531:1.000
chr2L	332187	-	DGRP737:1.000;DGRP907:1.000
chr2L	419843	+	DGRP397:1.000
chr2L	431102	+	DGRP887:1.000
chr2L	431103	-	DGRP303:0.374;DGRP306:1.000
chr2L	431831	+	DGRP505:1.000;DGRP551:0.980
chr2L	432020	-	DGRP340:1.000
chr2L	447767	+	DGRP223:1.000
chr2L	455871	+	DGRP748:1.000;DGRP894:1.000
chr2L	467726	+	DGRP385:1.000;DGRP395:1.000;DGRP399:1.000
chr2L	478905	+	DGRP149:1.000
chr2L	478905	-	DGRP149:1.000
chr2L	479696	-	DGRP566:0.893
chr2L	479843	+	DGRP321:1.000;DGRP391:1.000
chr2L	479863	+	DGRP227:1.000
chr2L	490706	+	DGRP381:0.894;DGRP849:0.524
chr2L	490793	-	DGRP890:1.000
chr2L	588041	+	DGRP272:1.000
chr2L	594857	+	DGRP303:0.425;DGRP306:1.000
chr2L	826536	-	DGRP589:1.000
chr2L	837860	+	DGRP233:0.929
chr2L	852849	-	DGRP748:1.000;DGRP894:1.000
chr2L	870488	-	DGRP105:1.000
chr2L	1119142	+	DGRP360:0.973
chr2L	1119743	-	DGRP383:1.000;DGRP398:1.000
chr2L	1185905	-	DGRP383:1.000;DGRP398:1.000
chr2L	1646956	+	DGRP596:1.000
chr2L	1650001	+	DGRP317:1.000
chr2L	1651263	+	DGRP309:1.000
chr2L	1657363	+	DGRP390:0.673;DGRP774:1.000
chr2L	1724350	+	DGRP301:0.712;DGRP426:0.875
chr2L	1737413	+	DGRP890:1.000
chr2L	1737432	+	DGRP738:1.000
chr2L	1737432	-	DGRP392:1.000
chr2L	1884672	-	DGRP491:1.000
chr2L	1988289	+	DGRP272:1.000;DGRP287:1.000
chr2L	2011550	-	DGRP239:1.000
chr2L	2045502	-	DGRP336:0.812
chr2L	2109936	+	DGRP882:1.000
chr2L	2174983	+	DGRP390:1.000
chr2L	2175354	+	DGRP370:1.000
chr2L	2178797	+	DGRP646:0.889
chr2L	2178960	+	DGRP233:1.000
chr2L	2202823	+	DGRP393:1.000
chr2L	2202950	-	DGRP563:0.836
chr2L	2214189	+	DGRP256:1.000
chr2L	2242271	+	DGRP320:1.000
chr2L	2242271	-	DGRP882:1.000
chr2L	2357401	+	DGRP589:1.000
chr2L	2492944	-	DGRP721:1.000
chr2L	2494102	-	DGRP900:1.000;DGRP887:1.000
chr2L	2494106	-	DGRP850:1.000;DGRP853:1.000
chr2L	2494207	-	DGRP443:0.900
chr2L	2677654	-	DGRP439:1.000
chr2L	2677685	+	DGRP21:1.000;DGRP239:0.533
chr2L	2753099	+	DGRP377:0.955
chr2L	2753132	-	DGRP239:1.000
chr2L	2754578	-	DGRP748:1.000
chr2L	2755340	-	DGRP738:1.000
chr2L	2755373	-	DGRP627:1.000
chr2L	2755391	+	DGRP897:1.000
chr2L	2808033	-	DGRP380:1.000;DGRP83:1.000
chr2L	2808100	+	DGRP380:1.000
chr2L	2808167	+	DGRP228:1.000;DGRP320:1.000
chr2L	2808247	+	DGRP461:1.000
chr2L	2855326	-	DGRP301:0.920
chr2L	2857203	+	DGRP491:1.000;DGRP738:0.592
chr2L	2862547	+	DGRP857:1.000
chr2L	2885207	-	DGRP737:1.000;DGRP907:1.000
chr2L	2972445	-	DGRP714:1.000
chr2L	2987508	+	DGRP390:1.000
chr2L	2999261	+	DGRP317:1.000;DGRP443:0.621
chr2L	3018390	+	DGRP75:1.000;DGRP377:0.946
chr2L	3018416	+	DGRP528:0.950
chr2L	3046625	+	DGRP57:1.000
chr2L	3059262	+	DGRP761:1.000
chr2L	3144812	-	DGRP405:0.692;DGRP584:0.985;DGRP93:1.000
chr2L	3152597	+	DGRP837:1.000
chr2L	3158893	+	DGRP441:1.000;DGRP861:1.000
chr2L	3354845	+	DGRP223:0.981
chr2L	3354866	+	DGRP177:1.000
chr2L	3355331	-	DGRP303:0.437;DGRP306:0.991
chr2L	3428551	+	DGRP714:0.913
chr2L	3478175	+	DGRP101:0.571;DGRP584:1.000;DGRP93:1.000
chr2L	3478307	+	DGRP528:0.829
chr2L	3478331	+	DGRP513:1.000;DGRP554:1.000;DGRP555:1.000;DGRP566:0.283
chr2L	3478331	-	DGRP426:0.909
chr2L	3478436	-	DGRP374:1.000
chr2L	3491150	+	DGRP332:1.000
chr2L	3619245	-	DGRP83:1.000
chr2L	3630017	+	DGRP383:1.000;DGRP398:1.000
chr2L	3631902	-	DGRP559:0.979;DGRP804:1.000;DGRP887:1.000
chr2L	3631940	-	DGRP336:0.700;DGRP338:0.714
chr2L	3632190	+	DGRP352:0.944;DGRP49:0.979;DGRP630:1.000;DGRP853:1.000;DGRP85:0.824
chr2L	3632190	-	DGRP195:1.000;DGRP370:1.000;DGRP371:1.000;DGRP40:1.000;DGRP843:1.000
chr2L	3632198	-	DGRP233:1.000
chr2L	3632250	+	DGRP233:1.000
chr2L	3632292	-	DGRP502:0.520;DGRP559:1.000;DGRP804:1.000;DGRP887:1.000
chr2L	3656014	+	DGRP393:1.000
chr2L	3657623	-	DGRP535:1.000
chr2L	3771702	-	DGRP563:0.848;DGRP890:1.000
chr2L	3771703	+	DGRP783:1.000
chr2L	3803807	-	DGRP897:1.000
chr2L	3806071	-	DGRP900:1.000
chr2L	3896268	-	DGRP437:0.966
chr2L	3935091	-	DGRP100:0.963
chr2L	4249631	-	DGRP908:0.973
chr2L	4394130	+	DGRP443:0.833
chr2L	4460937	+	DGRP426:0.818
chr2L	4463471	+	DGRP892:1.000
chr2L	4700793	+	DGRP272:0.700;DGRP287:1.000;DGRP45:1.000;DGRP509:0.889
chr2L	4821356	-	DGRP832:1.000
chr2L	4838344	+	DGRP911:1.000
chr2L	4852843	-	DGRP362:0.951
chr2L	4861688	-	DGRP303:0.611;DGRP306:0.993
chr2L	4892100	-	DGRP301:0.986
chr2L	4892112	+	DGRP843:1.000;DGRP879:1.000
chr2L	4892293	+	DGRP223:0.882;DGRP85:0.310
chr2L	4906785	+	DGRP441:1.000
chr2L	5000845	+	DGRP405:0.643;DGRP443:0.750
chr2L	5027480	+	DGRP361:1.000;DGRP397:1.000
chr2L	5027517	-	DGRP502:0.909
chr2L	5027683	-	DGRP303:0.888;DGRP304:1.000
chr2L	5029509	-	DGRP892:1.000
chr2L	5029534	-	DGRP857:1.000
chr2L	5029602	+	DGRP336:0.810
chr2L	5052513	+	DGRP589:1.000;DGRP790:1.000
chr2L	5064190	+	DGRP370:1.000
chr2L	5093269	+	DGRP189:1.000
chr2L	5108283	+	DGRP280:1.000
chr2L	5108437	-	DGRP227:1.000
chr2L	5108448	+	DGRP129:1.000
chr2L	5108498	+	DGRP177:1.000
chr2L	5461475	+	DGRP805:1.000
chr2L	5461563	-	DGRP377:1.000
chr2L	5480380	-	DGRP280:1.000;DGRP374:1.000
chr2L	5542985	+	DGRP882:0.905
chr2L	5546455	-	DGRP843:1.000
chr2L	5658629	+	DGRP443:0.909
chr2L	5678534	+	DGRP136:1.000
chr2L	5800196	+	DGRP109:0.867;DGRP324:1.000
chr2L	5800196	-	DGRP272:0.909;DGRP85:0.696
chr2L	5823993	-	DGRP502:0.923
chr2L	5907456	+	DGRP508:1.000
chr2L	5907456	-	DGRP370:1.000
chr2L	5943859	+	DGRP440:1.000;DGRP101:0.667
chr2L	5943962	-	DGRP42:1.000
chr2L	5943984	-	DGRP233:1.000
chr2L	5944657	-	DGRP371:1.000
chr2L	5944688	+	DGRP83:0.948
chr2L	5971662	-	DGRP88:0.839
chr2L	5980479	+	DGRP336:0.800
chr2L	5998301	-	DGRP73:1.000
chr2L	6010743	-	DGRP233:1.000
chr2L	6069141	-	DGRP861:1.000
chr2L	6071093	+	DGRP42:1.000;DGRP783:1.000;DGRP83:1.000
chr2L	6082552	+	DGRP596:1.000
chr2L	6083259	-	DGRP738:1.000
chr2L	6100308	+	DGRP380:0.981
chr2L	6100752	+	DGRP371:1.000
chr2L	6118476	-	DGRP509:1.000
chr2L	6125142	+	DGRP596:1.000;DGRP900:1.000
chr2L	6133430	+	DGRP721:1.000
chr2L	6135268	-	DGRP397:1.000
chr2L	6178793	+	DGRP340:1.000
chr2L	6179107	+	DGRP69:1.000
chr2L	6252970	+	DGRP642:1.000
chr2L	6319199	+	DGRP531:1.000
chr2L	6339570	+	DGRP796:1.000
chr2L	6411176	+	DGRP352:1.000
chr2L	6411287	+	DGRP223:1.000
chr2L	6411333	+	DGRP217:1.000
chr2L	6411364	+	DGRP804:1.000
chr2L	6455214	+	DGRP227:1.000
chr2L	6455217	+	DGRP362:1.000
chr2L	6455879	+	DGRP228:1.000
chr2L	6465712	+	DGRP397:1.000
chr2L	6465772	+	DGRP397:1.000
chr2L	6479459	+	DGRP109:0.889
chr2L	6494642	+	DGRP309:1.000;DGRP340:1.000
chr2L	6702387	-	DGRP787:1.000
chr2L	6709160	-	DGRP26:1.000
chr2L	6799814	-	DGRP390:1.000
chr2L	6800872	-	DGRP233:1.000
chr2L	6874343	+	DGRP361:1.000
chr2L	6874414	+	DGRP361:1.000;DGRP502:0.625;DGRP837:1.000
chr2L	6874414	-	DGRP371:1.000
chr2L	7010105	-	DGRP73:1.000
chr2L	7010176	-	DGRP49:1.000
chr2L	7010488	+	DGRP158:1.000
chr2L	7013355	+	DGRP88:0.882
chr2L	7038672	-	DGRP837:1.000
chr2L	7042258	+	DGRP303:0.854
chr2L	7043906	-	DGRP884:1.000
chr2L	7043954	-	DGRP884:1.000
chr2L	7049269	+	DGRP551:1.000
chr2L	7056325	-	DGRP634:1.000;DGRP774:1.000
chr2L	7202467	-	DGRP85:0.815
chr2L	7203881	+	DGRP804:1.000;DGRP849:0.575
chr2L	7204193	-	DGRP397:0.611;DGRP85:0.625
chr2L	7249514	+	DGRP26:1.000
chr2L	7249556	-	DGRP373:1.000
chr2L	7249687	-	DGRP804:1.000;DGRP849:0.767
chr2L	7277178	-	DGRP45:1.000;DGRP73:1.000
chr2L	7307075	+	DGRP57:1.000
chr2L	7422648	-	DGRP149:1.000
chr2L	7423922	-	DGRP85:1.000
chr2L	7424090	-	DGRP509:1.000
chr2L	7437423	-	DGRP732:1.000;DGRP737:1.000;DGRP907:1.000
chr2L	7437425	-	DGRP42:1.000
chr2L	7437451	-	DGRP321:1.000
chr2L	7530589	+	DGRP491:1.000
chr2L	7533976	-	DGRP892:0.909
chr2L	7573697	-	DGRP338:0.607;DGRP492:1.000
chr2L	7575658	+	DGRP391:1.000
chr2L	7576637	+	DGRP208:1.000;DGRP227:1.000;DGRP336:0.640;DGRP348:1.000;DGRP350:1.000;DGRP356:1.000;DGRP358:1.000;DGRP380:0.979;DGRP49:0.486;DGRP566:0.328;DGRP591:1.000;DGRP69:1.000;DGRP748:1.000;DGRP776:1.000;DGRP810:1.000;DGRP820:1.000;DGRP837:0.857;DGRP85:0.800
chr2L	7576637	-	DGRP101:0.783;DGRP223:1.000;DGRP355:1.000;DGRP596:0.508;DGRP879:1.000
chr2L	7701721	+	DGRP748:1.000;DGRP714:0.600
chr2L	7854895	-	DGRP45:1.000;DGRP73:1.000
chr2L	7855320	+	DGRP181:1.000
chr2L	7855411	+	DGRP26:1.000
chr2L	7855495	-	DGRP26:1.000
chr2L	7882263	+	DGRP315:1.000
chr2L	7888496	+	DGRP352:0.686;DGRP642:1.000
chr2L	7991664	-	DGRP26:1.000
chr2L	7991761	+	DGRP136:1.000;DGRP149:1.000;DGRP513:1.000;DGRP714:0.880
chr2L	7991766	+	DGRP233:1.000
chr2L	7993161	+	DGRP75:1.000
chr2L	7993768	+	DGRP819:1.000
chr2L	7994240	-	DGRP502:0.815
chr2L	8071676	-	DGRP374:1.000
chr2L	8088194	-	DGRP818:1.000
chr2L	8104400	-	DGRP227:1.000
chr2L	8127702	-	DGRP508:1.000
chr2L	8159605	-	DGRP319:1.000
chr2L	8159818	-	DGRP362:1.000
chr2L	8162435	-	DGRP31:1.000;DGRP40:1.000
chr2L	8163064	-	DGRP217:1.000
chr2L	8205166	-	DGRP109:0.742;DGRP563:0.932;DGRP890:1.000
chr2L	8205171	-	DGRP508:1.000
chr2L	8205178	-	DGRP381:1.000
chr2L	8277727	+	DGRP461:1.000
chr2L	8277741	-	DGRP233:1.000
chr2L	8277775	-	DGRP703:1.000
chr2L	8300785	+	DGRP307:1.000
chr2L	8362522	-	DGRP59:1.000
chr2L	8382809	-	DGRP380:0.987
chr2L	8419818	+	DGRP595:1.000
chr2L	8419853	-	DGRP861:1.000
chr2L	8433636	-	DGRP348:1.000;DGRP358:1.000
chr2L	8463984	+	DGRP303:0.342;DGRP306:1.000
chr2L	8464081	+	DGRP321:1.000
chr2L	8528533	-	DGRP208:1.000;DGRP380:1.000
chr2L	8535193	+	DGRP38:1.000
chr2L	8542618	-	DGRP714:0.857
chr2L	8673152	+	DGRP732:1.000
chr2L	8699433	+	DGRP83:1.000
chr2L	8699803	+	DGRP627:1.000
chr2L	8700038	-	DGRP373:1.000
chr2L	8718022	+	DGRP821:0.994
chr2L	8874826	-	DGRP136:1.000
chr2L	8951631	-	DGRP492:1.000
chr2L	8951650	-	DGRP88:0.889
chr2L	8989213	-	DGRP73:1.000
chr2L	9019609	+	DGRP361:1.000;DGRP563:0.492
chr2L	9125738	-	DGRP737:1.000;DGRP73:1.000;DGRP884:1.000
chr2L	9152708	+	DGRP892:1.000
chr2L	9176207	-	DGRP223:1.000
chr2L	9176231	-	DGRP810:1.000
chr2L	9176320	+	DGRP535:1.000;DGRP783:0.739
chr2L	9237651	-	DGRP822:1.000;DGRP832:1.000
chr2L	9237842	+	DGRP256:1.000
chr2L	9387606	+	DGRP390:1.000
chr2L	9387606	-	DGRP737:1.000;DGRP907:1.000
chr2L	9437455	+	DGRP129:1.000
chr2L	9437455	-	DGRP319:1.000
chr2L	9437481	-	DGRP395:1.000;DGRP399:1.000;DGRP42:1.000;DGRP855:1.000
chr2L	9437509	-	DGRP378:1.000
chr2L	9496644	-	DGRP884:1.000
chr2L	9521636	-	DGRP356:1.000
chr2L	9521720	-	DGRP45:1.000
chr2L	9523044	+	DGRP309:1.000;DGRP392:1.000
chr2L	9616801	-	DGRP367:1.000
chr2L	9699318	+	DGRP227:1.000
chr2L	9699749	+	DGRP320:1.000
chr2L	9782283	+	DGRP374:1.000
chr2L	9782351	-	DGRP223:1.000
chr2L	9782375	+	DGRP461:1.000
chr2L	9782375	-	DGRP554:1.000;DGRP555:1.000;DGRP804:0.913;DGRP849:0.897
chr2L	9782415	-	DGRP776:1.000
chr2L	9790716	-	DGRP884:1.000
chr2L	9908661	+	DGRP318:1.000;DGRP378:1.000
chr2L	9908724	-	DGRP318:1.000
chr2L	9938816	+	DGRP513:1.000
chr2L	9984577	-	DGRP821:1.000
chr2L	9984626	-	DGRP820:1.000
chr2L	9984632	+	DGRP559:1.000;DGRP900:1.000
chr2L	10003757	-	DGRP93:1.000
chr2L	10292479	-	DGRP310:1.000
chr2L	10335038	+	DGRP177:1.000
chr2L	10335052	-	DGRP324:1.000;DGRP439:1.000;DGRP85:0.727
chr2L	10335281	-	DGRP321:1.000
chr2L	10339445	+	DGRP348:1.000;DGRP350:1.000;DGRP358:1.000
chr2L	10396922	-	DGRP239:0.867
chr2L	10405035	-	DGRP857:1.000
chr2L	10431395	+	DGRP318:0.909
chr2L	10469555	-	DGRP40:1.000
chr2L	10474371	-	DGRP73:1.000
chr2L	10488634	-	DGRP843:1.000
chr2L	10744408	+	DGRP405:0.875
chr2L	10757245	+	DGRP589:1.000;DGRP790:1.000
chr2L	10849564	+	DGRP738:0.941
chr2L	10850423	+	DGRP105:1.000
chr2L	10856624	+	DGRP75:1.000
chr2L	11045335	+	DGRP409:1.000
chr2L	11057496	-	DGRP59:1.000
chr2L	11065916	+	DGRP332:1.000
chr2L	11168917	-	DGRP324:1.000
chr2L	11221398	+	DGRP716:1.000;DGRP850:1.000;DGRP859:1.000;DGRP317:1.000
chr2L	11320827	+	DGRP393:1.000
chr2L	11445937	-	DGRP596:0.944
chr2L	11447867	+	DGRP843:1.000
chr2L	11447948	+	DGRP761:0.967
chr2L	11649273	+	DGRP280:1.000
chr2L	11807133	+	DGRP256:1.000
chr2L	11807323	+	DGRP69:1.000
chr2L	11807432	-	DGRP272:1.000;DGRP287:1.000
chr2L	11808203	-	DGRP105:1.000
chr2L	12007280	-	DGRP360:1.000
chr2L	12011162	+	DGRP857:1.000
chr2L	12026470	+	DGRP362:1.000
chr2L	12027932	+	DGRP591:1.000
chr2L	12038590	-	DGRP233:1.000
chr2L	12045249	+	DGRP381:0.655;DGRP712:1.000;DGRP819:1.000;DGRP913:0.784
chr2L	12046132	+	DGRP129:1.000
chr2L	12046475	-	DGRP149:1.000
chr2L	12046968	+	DGRP45:1.000
chr2L	12096524	+	DGRP233:1.000
chr2L	12134677	+	DGRP227:1.000
chr2L	12174974	+	DGRP517:1.000
chr2L	12207752	-	DGRP303:0.934
chr2L	12433145	+	DGRP138:0.993
chr2L	12473328	+	DGRP332:1.000
chr2L	12483067	+	DGRP229:0.993
chr2L	12484398	+	DGRP161:1.000
chr2L	12484431	-	DGRP158:0.833;DGRP161:1.000;DGRP338:0.622;DGRP85:0.542
chr2L	12505289	-	DGRP340:1.000
chr2L	12507741	-	DGRP217:1.000;DGRP310:1.000
chr2L	12507796	-	DGRP359:1.000
chr2L	12507812	-	DGRP85:0.872
chr2L	12507829	-	DGRP101:0.526;DGRP352:0.846;DGRP492:1.000
chr2L	12507953	-	DGRP737:1.000
chr2L	12521275	+	DGRP227:1.000
chr2L	12543390	+	DGRP517:1.000
chr2L	12678470	-	DGRP390:0.960
chr2L	12822166	+	DGRP502:0.844
chr2L	12822845	+	DGRP85:0.806
chr2L	12854736	+	DGRP324:1.000;DGRP757:1.000;DGRP808:1.000;DGRP256:1.000
chr2L	12854790	+	DGRP256:1.000
chr2L	13018660	+	DGRP897:1.000
chr2L	13060217	+	DGRP31:1.000
chr2L	13060499	-	DGRP426:0.857
chr2L	13244696	+	DGRP229:1.000;DGRP439:1.000;DGRP787:1.000
chr2L	13290646	-	DGRP634:1.000
chr2L	13399013	-	DGRP32:1.000
chr2L	13512787	-	DGRP850:0.887
chr2L	13512899	+	DGRP748:1.000
chr2L	13547818	-	DGRP857:1.000
chr2L	13547835	+	DGRP566:1.000
chr2L	13547842	+	DGRP566:1.000
chr2L	13548883	+	DGRP377:0.947
chr2L	13549355	-	DGRP324:1.000;DGRP348:1.000;DGRP350:1.000;DGRP358:1.000
chr2L	13550123	+	DGRP508:0.955
chr2L	13550127	-	DGRP208:1.000;DGRP57:1.000
chr2L	13550129	-	DGRP381:0.893
chr2L	13666099	+	DGRP887:1.000
chr2L	13717322	-	DGRP374:0.955
chr2L	13717348	-	DGRP591:1.000;DGRP801:1.000
chr2L	13717359	-	DGRP75:1.000;DGRP887:0.611
chr2L	13717364	+	DGRP227:1.000
chr2L	13780182	+	DGRP256:1.000;DGRP397:0.276
chr2L	13780182	-	DGRP256:1.000
chr2L	13878188	+	DGRP303:0.930
chr2L	14001282	-	DGRP505:1.000
chr2L	14020800	+	DGRP761:1.000;DGRP810:1.000
chr2L	14234689	-	DGRP233:0.600;DGRP397:0.588
chr2L	14263017	+	DGRP397:1.000
chr2L	14300969	+	DGRP304:1.000
chr2L	14300969	-	DGRP837:1.000
chr2L	14352141	+	DGRP83:1.000
chr2L	14490349	-	DGRP804:1.000
chr2L	14490464	-	DGRP821:1.000
chr2L	14490494	-	DGRP818:1.000
chr2L	14490577	+	DGRP894:1.000
chr2L	14490582	+	DGRP136:1.000;DGRP40:1.000
chr2L	14997588	-	DGRP239:0.861
chr2L	15038854	-	DGRP317:1.000
chr2L	15039469	+	DGRP381:0.694;DGRP630:1.000
chr2L	15039469	-	DGRP340:1.000;DGRP892:1.000
chr2L	15055637	-	DGRP301:0.859
chr2L	15055715	+	DGRP301:0.907
chr2L	15083488	-	DGRP348:1.000;DGRP350:1.000;DGRP358:1.000
chr2L	15200696	+	DGRP392:1.000;DGRP395:1.000;DGRP399:1.000;DGRP385:1.000
chr2L	15264699	-	DGRP732:1.000
chr2L	15264721	-	DGRP383:1.000;DGRP398:1.000;DGRP492:1.000
chr2L	15264826	+	DGRP21:1.000
chr2L	15332674	+	DGRP596:1.000
chr2L	15332695	+	DGRP505:1.000
chr2L	15332836	+	DGRP177:1.000;DGRP627:1.000;DGRP738:0.344
chr2L	15332836	-	DGRP136:1.000;DGRP761:1.000;DGRP810:1.000
chr2L	15333497	+	DGRP381:0.714;DGRP630:0.974
chr2L	15333503	+	DGRP491:1.000
chr2L	15333601	-	DGRP177:1.000;DGRP48:1.000
chr2L	15333605	+	DGRP721:1.000;DGRP83:1.000
chr2L	15333652	-	DGRP761:1.000;DGRP810:1.000
chr2L	15333759	-	DGRP513:1.000
chr2L	15333766	-	DGRP101:0.640;DGRP589:1.000;DGRP634:1.000;DGRP790:1.000;DGRP894:1.000
chr2L	15333805	-	DGRP235:1.000
chr2L	15337064	-	DGRP774:0.800
chr2L	15370890	+	DGRP69:1.000
chr2L	15415716	-	DGRP559:0.976
chr2L	15552708	-	DGRP42:1.000;DGRP804:1.000
chr2L	15751681	+	DGRP409:0.962
chr2L	15756981	-	DGRP799:1.000
chr2L	15762767	+	DGRP317:1.000;DGRP913:1.000
chr2L	15762767	-	DGRP129:1.000;DGRP233:0.964;DGRP338:0.765;DGRP528:0.870;DGRP584:1.000
chr2L	15762783	-	DGRP158:1.000;DGRP383:1.000;DGRP492:1.000;DGRP223:0.750;DGRP398:1.000
chr2L	15960208	+	DGRP802:0.787;DGRP882:1.000
chr2L	15960231	+	DGRP531:1.000
chr2L	16231487	+	DGRP21:1.000
chr2L	16251824	+	DGRP391:1.000
chr2L	16251833	+	DGRP370:1.000
chr2L	16257601	-	DGRP554:1.000;DGRP555:1.000;DGRP821:1.000
chr2L	16325973	-	DGRP75:1.000
chr2L	16326020	+	DGRP390:1.000
chr2L	16326045	+	DGRP321:1.000
chr2L	16326045	-	DGRP377:0.903;DGRP321:1.000
chr2L	16351845	+	DGRP805:1.000
chr2L	16351845	-	DGRP805:1.000
chr2L	16352366	+	DGRP59:1.000
chr2L	16353005	-	DGRP310:0.972
chr2L	16520284	-	DGRP530:1.000
chr2L	16520702	+	DGRP390:1.000
chr2L	16521305	-	DGRP21:1.000
chr2L	16532862	+	DGRP93:1.000
chr2L	16532979	-	DGRP239:1.000
chr2L	16532995	+	DGRP441:0.879
chr2L	16533015	+	DGRP861:1.000
chr2L	16533033	+	DGRP309:1.000
chr2L	16685230	-	DGRP887:1.000
chr2L	16685269	+	DGRP776:0.843;DGRP887:1.000
chr2L	16685269	-	DGRP360:0.975;DGRP907:1.000
chr2L	16690486	-	DGRP233:1.000
chr2L	16690514	-	DGRP796:1.000
chr2L	16690525	-	DGRP894:1.000
chr2L	16716504	-	DGRP820:1.000
chr2L	16727561	+	DGRP208:1.000
chr2L	16728968	-	DGRP820:1.000
chr2L	16858466	-	DGRP392:1.000;DGRP395:1.000;DGRP399:1.000
chr2L	16858618	-	DGRP810:1.000;DGRP395:1.000;DGRP399:1.000
chr2L	16972905	+	DGRP105:1.000
chr2L	16972905	-	DGRP105:1.000;DGRP336:1.000;DGRP843:1.000
chr2L	16972924	+	DGRP223:0.945
chr2L	17014682	+	DGRP381:0.778;DGRP630:1.000
chr2L	17384998	-	DGRP776:0.567;DGRP804:0.604
chr2L	17450460	+	DGRP716:1.000
chr2L	17450460	-	DGRP716:1.000
chr2L	17450475	+	DGRP441:0.852
chr2L	18125728	-	DGRP272:1.000;DGRP287:1.000
chr2L	18387756	+	DGRP336:0.500;DGRP338:0.684
chr2L	18617293	+	DGRP340:0.917
chr2L	18705688	+	DGRP843:1.000
chr2L	18733024	+	DGRP757:1.000
chr2L	18733062	-	DGRP849:0.851
chr2L	18742589	+	DGRP208:1.000;DGRP223:1.000;DGRP280:1.000
chr2L	18782995	-	DGRP336:0.600;DGRP338:0.464
chr2L	18796158	+	DGRP381:0.706;DGRP630:1.000
chr2L	18823532	+	DGRP382:1.000
chr2L	18823559	-	DGRP303:0.453;DGRP306:1.000;DGRP405:0.900;DGRP491:1.000;DGRP861:1.000
chr2L	18823563	-	DGRP563:0.786;DGRP853:0.444;DGRP859:1.000;DGRP890:1.000
chr2L	18823570	+	DGRP390:1.000
chr2L	18831236	+	DGRP491:1.000
chr2L	18845153	+	DGRP321:1.000
chr2L	18944504	-	DGRP105:1.000
chr2L	18987262	-	DGRP332:1.000
chr2L	18987316	+	DGRP324:1.000
chr2L	19134543	-	DGRP378:0.765;DGRP804:0.694
chr2L	19135309	-	DGRP324:1.000
chr2L	19135437	-	DGRP397:0.826
chr2L	19142361	-	DGRP382:1.000
chr2L	19158149	+	DGRP799:1.000
chr2L	19165268	+	DGRP48:1.000
chr2L	19363382	+	DGRP535:1.000
chr2L	19420192	-	DGRP802:0.726;DGRP810:1.000;DGRP882:1.000
chr2L	19423571	+	DGRP371:1.000
chr2L	19424016	-	DGRP397:1.000
chr2L	19464051	-	DGRP359:1.000
chr2L	19517617	+	DGRP832:1.000;DGRP900:1.000
chr2L	19526702	-	DGRP69:1.000
chr2L	19526721	-	DGRP757:1.000
chr2L	19546971	+	DGRP843:1.000
chr2L	19549661	-	DGRP332:1.000
chr2L	19571975	-	DGRP233:1.000;DGRP338:0.600;DGRP584:0.985
chr2L	19572042	+	DGRP223:1.000
chr2L	19572635	-	DGRP391:1.000
chr2L	19572728	+	DGRP307:1.000
chr2L	19572772	-	DGRP91:1.000
chr2L	19575075	+	DGRP235:1.000
chr2L	19580365	+	DGRP390:1.000
chr2L	19583960	-	DGRP195:1.000
chr2L	19606343	-	DGRP31:1.000;DGRP802:0.577;DGRP897:1.000
chr2L	19737486	-	DGRP783:1.000
chr2L	19791590	+	DGRP100:0.590;DGRP318:1.000;DGRP378:0.750;DGRP426:0.650
chr2L	19791919	+	DGRP392:0.917;DGRP395:0.882;DGRP822:1.000
chr2L	19811995	+	DGRP727:1.000
chr2L	19815218	-	DGRP397:1.000
chr2L	19917117	+	DGRP505:1.000
chr2L	20085126	+	DGRP233:1.000;DGRP887:0.619
chr2L	20085126	-	DGRP303:0.926;DGRP360:0.976;DGRP563:0.846;DGRP853:0.676;DGRP859:1.000;DGRP890:1.000;DGRP907:0.966
chr2L	20085155	-	DGRP566:1.000
chr2L	20085165	+	DGRP853:0.577;DGRP859:1.000
chr2L	20097806	+	DGRP59:1.000
chr2L	20104738	-	DGRP149:1.000
chr2L	20104765	-	DGRP315:1.000;DGRP406:1.000;DGRP505:1.000;DGRP796:0.591;DGRP93:1.000
chr2L	20104910	-	DGRP596:1.000
chr2L	20117418	-	DGRP208:1.000;DGRP223:1.000
chr2L	20118276	-	DGRP21:1.000
chr2L	20118296	-	DGRP304:1.000;DGRP310:1.000
chr2L	20148601	-	DGRP317:1.000
chr2L	20148620	+	DGRP409:0.972
chr2L	20169174	-	DGRP853:1.000
chr2L	20172415	-	DGRP721:1.000
chr2L	20175902	-	DGRP808:1.000
chr2L	20176715	+	DGRP59:1.000
chr2L	20176731	-	DGRP69:0.923
chr2L	20201175	+	DGRP802:0.784;DGRP810:1.000;DGRP882:1.000
chr2L	20209281	-	DGRP307:0.840
chr2L	20222761	+	DGRP426:0.857
chr2L	20222906	+	DGRP405:0.857
chr2L	20222906	-	DGRP227:1.000
chr2L	20222933	+	DGRP849:0.867
chr2L	20223091	+	DGRP461:1.000
chr2L	20311069	-	DGRP321:1.000
chr2L	20311155	-	DGRP502:1.000
chr2L	20311215	+	DGRP49:1.000
chr2L	20429002	-	DGRP321:1.000
chr2L	20523332	-	DGRP566:1.000
chr2L	20714794	+	DGRP703:1.000
chr2L	20716158	-	DGRP45:1.000;DGRP109:0.778
chr2L	20716405	+	DGRP894:1.000
chr2L	20759517	-	DGRP705:1.000
chr2L	20783360	-	DGRP208:1.000;DGRP223:1.000
chr2L	20783999	+	DGRP101:0.857
chr2L	20797707	+	DGRP142:1.000;DGRP409:0.941
chr2L	20821979	+	DGRP336:0.760;DGRP338:0.806
chr2L	20829619	+	DGRP837:1.000
chr2L	20874500	-	DGRP908:1.000
chr2L	20912665	-	DGRP748:1.000
chr2L	20917512	+	DGRP385:1.000;DGRP392:1.000;DGRP395:1.000;DGRP399:1.000
chr2L	20922936	-	DGRP304:1.000;DGRP101:0.577
chr2L	21089165	+	DGRP821:1.000;DGRP857:0.500;DGRP338:0.824
chr2L	21151336	+	DGRP843:1.000
chr2L	21168658	+	DGRP714:0.833
chr2L	21206250	+	DGRP406:1.000
chr2L	21221219	+	DGRP100:1.000;DGRP383:1.000;DGRP398:1.000;DGRP492:1.000;DGRP757:1.000;DGRP855:1.000
chr2L	21250899	-	DGRP595:1.000
chr2L	21304283	+	DGRP748:1.000
chr2L	21309525	-	DGRP761:1.000
chr2L	21310812	-	DGRP315:0.993;DGRP796:0.700
chr2L	21372745	-	DGRP377:0.792;DGRP894:1.000
chr2L	21380170	+	DGRP397:1.000
chr2L	21553516	+	DGRP374:0.974
chr2L	21553516	-	DGRP820:1.000;DGRP737:0.857
chr2L	21553565	-	DGRP595:1.000
chr2L	21571951	-	DGRP324:1.000
chr2L	21582370	-	DGRP40:1.000
chr2L	21625079	-	DGRP513:1.000
chr2L	21630012	+	DGRP233:0.474;DGRP340:0.581
chr2L	21656349	+	DGRP189:1.000;DGRP101:0.692;DGRP177:0.750;DGRP217:0.688;DGRP229:0.622;DGRP375:0.524;DGRP584:0.759;DGRP646:1.000;DGRP73:0.818
chr2L	21677446	+	DGRP378:0.850
chr2L	21677923	-	DGRP177:1.000
chr2L	21682207	+	DGRP208:1.000;DGRP223:1.000
chr2L	21683274	+	DGRP100:0.919
chr2L	21753679	-	DGRP406:1.000
chr2L	21753756	-	DGRP338:0.750;DGRP821:0.594;DGRP857:0.632
chr2L	21753917	-	DGRP303:0.439;DGRP306:0.992
chr2L	21795555	-	DGRP223:1.000
chr2L	21828594	+	DGRP703:1.000
chr2L	22019214	-	DGRP371:1.000
chr2L	22024518	+	DGRP301:0.500;DGRP406:1.000;DGRP227:0.583
chr2L	22024518	-	DGRP315:1.000;DGRP374:0.935
chr2L	22105537	-	DGRP391:1.000
chr2L	22134305	+	DGRP38:1.000;DGRP437:1.000;DGRP45:1.000
chr2L	22579643	-	DGRP195:1.000
chr2L	22729525	-	DGRP49:0.981
chr2L	22762234	-	DGRP843:1.000
chr2L	23399324	+	DGRP802:0.903;DGRP810:1.000;DGRP882:1.000
chr2R	563212	+	DGRP272:1.000;DGRP287:1.000
chr2R	633809	+	DGRP799:1.000
chr2R	1095772	+	DGRP395:0.973
chr2R	1224914	+	DGRP256:1.000
chr2R	1225152	+	DGRP321:1.000
chr2R	1340742	+	DGRP513:1.000
chr2R	1409735	-	DGRP818:1.000;DGRP129:0.571
chr2R	1412160	-	DGRP908:1.000
chr2R	1512839	-	DGRP100:0.238;DGRP32:0.548
chr2R	1531782	-	DGRP441:1.000
chr2R	1591830	+	DGRP589:1.000;DGRP73:0.974;DGRP783:1.000;DGRP790:1.000;DGRP796:0.879;DGRP853:0.828
chr2R	2079637	-	DGRP409:0.935
chr2R	2108859	-	DGRP441:1.000
chr2R	2515034	+	DGRP138:1.000;DGRP393:1.000
chr2R	2897167	-	DGRP712:1.000;DGRP819:1.000;DGRP913:0.448
chr2R	2914149	+	DGRP843:1.000;DGRP738:0.571
chr2R	3202083	-	DGRP101:0.889
chr2R	3549154	+	DGRP374:1.000
chr2R	3549744	+	DGRP502:1.000;DGRP73:0.636
chr2R	4161497	-	DGRP149:1.000
chr2R	4270924	+	DGRP57:1.000
chr2R	4367743	-	DGRP707:1.000;DGRP822:1.000;DGRP892:1.000
chr2R	4544708	+	DGRP217:1.000;DGRP229:1.000
chr2R	4616941	+	DGRP350:1.000;DGRP348:1.000;DGRP358:1.000
chr2R	4696690	-	DGRP362:1.000;DGRP821:0.405
chr2R	4708046	+	DGRP45:1.000
chr2R	5100452	+	DGRP703:1.000
chr2R	5251034	-	DGRP911:1.000
chr2R	5422878	+	DGRP391:1.000
chr2R	5701982	+	DGRP233:0.824
chr2R	5729516	-	DGRP233:1.000
chr2R	5781945	+	DGRP799:1.000
chr2R	5782309	-	DGRP566:1.000
chr2R	5782772	+	DGRP703:1.000
chr2R	6017783	+	DGRP223:1.000
chr2R	6076875	-	DGRP158:1.000
chr2R	6085638	+	DGRP646:1.000;DGRP820:1.000
chr2R	6120664	-	DGRP513:1.000
chr2R	6120737	-	DGRP324:1.000
chr2R	6132110	+	DGRP181:1.000
chr2R	6132110	-	DGRP595:1.000
chr2R	6156374	+	DGRP367:1.000
chr2R	6158950	-	DGRP913:0.916
chr2R	6180436	-	DGRP808:1.000
chr2R	6214221	+	DGRP21:1.000
chr2R	6219534	-	DGRP161:1.000
chr2R	6220440	+	DGRP894:1.000
chr2R	6220495	-	DGRP381:0.800;DGRP287:1.000
chr2R	6220509	+	DGRP319:0.818
chr2R	6220527	+	DGRP21:1.000
chr2R	6220544	+	DGRP639:1.000
chr2R	6236112	+	DGRP100:0.738;DGRP383:1.000;DGRP398:1.000;DGRP492:1.000;DGRP705:1.000;DGRP737:1.000;DGRP879:1.000;DGRP88:0.815;DGRP101:0.636
chr2R	6241880	+	DGRP26:1.000;DGRP367:1.000
chr2R	6258918	+	DGRP535:1.000
chr2R	6267506	+	DGRP73:1.000
chr2R	6436042	-	DGRP32:1.000
chr2R	6470389	-	DGRP303:0.523;DGRP306:1.000
chr2R	6482550	-	DGRP223:1.000
chr2R	6482695	+	DGRP375:0.973
chr2R	6494391	+	DGRP129:1.000;DGRP554:1.000;DGRP555:1.000
chr2R	6501578	+	DGRP426:0.889
chr2R	6501770	+	DGRP738:1.000
chr2R	6501776	-	DGRP646:1.000
chr2R	6501870	+	DGRP21:0.800
chr2R	6501888	+	DGRP177:1.000
chr2R	6501888	-	DGRP217:1.000;DGRP340:1.000
chr2R	6501902	+	DGRP705:1.000
chr2R	6501927	+	DGRP100:0.786;DGRP318:1.000;DGRP426:1.000;DGRP551:1.000
chr2R	6501985	-	DGRP509:1.000
chr2R	6501996	-	DGRP310:1.000
chr2R	6502001	-	DGRP315:1.000
chr2R	6610418	+	DGRP900:1.000;DGRP832:1.000
chr2R	6611096	-	DGRP707:1.000
chr2R	6613016	+	DGRP639:1.000
chr2R	6613195	+	DGRP712:1.000;DGRP819:1.000;DGRP913:0.196
chr2R	6622223	+	DGRP911:1.000
chr2R	6622496	+	DGRP136:1.000
chr2R	6630599	-	DGRP634:1.000
chr2R	6632405	-	DGRP239:0.846
chr2R	6636389	+	DGRP85:0.812
chr2R	6648629	+	DGRP383:1.000;DGRP398:1.000;DGRP492:1.000
chr2R	6662287	+	DGRP223:1.000
chr2R	6715793	+	DGRP359:1.000
chr2R	6715919	-	DGRP109:0.693;DGRP646:1.000
chr2R	6740696	+	DGRP837:1.000
chr2R	6740700	-	DGRP208:1.000;DGRP223:1.000
chr2R	6740715	-	DGRP908:1.000
chr2R	6740719	+	DGRP397:1.000
chr2R	6741888	+	DGRP318:1.000
chr2R	6757369	+	DGRP195:1.000;DGRP361:1.000;DGRP362:0.955;DGRP40:1.000;DGRP530:1.000;DGRP703:1.000;DGRP805:1.000
chr2R	6871712	+	DGRP443:0.833
chr2R	6872053	+	DGRP26:1.000;DGRP367:1.000
chr2R	6872741	-	DGRP440:1.000
chr2R	6985688	-	DGRP812:1.000
chr2R	6985809	+	DGRP85:0.875
chr2R	6985823	+	DGRP799:1.000
chr2R	7011291	+	DGRP223:1.000
chr2R	7015767	-	DGRP340:1.000;DGRP705:1.000;DGRP879:1.000;DGRP93:1.000
chr2R	7024997	+	DGRP382:1.000
chr2R	7024997	-	DGRP352:1.000
chr2R	7025175	-	DGRP738:1.000
chr2R	7040028	-	DGRP361:1.000;DGRP528:0.615;DGRP530:1.000
chr2R	7040169	+	DGRP361:1.000;DGRP362:0.980;DGRP40:1.000;DGRP530:1.000;DGRP596:1.000;DGRP703:1.000;DGRP796:0.500;DGRP805:0.983
chr2R	7045695	+	DGRP627:1.000
chr2R	7147091	+	DGRP812:1.000
chr2R	7150649	-	DGRP373:1.000
chr2R	7150690	+	DGRP26:1.000
chr2R	7187311	+	DGRP900:1.000
chr2R	7245914	+	DGRP318:1.000;DGRP378:0.444;DGRP528:0.680;DGRP849:0.667;DGRP88:0.750
chr2R	7249000	-	DGRP820:1.000
chr2R	7249034	-	DGRP712:1.000;DGRP819:1.000;DGRP913:0.234
chr2R	7352586	-	DGRP390:1.000
chr2R	7382020	-	DGRP639:1.000;DGRP796:0.660
chr2R	7440733	+	DGRP385:1.000;DGRP392:1.000;DGRP395:1.000;DGRP399:1.000
chr2R	7458966	-	DGRP280:1.000
chr2R	7458998	-	DGRP280:1.000
chr2R	7488685	+	DGRP530:1.000
chr2R	7488824	+	DGRP530:1.000
chr2R	7489834	-	DGRP642:1.000
chr2R	7489947	-	DGRP559:1.000;DGRP630:0.920;DGRP802:0.874;DGRP810:1.000;DGRP882:1.000
chr2R	7490003	+	DGRP301:0.828
chr2R	7492487	+	DGRP776:1.000;DGRP887:1.000
chr2R	7493584	+	DGRP559:0.891
chr2R	7513986	-	DGRP256:1.000
chr2R	7566778	+	DGRP233:0.879
chr2R	7597827	+	DGRP303:0.414;DGRP306:1.000
chr2R	7623178	+	DGRP382:1.000
chr2R	7623218	-	DGRP374:1.000;DGRP395:1.000
chr2R	7623266	+	DGRP223:1.000
chr2R	7623314	-	DGRP318:0.979
chr2R	7665700	-	DGRP272:1.000;DGRP287:1.000
chr2R	7665795	+	DGRP69:1.000
chr2R	7782643	-	DGRP21:1.000
chr2R	7783295	+	DGRP319:0.947;DGRP397:1.000;DGRP853:1.000;DGRP859:1.000
chr2R	7806309	+	DGRP287:1.000
chr2R	7806343	+	DGRP320:1.000
chr2R	7955513	-	DGRP129:1.000
chr2R	8145934	-	DGRP321:1.000
chr2R	8145997	-	DGRP559:1.000
chr2R	8152282	-	DGRP374:1.000;DGRP405:0.727;DGRP426:0.741;DGRP272:0.963;DGRP287:1.000
chr2R	8152306	-	DGRP138:0.529;DGRP393:1.000
chr2R	8174199	+	DGRP303:0.949
chr2R	8232463	-	DGRP223:1.000
chr2R	8326922	+	DGRP383:1.000;DGRP398:1.000
chr2R	8327145	+	DGRP371:1.000
chr2R	8327304	-	DGRP908:1.000
chr2R	8462749	-	DGRP639:1.000
chr2R	8600429	+	DGRP301:0.897;DGRP787:1.000
chr2R	8614686	-	DGRP509:1.000
chr2R	8647497	-	DGRP348:1.000;DGRP350:1.000;DGRP358:1.000
chr2R	8655722	+	DGRP509:1.000
chr2R	8655832	+	DGRP802:0.855
chr2R	8655868	-	DGRP426:0.889
chr2R	8667818	+	DGRP233:1.000
chr2R	8668848	+	DGRP378:1.000
chr2R	8670689	+	DGRP208:1.000;DGRP223:1.000
chr2R	8670689	-	DGRP208:1.000
chr2R	8723540	-	DGRP853:1.000;DGRP859:1.000
chr2R	8735794	-	DGRP354:1.000;DGRP355:1.000
chr2R	8860359	-	DGRP229:1.000
chr2R	8860844	+	DGRP239:0.921
chr2R	8862537	+	DGRP491:1.000
chr2R	8947325	+	DGRP783:1.000
chr2R	9044968	+	DGRP405:1.000
chr2R	9129090	-	DGRP850:1.000
chr2R	9132496	+	DGRP380:0.987
chr2R	9139050	+	DGRP31:1.000
chr2R	9186342	-	DGRP911:1.000
chr2R	9186367	+	DGRP439:1.000
chr2R	9186409	-	DGRP31:1.000
chr2R	9192093	-	DGRP374:1.000
chr2R	9231350	-	DGRP161:1.000
chr2R	9247363	+	DGRP820:1.000
chr2R	9270490	-	DGRP382:1.000
chr2R	9307863	+	DGRP509:1.000
chr2R	9308566	-	DGRP799:1.000
chr2R	9308708	-	DGRP287:1.000
chr2R	9387956	-	DGRP105:1.000
chr2R	9409489	-	DGRP732:1.000;DGRP802:0.353
chr2R	9409509	+	DGRP354:1.000;DGRP355:1.000
chr2R	9409640	+	DGRP177:1.000;DGRP319:0.750;DGRP461:1.000
chr2R	9409717	+	DGRP765:1.000;DGRP774:0.805
chr2R	9413468	+	DGRP75:1.000
chr2R	9413468	-	DGRP370:1.000;DGRP738:1.000
chr2R	9426548	+	DGRP105:1.000
chr2R	9441672	-	DGRP397:1.000
chr2R	9444174	-	DGRP757:1.000;DGRP855:1.000
chr2R	9547050	+	DGRP317:1.000
chr2R	9548322	-	DGRP233:1.000
chr2R	9548406	-	DGRP382:1.000
chr2R	9552434	+	DGRP223:1.000
chr2R	9553471	-	DGRP38:1.000
chr2R	9579001	+	DGRP370:1.000
chr2R	9584665	+	DGRP324:1.000
chr2R	9658385	-	DGRP45:1.000;DGRP49:1.000
chr2R	9658389	+	DGRP737:1.000
chr2R	9692046	+	DGRP129:1.000
chr2R	9692051	+	DGRP109:1.000
chr2R	9707439	+	DGRP359:1.000
chr2R	9712293	+	DGRP223:1.000
chr2R	9712305	+	DGRP223:1.000
chr2R	9820134	+	DGRP324:1.000
chr2R	9836495	-	DGRP149:1.000
chr2R	9836599	-	DGRP73:1.000
chr2R	9836716	+	DGRP373:1.000
chr2R	9860897	-	DGRP707:1.000
chr2R	9861826	-	DGRP315:1.000
chr2R	9875347	-	DGRP217:1.000
chr2R	9891712	+	DGRP716:1.000
chr2R	9955366	+	DGRP894:1.000
chr2R	9958541	+	DGRP502:1.000
chr2R	9960078	+	DGRP88:0.971
chr2R	10025616	+	DGRP373:1.000
chr2R	10025773	+	DGRP181:1.000
chr2R	10026855	-	DGRP336:0.667;DGRP338:0.524
chr2R	10056689	+	DGRP787:1.000
chr2R	10056689	-	DGRP911:1.000
chr2R	10056778	+	DGRP138:1.000;DGRP393:1.000
chr2R	10078167	+	DGRP336:0.882
chr2R	10078320	+	DGRP223:1.000
chr2R	10078339	+	DGRP177:1.000;DGRP319:0.714;DGRP461:1.000
chr2R	10078396	-	DGRP440:1.000
chr2R	10099730	-	DGRP595:1.000
chr2R	10101025	-	DGRP559:1.000
chr2R	10117695	+	DGRP233:1.000
chr2R	10117941	-	DGRP233:1.000
chr2R	10211199	+	DGRP158:1.000
chr2R	10238334	+	DGRP101:1.000;DGRP374:1.000
chr2R	10279169	-	DGRP630:1.000;DGRP639:1.000;DGRP802:0.976;DGRP810:1.000
chr2R	10304054	-	DGRP377:0.938
chr2R	10468658	-	DGRP796:1.000
chr2R	10477951	+	DGRP340:1.000
chr2R	10534410	+	DGRP45:1.000;DGRP49:1.000
chr2R	10535057	-	DGRP223:1.000
chr2R	10535132	-	DGRP223:1.000;DGRP804:0.529
chr2R	10535747	+	DGRP256:1.000
chr2R	10536310	+	DGRP850:1.000
chr2R	10536382	+	DGRP217:1.000
chr2R	10540561	+	DGRP21:1.000
chr2R	10540566	+	DGRP646:1.000
chr2R	10541671	-	DGRP887:0.875
chr2R	10541686	+	DGRP757:1.000;DGRP855:1.000
chr2R	10541686	-	DGRP822:1.000
chr2R	10541709	+	DGRP321:0.500;DGRP348:1.000;DGRP350:1.000;DGRP358:1.000;DGRP566:1.000;DGRP627:0.930;DGRP796:1.000
chr2R	10541710	-	DGRP136:1.000
chr2R	10541727	+	DGRP83:1.000
chr2R	10542301	-	DGRP136:1.000
chr2R	10551846	+	DGRP409:1.000
chr2R	10551927	+	DGRP853:1.000;DGRP859:0.976
chr2R	10559776	+	DGRP796:1.000
chr2R	10583385	+	DGRP738:1.000
chr2R	10618472	-	DGRP360:0.975;DGRP907:1.000
chr2R	10673277	+	DGRP176:1.000;DGRP513:1.000
chr2R	10673366	+	DGRP374:1.000
chr2R	10731600	+	DGRP374:1.000
chr2R	10808932	+	DGRP370:1.000
chr2R	10874746	+	DGRP630:0.923;DGRP639:1.000;DGRP802:0.946;DGRP810:1.000
chr2R	10874751	-	DGRP136:1.000;DGRP161:1.000;DGRP354:1.000;DGRP355:1.000;DGRP551:0.980;DGRP639:1.000;DGRP802:0.957;DGRP810:1.000;DGRP837:1.000
chr2R	11103240	-	DGRP304:1.000
chr2R	11173766	+	DGRP233:0.976
chr2R	11197252	+	DGRP859:1.000
chr2R	11197373	-	DGRP195:1.000
chr2R	11197442	-	DGRP370:1.000
chr2R	11197503	-	DGRP181:1.000
chr2R	11198275	+	DGRP69:1.000
chr2R	11203743	+	DGRP426:0.833
chr2R	11204566	-	DGRP703:1.000
chr2R	11204601	-	DGRP437:1.000
chr2R	11204606	+	DGRP223:1.000;DGRP589:1.000;DGRP712:1.000;DGRP748:1.000;DGRP783:1.000
chr2R	11204606	-	DGRP712:1.000;DGRP783:1.000
chr2R	11204633	+	DGRP821:0.808
chr2R	11232086	+	DGRP900:1.000
chr2R	11232529	+	DGRP737:1.000
chr2R	11232940	+	DGRP596:0.806
chr2R	11232940	-	DGRP301:1.000
chr2R	11233018	+	DGRP703:1.000
chr2R	11256270	-	DGRP307:1.000
chr2R	11297425	+	DGRP75:1.000
chr2R	11371137	+	DGRP320:1.000
chr2R	11371150	-	DGRP69:1.000;DGRP707:1.000
chr2R	11388398	+	DGRP181:1.000
chr2R	11397434	-	DGRP100:1.000;DGRP304:1.000;DGRP757:0.652
chr2R	11397910	-	DGRP703:1.000
chr2R	11398106	+	DGRP727:1.000
chr2R	11436221	-	DGRP761:1.000;DGRP812:1.000
chr2R	11604930	-	DGRP887:1.000
chr2R	11605229	+	DGRP491:1.000;DGRP804:0.872
chr2R	11614506	-	DGRP703:1.000
chr2R	11615088	+	DGRP362:1.000
chr2R	11648752	+	DGRP383:1.000;DGRP398:1.000
chr2R	11712188	+	DGRP75:1.000
chr2R	11757724	-	DGRP707:1.000
chr2R	11851910	-	DGRP303:0.860
chr2R	11899550	-	DGRP149:1.000
chr2R	11930406	+	DGRP177:1.000;DGRP319:1.000;DGRP461:1.000
chr2R	12019881	+	DGRP93:1.000
chr2R	12045171	-	DGRP317:1.000;DGRP318:1.000;DGRP378:1.000;DGRP528:0.750
chr2R	12054964	+	DGRP73:1.000
chr2R	12163092	-	DGRP83:1.000
chr2R	12174366	-	DGRP406:1.000
chr2R	12438989	+	DGRP85:1.000
chr2R	12474367	+	DGRP332:1.000
chr2R	12494200	+	DGRP149:1.000
chr2R	12529032	-	DGRP362:0.968
chr2R	12587238	-	DGRP223:1.000
chr2R	12587425	-	DGRP287:0.857
chr2R	12589641	-	DGRP705:1.000
chr2R	12589699	-	DGRP819:1.000
chr2R	12589729	+	DGRP908:1.000
chr2R	12589729	-	DGRP703:1.000
chr2R	12590098	+	DGRP859:1.000
chr2R	12593604	+	DGRP287:1.000
chr2R	12593635	+	DGRP256:1.000
chr2R	12593692	+	DGRP714:0.809
chr2R	12635832	+	DGRP584:1.000
chr2R	12652828	+	DGRP908:1.000
chr2R	12670225	-	DGRP426:0.636;DGRP509:1.000
chr2R	12670234	-	DGRP646:1.000
chr2R	12670240	+	DGRP109:1.000
chr2R	12679634	-	DGRP566:1.000
chr2R	12679678	-	DGRP776:1.000
chr2R	12679731	+	DGRP776:1.000
chr2R	12679731	-	DGRP566:1.000
chr2R	12700076	-	DGRP559:1.000
chr2R	12705177	-	DGRP223:1.000
chr2R	12705262	+	DGRP390:1.000
chr2R	12780164	-	DGRP737:1.000
chr2R	12780374	+	DGRP217:1.000;DGRP361:1.000
chr2R	12780412	-	DGRP195:1.000;DGRP716:1.000
chr2R	12780430	+	DGRP391:1.000;DGRP804:1.000;DGRP894:1.000
chr2R	12780430	-	DGRP336:0.579;DGRP908:1.000
chr2R	12780458	-	DGRP217:1.000;DGRP361:1.000;DGRP57:0.974
chr2R	12780508	-	DGRP332:1.000
chr2R	12862489	+	DGRP362:1.000;DGRP307:1.000;DGRP318:0.706;DGRP321:0.789;DGRP69:0.647;DGRP716:0.714;DGRP799:1.000;DGRP805:1.000;DGRP879:1.000;DGRP913:1.000
chr2R	12868947	-	DGRP630:0.968;DGRP748:1.000;DGRP787:1.000;DGRP796:1.000;DGRP801:0.977;DGRP802:0.917;DGRP810:1.000
chr2R	12936872	+	DGRP181:1.000
chr2R	12957911	+	DGRP304:1.000
chr2R	12960219	+	DGRP40:1.000
chr2R	12980897	+	DGRP321:1.000
chr2R	12980918	+	DGRP227:1.000
chr2R	12980988	-	DGRP837:1.000
chr2R	12981213	+	DGRP158:1.000
chr2R	12991983	+	DGRP378:0.818
chr2R	12996509	+	DGRP776:1.000
chr2R	12996526	-	DGRP45:1.000;DGRP49:1.000
chr2R	12997263	-	DGRP109:1.000;DGRP138:0.875
chr2R	13035197	+	DGRP805:1.000
chr2R	13035197	-	DGRP129:1.000
chr2R	13035527	+	DGRP630:0.941;DGRP748:1.000;DGRP787:1.000;DGRP796:1.000;DGRP810:1.000
chr2R	13035535	-	DGRP31:1.000
chr2R	13042193	-	DGRP646:1.000;DGRP757:1.000
chr2R	13167975	-	DGRP227:1.000
chr2R	13168042	-	DGRP596:1.000
chr2R	13198112	+	DGRP837:1.000
chr2R	13198910	+	DGRP332:1.000
chr2R	13219349	+	DGRP354:1.000;DGRP355:1.000
chr2R	13219349	-	DGRP303:0.475;DGRP306:1.000;DGRP371:1.000;DGRP57:1.000;DGRP59:1.000
chr2R	13225314	-	DGRP287:1.000
chr2R	13251723	-	DGRP382:1.000
chr2R	13437620	+	DGRP280:1.000;DGRP45:1.000;DGRP49:1.000
chr2R	13502151	+	DGRP439:1.000
chr2R	13502276	+	DGRP491:1.000
chr2R	13502685	-	DGRP820:0.818
chr2R	13558119	-	DGRP721:1.000
chr2R	13593281	-	DGRP707:1.000
chr2R	13623007	+	DGRP315:1.000;DGRP319:0.882;DGRP360:1.000;DGRP426:0.643
chr2R	13623014	+	DGRP189:1.000
chr2R	13803981	+	DGRP149:1.000
chr2R	13822972	+	DGRP91:1.000
chr2R	13871475	+	DGRP57:1.000
chr2R	13925589	+	DGRP189:0.986
chr2R	13925758	-	DGRP318:1.000;DGRP378:1.000
chr2R	13939907	-	DGRP596:1.000
chr2R	13939967	+	DGRP861:1.000
chr2R	13940415	-	DGRP161:1.000
chr2R	13954149	+	DGRP370:1.000
chr2R	13964675	+	DGRP75:1.000
chr2R	13964692	-	DGRP703:1.000
chr2R	13978563	+	DGRP380:0.987
chr2R	13993260	+	DGRP272:1.000;DGRP287:1.000
chr2R	14001028	-	DGRP49:1.000
chr2R	14001084	+	DGRP393:1.000
chr2R	14001085	-	DGRP287:1.000
chr2R	14007184	+	DGRP356:1.000
chr2R	14031591	-	DGRP287:1.000
chr2R	14044299	-	DGRP356:1.000
chr2R	14157481	-	DGRP321:0.988
chr2R	14164690	-	DGRP272:1.000;DGRP287:1.000
chr2R	14174946	+	DGRP397:1.000
chr2R	14259034	+	DGRP359:1.000
chr2R	14259061	-	DGRP879:1.000
chr2R	14307326	-	DGRP348:1.000;DGRP391:1.000
chr2R	14308078	-	DGRP790:1.000
chr2R	14332343	-	DGRP31:1.000
chr2R	14458393	-	DGRP338:0.652;DGRP821:0.482
chr2R	14605873	-	DGRP228:1.000
chr2R	14713640	-	DGRP38:1.000
chr2R	14713655	-	DGRP304:1.000
chr2R	14713663	-	DGRP738:1.000;DGRP805:1.000
chr2R	14713681	-	DGRP861:1.000
chr2R	14713735	-	DGRP646:1.000
chr2R	14765872	-	DGRP356:1.000
chr2R	14769142	+	DGRP309:1.000
chr2R	14769458	-	DGRP381:1.000;DGRP426:0.917
chr2R	14962311	-	DGRP783:1.000
chr2R	14981369	+	DGRP340:1.000
chr2R	15128407	-	DGRP57:1.000
chr2R	15128815	-	DGRP879:1.000
chr2R	15248738	+	DGRP239:0.586;DGRP596:1.000
chr2R	15309046	+	DGRP338:0.607;DGRP821:0.714;DGRP857:1.000
chr2R	15482847	+	DGRP177:1.000;DGRP319:0.842;DGRP461:1.000
chr2R	15609439	+	DGRP223:1.000
chr2R	15610146	-	DGRP513:1.000
chr2R	15610901	-	DGRP627:1.000
chr2R	15610986	+	DGRP217:1.000;DGRP810:1.000
chr2R	15611279	-	DGRP101:0.889
chr2R	15613638	-	DGRP887:1.000
chr2R	15613666	+	DGRP900:1.000
chr2R	15613712	-	DGRP810:1.000
chr2R	15613745	+	DGRP340:1.000
chr2R	15613816	+	DGRP57:1.000
chr2R	15613816	-	DGRP646:1.000;DGRP716:1.000;DGRP732:1.000;DGRP757:1.000
chr2R	15613853	-	DGRP530:1.000
chr2R	15676227	+	DGRP93:1.000
chr2R	15861263	+	DGRP721:1.000
chr2R	15931320	+	DGRP913:1.000
chr2R	16001262	+	DGRP502:1.000
chr2R	16103078	-	DGRP383:1.000;DGRP398:1.000
chr2R	16130154	+	DGRP161:1.000
chr2R	16130285	+	DGRP317:1.000
chr2R	16138712	-	DGRP319:0.647;DGRP461:1.000;DGRP646:1.000
chr2R	16148977	-	DGRP716:1.000;DGRP732:1.000
chr2R	16150203	-	DGRP392:1.000;DGRP399:1.000
chr2R	16184133	-	DGRP239:1.000
chr2R	16210494	-	DGRP397:1.000
chr2R	16230205	+	DGRP409:0.258;DGRP584:0.991
chr2R	16333990	-	DGRP57:1.000;DGRP776:1.000
chr2R	16336674	-	DGRP93:1.000
chr2R	16336675	+	DGRP319:0.933;DGRP336:0.688;DGRP461:1.000
chr2R	16386296	+	DGRP138:1.000
chr2R	16386433	+	DGRP223:1.000
chr2R	16386481	-	DGRP223:1.000
chr2R	16386527	+	DGRP508:1.000;DGRP563:0.568;DGRP727:1.000
chr2R	16580851	-	DGRP310:1.000
chr2R	16583551	+	DGRP280:0.970;DGRP837:1.000
chr2R	16583890	+	DGRP223:1.000
chr2R	16584024	-	DGRP381:1.000
chr2R	16594581	-	DGRP776:1.000
chr2R	16594610	+	DGRP646:1.000
chr2R	16828688	+	DGRP223:1.000
chr2R	16828726	+	DGRP177:1.000;DGRP324:1.000
chr2R	16828873	-	DGRP217:1.000
chr2R	16828934	+	DGRP894:1.000
chr2R	16828952	-	DGRP378:1.000
chr2R	16829042	+	DGRP509:0.961
chr2R	16829080	+	DGRP256:1.000
chr2R	16829080	-	DGRP303:0.881
chr2R	16829085	-	DGRP233:0.861
chr2R	16830434	-	DGRP390:0.471;DGRP57:1.000
chr2R	16856460	-	DGRP517:1.000
chr2R	16856473	+	DGRP437:1.000
chr2R	16856473	-	DGRP378:1.000
chr2R	16857178	-	DGRP761:1.000
chr2R	16857243	-	DGRP100:1.000
chr2R	16857274	+	DGRP714:1.000
chr2R	16868247	+	DGRP783:1.000;DGRP787:0.529
chr2R	16869624	-	DGRP318:1.000
chr2R	17005489	+	DGRP508:1.000
chr2R	17097798	+	DGRP714:1.000
chr2R	17097857	-	DGRP843:1.000
chr2R	17100161	+	DGRP105:1.000
chr2R	17108642	-	DGRP85:1.000
chr2R	17143621	+	DGRP361:1.000
chr2R	17394562	+	DGRP584:1.000
chr2R	17411606	+	DGRP332:1.000
chr2R	17411684	-	DGRP40:1.000
chr2R	17420817	+	DGRP85:1.000
chr2R	17420857	-	DGRP491:1.000
chr2R	17421355	-	DGRP381:1.000
chr2R	17422160	+	DGRP531:1.000
chr2R	17452635	+	DGRP228:1.000
chr2R	17452652	-	DGRP26:1.000
chr2R	17462509	-	DGRP714:0.839
chr2R	17469190	+	DGRP819:1.000
chr2R	17484863	+	DGRP158:1.000
chr2R	17545247	-	DGRP49:0.964
chr2R	17548243	-	DGRP233:1.000;DGRP630:1.000;DGRP639:1.000
chr2R	17563557	+	DGRP492:1.000
chr2R	17568473	+	DGRP45:1.000
chr2R	17584395	+	DGRP584:1.000
chr2R	17719462	-	DGRP913:0.894
chr2R	17719488	-	DGRP513:1.000
chr2R	17719556	+	DGRP513:1.000
chr2R	17719631	-	DGRP317:1.000
chr2R	17760953	+	DGRP630:0.963;DGRP639:1.000
chr2R	17801735	-	DGRP91:1.000
chr2R	17850308	+	DGRP799:1.000
chr2R	17850897	+	DGRP441:1.000
chr2R	17873833	-	DGRP88:1.000
chr2R	18128443	+	DGRP502:1.000
chr2R	18142233	-	DGRP32:0.992
chr2R	18171539	-	DGRP712:1.000
chr2R	18171543	-	DGRP21:1.000
chr2R	18184066	+	DGRP804:0.954
chr2R	18288799	-	DGRP32:1.000
chr2R	18356158	+	DGRP528:0.800;DGRP563:0.619
chr2R	18356335	-	DGRP69:1.000
chr2R	18357722	-	DGRP443:1.000
chr2R	18412791	+	DGRP383:1.000;DGRP398:1.000
chr2R	18440946	+	DGRP307:1.000
chr2R	18503569	+	DGRP595:1.000
chr2R	18503630	-	DGRP790:1.000
chr2R	18611931	+	DGRP161:1.000
chr2R	18652333	+	DGRP727:1.000
chr2R	18652815	+	DGRP158:0.875
chr2R	18652944	-	DGRP361:1.000
chr2R	18654269	-	DGRP361:1.000
chr2R	18673556	+	DGRP383:1.000
chr2R	18673556	-	DGRP383:1.000
chr2R	18673622	-	DGRP732:1.000;DGRP776:1.000
chr2R	18689818	-	DGRP362:0.846
chr2R	18694137	-	DGRP301:1.000
chr2R	18717504	+	DGRP100:1.000
chr2R	18717988	+	DGRP48:1.000
chr2R	18755295	-	DGRP45:1.000
chr2R	18799509	-	DGRP630:1.000;DGRP639:1.000
chr2R	18802700	-	DGRP535:1.000
chr2R	18806374	+	DGRP802:1.000
chr2R	18835267	-	DGRP843:1.000
chr2R	18853466	-	DGRP375:1.000
chr2R	18858042	-	DGRP227:1.000;DGRP801:0.979
chr2R	18878368	-	DGRP383:1.000;DGRP398:1.000
chr2R	18878389	-	DGRP359:1.000
chr2R	18879175	-	DGRP352:1.000
chr2R	19228970	+	DGRP461:1.000
chr2R	19229048	-	DGRP303:0.551;DGRP306:1.000
chr2R	19269098	-	DGRP820:1.000
chr2R	19275296	+	DGRP362:0.977
chr2R	19290128	+	DGRP383:1.000;DGRP398:1.000
chr2R	19325593	-	DGRP409:1.000
chr2R	19356547	-	DGRP318:1.000;DGRP378:1.000
chr2R	19358244	-	DGRP208:1.000
chr2R	19395184	-	DGRP57:1.000
chr2R	19395947	-	DGRP849:1.000
chr2R	19424094	+	DGRP149:1.000
chr2R	19424215	+	DGRP530:1.000
chr2R	19425607	+	DGRP303:0.555;DGRP306:1.000
chr2R	19450708	+	DGRP239:0.806
chr2R	19450723	+	DGRP332:1.000
chr2R	19451700	-	DGRP505:1.000
chr2R	19456766	+	DGRP513:0.976
chr2R	19457046	-	DGRP639:1.000;DGRP75:1.000;DGRP801:1.000
chr2R	19467251	+	DGRP850:1.000;DGRP853:1.000;DGRP859:1.000
chr2R	19468070	+	DGRP551:1.000
chr2R	19631941	+	DGRP100:1.000
chr2R	19632027	-	DGRP646:1.000
chr2R	19832419	-	DGRP737:1.000;DGRP907:1.000
chr2R	19846374	+	DGRP101:1.000
chr2R	20244973	-	DGRP634:1.000;DGRP884:1.000
chr2R	20274499	-	DGRP790:1.000
chr2R	20274576	+	DGRP360:1.000;DGRP377:0.769
chr2R	20312387	+	DGRP630:1.000;DGRP761:1.000;DGRP796:1.000
chr2R	20313699	-	DGRP223:1.000
chr2R	20320174	-	DGRP332:1.000
chr2R	20327668	+	DGRP837:1.000
chr2R	20327949	-	DGRP355:1.000
chr2R	20496650	-	DGRP391:0.826
chr2R	20582178	+	DGRP843:0.855
chr2R	20582751	-	DGRP181:1.000
chr2R	20584450	+	DGRP303:0.841
chr2R	20602858	-	DGRP799:1.000
chr2R	20697919	+	DGRP857:1.000
chr2R	20698317	+	DGRP380:1.000;DGRP85:0.970
chr2R	20698400	-	DGRP528:1.000;DGRP100:1.000;DGRP509:1.000
chr2R	20698411	-	DGRP195:1.000;DGRP721:1.000
chr2R	20698414	+	DGRP223:0.851;DGRP375:0.526
chr2R	20698415	-	DGRP395:0.964;DGRP837:1.000
chr2R	20836102	-	DGRP227:1.000;DGRP646:1.000
chr2R	20836117	+	DGRP517:0.990;DGRP239:0.545
chr2R	20836484	+	DGRP32:1.000
chr2R	20943702	-	DGRP426:0.833
chr2R	21056889	+	DGRP340:1.000
chr2R	21056889	-	DGRP340:1.000
chr2R	21074128	+	DGRP535:1.000
chr2R	21075196	-	DGRP890:1.000
chr2R	21139730	+	DGRP233:1.000
chr2R	21175228	-	DGRP405:1.000;DGRP377:0.875;DGRP808:1.000
chr2R	21175319	+	DGRP109:1.000
chr2R	21179044	+	DGRP502:1.000
chr2R	21202795	-	DGRP149:1.000
chr2R	21297012	+	DGRP31:1.000
chr2R	21323292	-	DGRP21:1.000
chr2R	21379272	+	DGRP272:0.969
chr2R	21379272	-	DGRP336:0.708;DGRP338:0.600
chr2R	21379466	-	DGRP321:1.000;DGRP887:0.786
chr2R	21379493	+	DGRP129:1.000
chr2R	21379527	-	DGRP32:1.000;DGRP517:1.000;DGRP530:1.000;DGRP59:1.000
chr2R	21379538	-	DGRP239:1.000
chr2R	21379548	-	DGRP505:1.000
chr2R	21379594	+	DGRP158:1.000;DGRP380:0.982
chr2R	21379615	+	DGRP176:1.000
chr2R	21379615	-	DGRP783:1.000
chr2R	21379974	-	DGRP440:1.000
chr2R	21475441	+	DGRP100:1.000;DGRP307:1.000;DGRP727:1.000
chr2R	21475441	-	DGRP849:1.000
chr2R	21475456	+	DGRP530:1.000
chr2R	21481572	+	DGRP136:1.000
chr2R	21497215	+	DGRP307:1.000
chr2R	21497479	+	DGRP320:1.000
chr2R	21497633	-	DGRP38:1.000
chr2R	21607157	-	DGRP176:1.000
chr2R	21607212	+	DGRP223:1.000
chr2R	21607226	+	DGRP441:1.000
chr2R	21607655	+	DGRP897:1.000
chr2R	21608347	-	DGRP136:1.000
chr2R	21639781	-	DGRP426:0.909
chr2R	21646033	+	DGRP69:1.000
chr2R	21646037	+	DGRP138:1.000
chr2R	21646143	+	DGRP101:0.318;DGRP272:1.000;DGRP287:1.000;DGRP837:1.000;DGRP398:1.000
chr2R	21646189	-	DGRP513:1.000
chr2R	21646610	-	DGRP559:1.000;DGRP818:0.985;DGRP882:1.000;DGRP887:1.000;DGRP908:0.698
chr2R	21646709	-	DGRP566:1.000
chr2R	21661986	+	DGRP340:1.000
chr2R	21713607	-	DGRP354:1.000
chr2R	21871975	+	DGRP321:1.000;DGRP358:1.000
chr2R	21871975	-	DGRP321:1.000
chr2R	21978322	+	DGRP272:1.000;DGRP287:1.000
chr2R	22039630	-	DGRP320:1.000
chr2R	22039665	-	DGRP443:1.000
chr2R	22073327	+	DGRP176:1.000
chr2R	22100496	-	DGRP508:1.000
chr2R	22137032	-	DGRP338:0.900
chr2R	22142299	-	DGRP91:1.000
chr2R	22197298	+	DGRP227:1.000
chr2R	22212510	+	DGRP596:0.974
chr2R	22212865	+	DGRP85:1.000
chr2R	22243194	-	DGRP136:1.000
chr2R	22270602	+	DGRP304:1.000
chr2R	22403865	+	DGRP383:1.000
chr2R	22453474	-	DGRP158:1.000
chr2R	22514149	+	DGRP208:1.000;DGRP355:1.000
chr2R	22514618	+	DGRP787:1.000
chr2R	22514664	+	DGRP642:1.000
chr2R	22593002	+	DGRP367:1.000
chr2R	22661662	+	DGRP309:1.000
chr2R	22689073	-	DGRP707:1.000
chr2R	22689137	+	DGRP309:1.000
chr2R	22798328	-	DGRP69:1.000
chr2R	22798413	+	DGRP707:1.000
chr2R	22798511	-	DGRP406:1.000;DGRP49:1.000
chr2R	22886516	-	DGRP861:1.000
chr2R	22888885	-	DGRP843:1.000;DGRP879:1.000
chr2R	22998935	+	DGRP101:1.000;DGRP748:1.000
chr2R	22998935	-	DGRP887:1.000
chr2R	23067511	-	DGRP301:1.000
chr2R	23101704	-	DGRP566:1.000
chr2R	23158439	-	DGRP85:1.000
chr2R	23165438	+	DGRP69:1.000
chr2R	23204066	+	DGRP73:1.000
chr2R	23204502	+	DGRP49:1.000
chr2R	23205183	-	DGRP508:1.000
chr2R	23266011	-	DGRP738:1.000
chr2R	23266077	-	DGRP223:1.000
chr2R	23354215	+	DGRP787:1.000
chr2R	23408900	+	DGRP783:1.000
chr2R	23426201	+	DGRP897:1.000
chr2R	23426623	+	DGRP239:1.000;DGRP810:1.000
chr2R	23428908	-	DGRP897:1.000
chr2R	23443932	-	DGRP887:1.000
chr2R	23443954	-	DGRP642:1.000
chr2R	23547979	-	DGRP304:1.000
chr2R	23572561	+	DGRP223:1.000
chr2R	23580706	+	DGRP584:1.000
chr2R	23580807	-	DGRP505:1.000
chr2R	23580813	-	DGRP441:1.000
chr2R	23580837	+	DGRP513:1.000
chr2R	23580851	+	DGRP584:1.000
chr2R	23580857	-	DGRP374:1.000
chr2R	23580915	-	DGRP531:1.000
chr2R	23663569	+	DGRP397:1.000;DGRP774:1.000
chr2R	23713100	+	DGRP630:1.000;DGRP761:1.000;DGRP790:1.000;DGRP796:1.000;DGRP801:0.958;DGRP802:0.971
chr2R	23744889	-	DGRP303:0.861
chr2R	23861923	+	DGRP783:1.000;DGRP787:0.571
chr2R	23862583	+	DGRP48:1.000;DGRP492:1.000
chr2R	23862583	-	DGRP48:1.000;DGRP492:1.000
chr2R	23871535	+	DGRP195:1.000
chr2R	24034017	+	DGRP589:1.000;DGRP646:0.952;DGRP799:1.000;DGRP821:0.832
chr2R	24114328	-	DGRP703:1.000
chr2R	24186749	-	DGRP315:0.993
chr2R	24242669	-	DGRP318:1.000;DGRP378:1.000
chr2R	24294071	+	DGRP315:1.000
chr2R	24305882	-	DGRP93:1.000
chr2R	24305890	+	DGRP318:1.000
chr2R	24334164	-	DGRP409:0.889
chr2R	24334392	+	DGRP383:1.000;DGRP398:1.000
chr2R	24526166	-	DGRP634:1.000;DGRP765:1.000;DGRP859:1.000
chr2R	24532025	+	DGRP85:1.000
chr2R	24607217	+	DGRP443:1.000
chr2R	24631006	+	DGRP595:1.000
chr2R	24631032	+	DGRP381:1.000
chr2R	24687970	+	DGRP45:1.000
chr2R	24736697	-	DGRP397:1.000
chr2R	24736769	+	DGRP233:0.975;DGRP502:1.000
chr2R	24736769	-	DGRP301:1.000
chr2R	24874970	+	DGRP897:0.984
chr2R	24881729	-	DGRP810:1.000
chr2R	24891429	-	DGRP88:1.000
chr2R	24891587	-	DGRP309:1.000
chr2R	24928281	-	DGRP738:1.000
chr2R	24940443	-	DGRP787:0.800
chr2R	24942686	+	DGRP73:1.000
chr2R	24942686	-	DGRP73:1.000
chr2R	24964293	-	DGRP359:1.000
chr2R	24964454	-	DGRP563:0.833
chr2R	24986919	+	DGRP748:1.000
chr2R	25129467	+	DGRP301:0.977;DGRP303:0.062
chr2R	25215205	-	DGRP223:1.000
chr2R	25257571	-	DGRP595:1.000
chr3L	34247	+	DGRP374:1.000
chr3L	40584	-	DGRP409:0.950
chr3L	40626	-	DGRP716:1.000
chr3L	123148	+	DGRP849:1.000
chr3L	128538	+	DGRP38:1.000
chr3L	131523	+	DGRP227:1.000
chr3L	131780	-	DGRP374:1.000;DGRP897:1.000
chr3L	131784	-	DGRP894:1.000
chr3L	131793	+	DGRP142:1.000
chr3L	131806	-	DGRP373:1.000
chr3L	140537	-	DGRP75:1.000
chr3L	140940	+	DGRP554:1.000;DGRP555:1.000
chr3L	165182	+	DGRP318:1.000
chr3L	223732	+	DGRP319:1.000;DGRP382:1.000
chr3L	225379	-	DGRP370:1.000
chr3L	261862	-	DGRP381:1.000
chr3L	319068	+	DGRP100:1.000
chr3L	319618	-	DGRP630:0.929
chr3L	319734	+	DGRP391:1.000;DGRP859:1.000;DGRP900:1.000
chr3L	319991	+	DGRP395:1.000
chr3L	320086	-	DGRP57:1.000
chr3L	543445	-	DGRP646:1.000
chr3L	543459	-	DGRP176:1.000;DGRP405:1.000
chr3L	544190	-	DGRP109:1.000;DGRP340:1.000
chr3L	604027	+	DGRP380:1.000
chr3L	616639	-	DGRP189:1.000
chr3L	628140	-	DGRP437:0.990
chr3L	639590	+	DGRP461:1.000
chr3L	685493	-	DGRP441:1.000
chr3L	699032	+	DGRP373:1.000
chr3L	699750	+	DGRP136:0.900
chr3L	707892	+	DGRP136:0.875
chr3L	707896	+	DGRP223:1.000
chr3L	707896	-	DGRP405:1.000
chr3L	707913	+	DGRP26:1.000
chr3L	707913	-	DGRP26:1.000
chr3L	708090	+	DGRP21:1.000
chr3L	708235	-	DGRP223:0.930
chr3L	708244	+	DGRP639:1.000
chr3L	708356	-	DGRP176:1.000;DGRP378:0.857;DGRP440:1.000
chr3L	708461	+	DGRP317:1.000
chr3L	710350	-	DGRP551:1.000
chr3L	711384	+	DGRP563:1.000
chr3L	711902	+	DGRP358:1.000
chr3L	748604	-	DGRP554:1.000;DGRP555:1.000
chr3L	748637	-	DGRP371:1.000
chr3L	749314	+	DGRP49:1.000;DGRP757:0.435
chr3L	749314	-	DGRP843:1.000
chr3L	749342	+	DGRP233:0.951
chr3L	749342	-	DGRP354:1.000;DGRP355:1.000;DGRP843:1.000;DGRP879:1.000
chr3L	882019	-	DGRP714:0.971
chr3L	959488	-	DGRP223:1.000
chr3L	1101620	-	DGRP405:1.000
chr3L	1102488	+	DGRP340:1.000
chr3L	1177386	+	DGRP505:1.000
chr3L	1177390	+	DGRP406:1.000
chr3L	1196328	-	DGRP229:1.000
chr3L	1208395	-	DGRP359:1.000;DGRP530:1.000
chr3L	1208402	+	DGRP354:1.000;DGRP355:1.000;DGRP765:1.000;DGRP837:1.000
chr3L	1208402	-	DGRP528:1.000
chr3L	1318447	+	DGRP223:0.978
chr3L	1334935	+	DGRP272:1.000;DGRP287:1.000
chr3L	1335330	+	DGRP397:1.000;DGRP627:1.000
chr3L	1368126	-	DGRP551:1.000
chr3L	1401752	-	DGRP716:1.000
chr3L	1463702	+	DGRP380:0.987
chr3L	1463702	-	DGRP233:1.000;DGRP646:0.440
chr3L	1463706	-	DGRP317:1.000
chr3L	1475318	-	DGRP227:1.000
chr3L	1517283	+	DGRP405:1.000
chr3L	1545830	-	DGRP441:1.000
chr3L	1546112	+	DGRP505:1.000
chr3L	1546116	-	DGRP832:1.000
chr3L	1546375	-	DGRP439:1.000
chr3L	1586444	+	DGRP49:1.000;DGRP820:1.000
chr3L	1586444	-	DGRP217:1.000
chr3L	1586547	-	DGRP819:1.000;DGRP189:1.000;DGRP332:1.000
chr3L	1586551	+	DGRP272:0.818;DGRP48:1.000;DGRP714:1.000
chr3L	1586551	-	DGRP208:1.000;DGRP356:1.000;DGRP596:1.000
chr3L	1586558	-	DGRP808:1.000
chr3L	1586562	-	DGRP707:1.000
chr3L	1586568	+	DGRP849:0.990
chr3L	1586601	+	DGRP559:1.000
chr3L	1586601	-	DGRP105:1.000;DGRP91:1.000;DGRP727:1.000
chr3L	1586667	-	DGRP229:1.000
chr3L	1586680	-	DGRP820:1.000
chr3L	1628371	+	DGRP406:1.000
chr3L	1628474	-	DGRP535:1.000
chr3L	1652951	-	DGRP714:1.000
chr3L	1688731	+	DGRP177:1.000
chr3L	1688760	+	DGRP272:1.000;DGRP287:1.000
chr3L	1688764	+	DGRP378:0.900
chr3L	1688776	+	DGRP535:1.000
chr3L	1688824	+	DGRP882:1.000
chr3L	1794356	-	DGRP502:1.000;DGRP642:1.000;DGRP799:1.000
chr3L	1794370	-	DGRP642:1.000;DGRP799:1.000
chr3L	1848518	+	DGRP177:1.000
chr3L	1862006	-	DGRP280:1.000
chr3L	1884950	-	DGRP40:1.000
chr3L	1920455	-	DGRP280:1.000
chr3L	1967893	+	DGRP383:1.000;DGRP398:1.000
chr3L	1970115	+	DGRP383:1.000
chr3L	2107594	+	DGRP820:1.000
chr3L	2107594	-	DGRP272:1.000;DGRP287:1.000;DGRP820:1.000
chr3L	2107637	-	DGRP358:1.000
chr3L	2107722	-	DGRP217:1.000
chr3L	2115676	+	DGRP105:1.000
chr3L	2151798	-	DGRP491:1.000
chr3L	2256952	-	DGRP787:1.000
chr3L	2322571	+	DGRP381:1.000
chr3L	2322571	-	DGRP381:1.000;DGRP513:1.000
chr3L	2417407	-	DGRP73:1.000
chr3L	2417414	-	DGRP392:1.000
chr3L	2417924	+	DGRP380:1.000
chr3L	2465731	+	DGRP45:1.000
chr3L	2589720	-	DGRP837:1.000
chr3L	2636520	+	DGRP317:1.000
chr3L	2782277	-	DGRP223:1.000
chr3L	3060212	+	DGRP338:1.000
chr3L	3072443	-	DGRP884:1.000
chr3L	3107302	-	DGRP332:1.000
chr3L	3149449	-	DGRP406:1.000;DGRP492:1.000
chr3L	3197622	+	DGRP129:1.000
chr3L	3198992	+	DGRP235:1.000
chr3L	3199071	-	DGRP409:0.940
chr3L	3249231	+	DGRP563:1.000
chr3L	3249300	-	DGRP352:1.000;DGRP712:1.000;DGRP859:1.000
chr3L	3249305	-	DGRP195:1.000
chr3L	3249329	+	DGRP855:1.000
chr3L	3249888	-	DGRP591:1.000;DGRP850:1.000;DGRP853:1.000;DGRP861:1.000
chr3L	3249950	-	DGRP426:1.000
chr3L	3250021	-	DGRP85:0.978
chr3L	3250022	+	DGRP491:1.000
chr3L	3250362	+	DGRP272:1.000;DGRP287:1.000
chr3L	3250427	-	DGRP804:1.000
chr3L	3250484	+	DGRP223:1.000
chr3L	3250549	+	DGRP31:0.837
chr3L	3250549	-	DGRP383:0.905;DGRP397:0.423
chr3L	3542956	-	DGRP233:0.800
chr3L	3757916	-	DGRP737:1.000;DGRP894:1.000;DGRP907:1.000
chr3L	3767904	-	DGRP31:1.000;DGRP890:1.000
chr3L	3783069	-	DGRP796:0.919
chr3L	3819969	+	DGRP227:1.000
chr3L	3892350	-	DGRP391:1.000
chr3L	3893001	+	DGRP443:1.000
chr3L	3925707	-	DGRP879:0.923
chr3L	3925927	+	DGRP352:1.000;DGRP712:1.000;DGRP859:1.000
chr3L	3942495	-	DGRP233:1.000
chr3L	3983845	-	DGRP757:0.833
chr3L	4070423	+	DGRP32:1.000
chr3L	4073976	+	DGRP149:1.000
chr3L	4102701	-	DGRP336:1.000
chr3L	4103840	+	DGRP149:1.000
chr3L	4133895	+	DGRP374:1.000
chr3L	4160999	-	DGRP377:1.000
chr3L	4189994	+	DGRP380:0.967
chr3L	4253881	+	DGRP890:1.000
chr3L	4516455	+	DGRP374:1.000
chr3L	4544127	-	DGRP821:1.000
chr3L	4624764	-	DGRP350:0.886;DGRP358:1.000
chr3L	4692612	-	DGRP508:1.000
chr3L	4692744	+	DGRP348:1.000;DGRP350:1.000;DGRP358:1.000
chr3L	4692768	+	DGRP340:1.000
chr3L	4692768	-	DGRP761:1.000
chr3L	4755638	-	DGRP38:1.000
chr3L	4786917	-	DGRP812:1.000
chr3L	4976301	+	DGRP303:0.516;DGRP596:0.314
chr3L	4976311	+	DGRP362:1.000
chr3L	4976392	+	DGRP340:1.000
chr3L	4976467	+	DGRP362:1.000
chr3L	5184714	-	DGRP239:1.000
chr3L	5185011	+	DGRP377:1.000
chr3L	5187542	-	DGRP707:1.000
chr3L	5248473	-	DGRP356:1.000
chr3L	5351525	-	DGRP757:1.000
chr3L	5355342	+	DGRP721:1.000;DGRP738:1.000;DGRP861:1.000;DGRP897:1.000
chr3L	5355361	-	DGRP381:1.000;DGRP513:0.560
chr3L	5355392	+	DGRP390:0.722;DGRP88:1.000;DGRP911:1.000
chr3L	5355397	-	DGRP32:1.000;DGRP559:1.000
chr3L	5355401	+	DGRP360:0.947;DGRP405:1.000
chr3L	5355740	+	DGRP195:1.000
chr3L	5563697	-	DGRP884:1.000
chr3L	5634401	-	DGRP256:1.000
chr3L	5691008	+	DGRP530:1.000;DGRP714:1.000
chr3L	5691155	-	DGRP303:0.074;DGRP381:1.000;DGRP513:0.667;DGRP584:1.000
chr3L	5752176	+	DGRP233:0.556;DGRP303:0.148
chr3L	5752176	-	DGRP228:1.000
chr3L	5752201	-	DGRP340:1.000
chr3L	5765551	-	DGRP217:1.000
chr3L	5769151	+	DGRP227:1.000
chr3L	5976116	+	DGRP639:1.000
chr3L	6218052	-	DGRP492:1.000
chr3L	6218059	+	DGRP820:1.000
chr3L	6218085	+	DGRP884:1.000
chr3L	6218085	-	DGRP884:1.000
chr3L	6218089	+	DGRP340:1.000
chr3L	6218154	-	DGRP318:1.000
chr3L	6218659	-	DGRP409:0.970
chr3L	6218682	+	DGRP390:1.000
chr3L	6218692	-	DGRP256:1.000
chr3L	6218708	-	DGRP596:0.879
chr3L	6218761	+	DGRP149:1.000;DGRP324:1.000;DGRP439:1.000;DGRP505:1.000
chr3L	6218761	-	DGRP324:1.000
chr3L	6268503	+	DGRP528:1.000
chr3L	6285712	+	DGRP535:1.000;DGRP913:0.769
chr3L	6495651	+	DGRP589:1.000
chr3L	6653075	+	DGRP818:1.000
chr3L	6895376	+	DGRP397:1.000
chr3L	6943471	-	DGRP530:1.000
chr3L	6943519	-	DGRP406:1.000
chr3L	6964261	+	DGRP26:1.000
chr3L	6964758	+	DGRP377:1.000
chr3L	6964758	-	DGRP646:1.000
chr3L	6969721	+	DGRP705:1.000;DGRP235:1.000;DGRP627:1.000
chr3L	7094813	-	DGRP239:1.000
chr3L	7094825	+	DGRP303:0.863;DGRP642:1.000
chr3L	7134494	+	DGRP233:0.432;DGRP359:1.000;DGRP804:0.250
chr3L	7134495	-	DGRP890:1.000
chr3L	7134532	-	DGRP223:1.000
chr3L	7134593	-	DGRP393:1.000
chr3L	7156310	+	DGRP356:1.000
chr3L	7328793	+	DGRP513:1.000;DGRP596:1.000
chr3L	7328793	-	DGRP596:1.000
chr3L	7348333	+	DGRP805:1.000
chr3L	7368714	+	DGRP176:1.000
chr3L	7370581	+	DGRP491:1.000
chr3L	7370860	+	DGRP309:1.000
chr3L	7423773	-	DGRP796:1.000
chr3L	7423793	+	DGRP390:1.000
chr3L	7433728	+	DGRP832:1.000
chr3L	7435119	-	DGRP228:1.000
chr3L	7435316	+	DGRP517:0.991
chr3L	7511196	+	DGRP900:1.000
chr3L	7772191	+	DGRP38:1.000
chr3L	7808869	+	DGRP646:1.000
chr3L	7808922	+	DGRP509:1.000
chr3L	7911607	+	DGRP531:1.000
chr3L	8057669	-	DGRP801:1.000;DGRP849:1.000
chr3L	8057723	+	DGRP801:1.000;DGRP849:1.000
chr3L	8063852	+	DGRP502:1.000
chr3L	8064176	+	DGRP900:1.000
chr3L	8116152	-	DGRP705:1.000
chr3L	8360985	-	DGRP303:0.414;DGRP304:1.000;DGRP306:1.000
chr3L	8455114	-	DGRP596:1.000
chr3L	8590263	-	DGRP195:1.000
chr3L	8675665	+	DGRP233:0.887
chr3L	8745578	+	DGRP272:1.000
chr3L	8766381	+	DGRP787:1.000
chr3L	8766439	+	DGRP727:1.000
chr3L	8825771	-	DGRP732:1.000
chr3L	8826829	+	DGRP32:0.992
chr3L	8827438	+	DGRP332:1.000
chr3L	8827465	-	DGRP233:0.967
chr3L	8827471	+	DGRP101:0.909;DGRP223:0.333;DGRP639:0.258
chr3L	8827479	-	DGRP195:1.000;DGRP93:1.000;DGRP559:1.000;DGRP596:1.000
chr3L	8827484	+	DGRP332:1.000;DGRP233:0.917
chr3L	8827484	-	DGRP136:0.850;DGRP350:0.389
chr3L	8953236	+	DGRP551:1.000
chr3L	8953248	+	DGRP818:1.000
chr3L	8953255	+	DGRP804:1.000;DGRP714:1.000
chr3L	9041123	+	DGRP837:1.000
chr3L	9128950	+	DGRP181:1.000
chr3L	9130507	+	DGRP176:1.000;DGRP374:1.000
chr3L	9134738	+	DGRP48:1.000
chr3L	9261230	-	DGRP49:1.000;DGRP887:1.000
chr3L	9337976	+	DGRP57:1.000
chr3L	9349545	+	DGRP101:1.000
chr3L	9349545	-	DGRP101:1.000
chr3L	9349614	-	DGRP319:1.000
chr3L	9373630	-	DGRP223:1.000
chr3L	9373651	+	DGRP409:1.000
chr3L	9373933	-	DGRP256:1.000
chr3L	9377369	+	DGRP461:1.000
chr3L	9377410	+	DGRP49:1.000
chr3L	9377434	+	DGRP897:1.000
chr3L	9381522	+	DGRP319:1.000
chr3L	9381522	-	DGRP324:1.000;DGRP810:1.000;DGRP812:1.000
chr3L	9381626	-	DGRP332:1.000
chr3L	9381788	-	DGRP21:1.000
chr3L	9383642	+	DGRP362:1.000
chr3L	9383999	-	DGRP42:1.000
chr3L	9420555	+	DGRP409:0.982
chr3L	9422888	-	DGRP721:1.000
chr3L	9423165	+	DGRP392:0.857;DGRP395:1.000;DGRP399:1.000
chr3L	9423169	+	DGRP352:0.867
chr3L	9426717	-	DGRP317:1.000;DGRP318:1.000;DGRP378:1.000;DGRP397:1.000;DGRP535:1.000
chr3L	9426735	+	DGRP491:1.000
chr3L	9426735	-	DGRP129:1.000;DGRP332:1.000;DGRP884:1.000
chr3L	9462583	-	DGRP229:1.000;DGRP804:0.565
chr3L	9487757	+	DGRP378:1.000
chr3L	9501597	-	DGRP367:1.000
chr3L	9505343	-	DGRP217:1.000
chr3L	9505347	+	DGRP223:1.000;DGRP233:0.885
chr3L	9505347	-	DGRP810:1.000;DGRP812:1.000
chr3L	9505932	+	DGRP332:1.000
chr3L	9547215	+	DGRP318:1.000;DGRP378:1.000;DGRP317:1.000
chr3L	9698359	+	DGRP566:1.000
chr3L	9714322	-	DGRP748:1.000
chr3L	9763520	+	DGRP223:1.000
chr3L	9763582	-	DGRP310:1.000
chr3L	9763633	+	DGRP627:1.000
chr3L	9763735	+	DGRP879:0.846
chr3L	9888774	-	DGRP531:1.000
chr3L	9968330	+	DGRP359:1.000
chr3L	9974434	-	DGRP808:1.000
chr3L	10289389	+	DGRP787:1.000
chr3L	10319780	+	DGRP646:1.000
chr3L	10363873	-	DGRP229:1.000
chr3L	10363952	-	DGRP591:1.000
chr3L	10637903	+	DGRP491:1.000
chr3L	10660898	+	DGRP109:1.000
chr3L	10678104	-	DGRP843:1.000;DGRP879:1.000
chr3L	10817817	-	DGRP787:1.000
chr3L	10857859	-	DGRP703:1.000
chr3L	11008950	+	DGRP101:1.000;DGRP287:1.000;DGRP382:1.000;DGRP757:0.731;DGRP820:1.000
chr3L	11008950	-	DGRP42:1.000
chr3L	11009213	-	DGRP85:1.000
chr3L	11011007	-	DGRP566:1.000;DGRP790:1.000
chr3L	11046678	-	DGRP59:1.000
chr3L	11069882	+	DGRP223:1.000
chr3L	11069896	-	DGRP138:1.000
chr3L	11070545	-	DGRP850:1.000;DGRP853:1.000;DGRP859:1.000
chr3L	11084635	+	DGRP42:1.000
chr3L	11084670	-	DGRP223:1.000
chr3L	11090416	+	DGRP223:0.977
chr3L	11096897	+	DGRP377:1.000
chr3L	11096941	-	DGRP509:1.000
chr3L	11096996	-	DGRP843:0.908
chr3L	11118856	-	DGRP32:1.000
chr3L	11119727	+	DGRP563:1.000
chr3L	11120182	+	DGRP757:1.000
chr3L	11165008	-	DGRP367:1.000
chr3L	11197353	-	DGRP395:1.000
chr3L	11206036	-	DGRP810:0.958;DGRP812:1.000
chr3L	11210368	-	DGRP303:0.896
chr3L	11210903	+	DGRP517:0.992
chr3L	11215424	+	DGRP370:0.833
chr3L	11215763	-	DGRP318:0.964
chr3L	11215768	+	DGRP882:1.000;DGRP887:1.000
chr3L	11248003	+	DGRP395:1.000
chr3L	11252293	+	DGRP812:1.000
chr3L	11295813	+	DGRP707:1.000
chr3L	11365147	-	DGRP217:1.000
chr3L	11478322	-	DGRP882:1.000;DGRP887:1.000
chr3L	11487415	-	DGRP233:1.000
chr3L	11487556	+	DGRP897:1.000
chr3L	11487556	-	DGRP443:1.000
chr3L	11493439	+	DGRP32:1.000
chr3L	11553116	+	DGRP837:1.000
chr3L	11553140	+	DGRP380:1.000
chr3L	11553293	+	DGRP233:1.000;DGRP57:1.000
chr3L	11553402	+	DGRP405:1.000
chr3L	11553402	-	DGRP136:0.833;DGRP272:1.000;DGRP287:1.000;DGRP350:0.935;DGRP358:1.000
chr3L	11553523	-	DGRP319:1.000
chr3L	11554792	-	DGRP517:1.000
chr3L	11554809	+	DGRP309:1.000
chr3L	11561126	-	DGRP233:1.000
chr3L	11588181	+	DGRP223:1.000
chr3L	11588181	-	DGRP223:1.000
chr3L	11588190	+	DGRP223:1.000
chr3L	11623747	+	DGRP426:1.000
chr3L	11683992	+	DGRP714:1.000
chr3L	11684899	-	DGRP315:1.000
chr3L	11696825	-	DGRP233:0.917
chr3L	11696996	-	DGRP596:1.000
chr3L	11708535	-	DGRP439:1.000
chr3L	11708572	+	DGRP256:1.000
chr3L	11708601	-	DGRP354:1.000
chr3L	11819921	-	DGRP492:1.000
chr3L	11819965	+	DGRP229:1.000
chr3L	11820022	+	DGRP492:1.000
chr3L	11821982	-	DGRP318:0.979;DGRP378:0.935
chr3L	12004304	+	DGRP208:1.000
chr3L	12004402	+	DGRP359:1.000
chr3L	12056647	+	DGRP91:1.000
chr3L	12081855	+	DGRP821:1.000;DGRP85:1.000
chr3L	12081855	-	DGRP821:1.000;DGRP85:1.000
chr3L	12081873	-	DGRP397:1.000
chr3L	12081982	+	DGRP136:0.765;DGRP627:1.000;DGRP787:1.000;DGRP802:0.671
chr3L	12145613	+	DGRP437:1.000
chr3L	12181551	-	DGRP566:1.000;DGRP790:1.000
chr3L	12203931	-	DGRP528:1.000
chr3L	12266783	-	DGRP31:0.863
chr3L	12387002	-	DGRP57:1.000
chr3L	12688080	+	DGRP884:1.000
chr3L	12791189	-	DGRP390:1.000
chr3L	12805091	-	DGRP318:0.970
chr3L	12843172	-	DGRP821:1.000
chr3L	12914057	-	DGRP320:1.000
chr3L	13022630	-	DGRP361:1.000
chr3L	13114236	-	DGRP787:1.000;DGRP802:0.947
chr3L	13135724	-	DGRP837:1.000
chr3L	13227772	+	DGRP38:1.000
chr3L	13227779	+	DGRP362:0.983
chr3L	13228372	+	DGRP887:1.000
chr3L	13228497	+	DGRP397:1.000
chr3L	13228525	+	DGRP32:1.000;DGRP426:1.000
chr3L	13228525	-	DGRP142:1.000;DGRP228:1.000;DGRP362:0.975;DGRP509:1.000
chr3L	13228548	+	DGRP509:1.000
chr3L	13228630	+	DGRP383:1.000
chr3L	13450240	-	DGRP319:1.000;DGRP774:1.000
chr3L	13450257	-	DGRP75:1.000
chr3L	13486251	+	DGRP223:1.000
chr3L	13521910	+	DGRP492:1.000
chr3L	13588643	+	DGRP850:1.000;DGRP853:1.000;DGRP859:1.000
chr3L	13666777	-	DGRP707:1.000
chr3L	13666867	-	DGRP161:1.000;DGRP239:0.235
chr3L	13667353	+	DGRP310:1.000
chr3L	13902371	+	DGRP239:1.000
chr3L	13902383	+	DGRP239:1.000
chr3L	13919998	+	DGRP256:1.000
chr3L	13920112	-	DGRP195:1.000
chr3L	13920117	+	DGRP646:1.000
chr3L	13925365	-	DGRP301:0.981
chr3L	13925388	+	DGRP195:1.000;DGRP821:1.000
chr3L	13939121	+	DGRP100:1.000
chr3L	13939212	+	DGRP354:1.000
chr3L	13964627	-	DGRP397:1.000
chr3L	13993505	+	DGRP818:0.820;DGRP40:1.000
chr3L	13993551	+	DGRP321:1.000;DGRP584:1.000;DGRP799:1.000;DGRP801:0.968;DGRP802:0.847;DGRP900:1.000
chr3L	13993603	-	DGRP849:1.000
chr3L	13994220	-	DGRP530:1.000
chr3L	13994250	+	DGRP235:1.000
chr3L	13997207	-	DGRP566:1.000
chr3L	14005377	+	DGRP559:1.000
chr3L	14038278	-	DGRP882:1.000
chr3L	14038456	-	DGRP705:1.000
chr3L	14053134	-	DGRP375:1.000
chr3L	14076941	+	DGRP189:1.000
chr3L	14077035	-	DGRP26:1.000
chr3L	14177693	+	DGRP646:1.000;DGRP566:0.538
chr3L	14178033	+	DGRP757:1.000
chr3L	14190858	+	DGRP727:1.000
chr3L	14201145	+	DGRP195:1.000
chr3L	14274193	+	DGRP177:1.000
chr3L	14274223	+	DGRP217:1.000
chr3L	14274223	-	DGRP100:1.000
chr3L	14274231	-	DGRP440:1.000
chr3L	14274310	-	DGRP142:0.917
chr3L	14409977	+	DGRP309:0.975
chr3L	14410500	-	DGRP26:1.000
chr3L	14427283	+	DGRP189:1.000
chr3L	14427420	-	DGRP309:1.000
chr3L	14427421	+	DGRP189:1.000
chr3L	14427473	+	DGRP908:1.000
chr3L	14448708	+	DGRP227:1.000
chr3L	14476917	+	DGRP383:1.000
chr3L	14477124	-	DGRP491:1.000;DGRP634:1.000
chr3L	14477170	-	DGRP317:1.000
chr3L	14537656	+	DGRP32:0.681;DGRP821:1.000
chr3L	14551016	+	DGRP443:1.000;DGRP761:1.000
chr3L	14551016	-	DGRP761:1.000;DGRP913:0.500
chr3L	14551019	-	DGRP808:1.000
chr3L	14551649	-	DGRP239:1.000
chr3L	14632040	+	DGRP59:0.926
chr3L	14632574	+	DGRP443:1.000
chr3L	14632992	-	DGRP223:1.000
chr3L	14733535	-	DGRP732:1.000
chr3L	14755053	+	DGRP142:1.000
chr3L	14755130	+	DGRP721:1.000
chr3L	14755354	-	DGRP223:1.000;DGRP233:1.000
chr3L	14756748	+	DGRP502:1.000
chr3L	14756791	+	DGRP158:1.000
chr3L	14758454	-	DGRP505:1.000
chr3L	14758978	+	DGRP208:1.000
chr3L	14762038	+	DGRP774:1.000
chr3L	14790317	-	DGRP348:1.000;DGRP350:0.886;DGRP358:1.000
chr3L	14968495	-	DGRP566:1.000;DGRP900:1.000
chr3L	14969267	-	DGRP317:1.000
chr3L	14987176	+	DGRP426:1.000
chr3L	14992165	-	DGRP181:1.000
chr3L	14992266	-	DGRP332:1.000;DGRP821:1.000
chr3L	15035167	-	DGRP338:1.000
chr3L	15035389	+	DGRP256:1.000
chr3L	15072211	-	DGRP355:1.000
chr3L	15079572	+	DGRP426:1.000
chr3L	15098737	+	DGRP513:1.000
chr3L	15101715	+	DGRP783:1.000
chr3L	15101905	-	DGRP591:1.000
chr3L	15136309	-	DGRP189:1.000
chr3L	15146819	-	DGRP85:1.000
chr3L	15161814	+	DGRP804:1.000
chr3L	15234409	+	DGRP383:1.000;DGRP398:1.000
chr3L	15234542	+	DGRP375:0.838
chr3L	15508225	-	DGRP642:1.000
chr3L	15532626	-	DGRP441:1.000
chr3L	15563046	+	DGRP390:1.000
chr3L	15563813	-	DGRP374:1.000
chr3L	15588857	+	DGRP208:1.000
chr3L	15593480	-	DGRP105:1.000
chr3L	15699960	-	DGRP849:1.000
chr3L	15825713	+	DGRP884:1.000;DGRP93:0.982
chr3L	15825713	-	DGRP796:1.000
chr3L	15953031	-	DGRP566:1.000;DGRP900:1.000
chr3L	15968218	-	DGRP31:0.800;DGRP359:1.000
chr3L	15968227	-	DGRP142:1.000
chr3L	16004260	+	DGRP303:0.905;DGRP703:1.000
chr3L	16012279	+	DGRP563:1.000
chr3L	16023287	-	DGRP83:1.000
chr3L	16046907	+	DGRP426:1.000;DGRP441:0.389;DGRP796:1.000
chr3L	16046907	-	DGRP426:1.000
chr3L	16046914	+	DGRP142:1.000;DGRP31:0.419
chr3L	16046914	-	DGRP908:1.000;DGRP49:0.667
chr3L	16087506	+	DGRP301:1.000
chr3L	16087506	-	DGRP161:0.750;DGRP367:0.842
chr3L	16087559	-	DGRP233:1.000;DGRP303:1.000;DGRP306:1.000;DGRP703:1.000
chr3L	16113248	-	DGRP437:1.000
chr3L	16145351	+	DGRP73:0.879
chr3L	16408262	+	DGRP737:1.000
chr3L	16408428	+	DGRP21:1.000
chr3L	16484170	-	DGRP857:1.000
chr3L	16484186	-	DGRP195:1.000
chr3L	16484246	+	DGRP91:1.000
chr3L	16485112	+	DGRP161:1.000
chr3L	16496244	+	DGRP142:1.000
chr3L	16587320	-	DGRP181:1.000
chr3L	16602994	+	DGRP437:1.000
chr3L	16612483	+	DGRP528:1.000
chr3L	16660126	+	DGRP737:0.944
chr3L	16661372	+	DGRP340:1.000
chr3L	16661645	-	DGRP101:1.000
chr3L	16668319	+	DGRP181:1.000
chr3L	16746592	+	DGRP732:1.000
chr3L	16779304	+	DGRP646:1.000
chr3L	16780650	+	DGRP737:1.000
chr3L	16800286	+	DGRP892:1.000
chr3L	16806648	+	DGRP235:1.000;DGRP38:1.000;DGRP437:1.000;DGRP508:1.000
chr3L	16807753	+	DGRP563:1.000
chr3L	16807753	-	DGRP646:1.000
chr3L	16807764	+	DGRP129:1.000
chr3L	16807764	-	DGRP309:1.000;DGRP57:1.000;DGRP716:1.000;DGRP861:1.000;DGRP900:1.000;DGRP908:1.000
chr3L	16842276	-	DGRP441:1.000;DGRP911:1.000
chr3L	16891141	+	DGRP707:1.000
chr3L	16891150	+	DGRP307:1.000;DGRP32:0.692;DGRP492:1.000
chr3L	16891150	-	DGRP307:1.000;DGRP48:0.952
chr3L	16891163	+	DGRP40:1.000
chr3L	16955486	+	DGRP370:1.000;DGRP406:1.000
chr3L	17010168	+	DGRP318:1.000
chr3L	17032209	-	DGRP272:1.000;DGRP287:1.000
chr3L	17032213	+	DGRP374:1.000
chr3L	17032299	+	DGRP256:1.000
chr3L	17040416	-	DGRP149:1.000
chr3L	17045022	+	DGRP805:1.000
chr3L	17049414	+	DGRP492:1.000
chr3L	17245825	+	DGRP360:1.000
chr3L	17245843	+	DGRP138:1.000
chr3L	17351958	-	DGRP765:1.000
chr3L	17421518	+	DGRP223:1.000
chr3L	17421531	-	DGRP338:1.000
chr3L	17421545	+	DGRP223:1.000
chr3L	17421545	-	DGRP371:1.000;DGRP796:1.000
chr3L	17421678	-	DGRP310:1.000
chr3L	17563691	+	DGRP849:0.990
chr3L	17576761	-	DGRP360:1.000
chr3L	17590719	-	DGRP843:1.000;DGRP879:1.000
chr3L	17590752	+	DGRP239:1.000
chr3L	17590854	+	DGRP239:1.000
chr3L	17590951	+	DGRP354:1.000;DGRP355:1.000
chr3L	17611672	-	DGRP348:1.000;DGRP350:1.000;DGRP358:1.000
chr3L	17612150	-	DGRP630:1.000
chr3L	17621868	+	DGRP340:1.000
chr3L	17640677	-	DGRP892:1.000
chr3L	17740622	+	DGRP820:1.000
chr3L	17841153	-	DGRP441:1.000
chr3L	17857334	-	DGRP820:1.000
chr3L	17861935	-	DGRP787:1.000;DGRP802:0.873
chr3L	17871120	-	DGRP843:1.000;DGRP879:1.000
chr3L	17879016	+	DGRP69:0.857
chr3L	17907797	+	DGRP890:1.000
chr3L	17907802	-	DGRP849:1.000
chr3L	17907903	+	DGRP634:1.000
chr3L	17964857	-	DGRP287:0.952
chr3L	17965060	+	DGRP381:1.000
chr3L	17969272	+	DGRP315:1.000
chr3L	17969306	-	DGRP233:1.000
chr3L	17971230	+	DGRP348:1.000;DGRP350:0.800;DGRP358:1.000;DGRP390:1.000;DGRP832:1.000
chr3L	17971230	-	DGRP239:1.000
chr3L	17971274	+	DGRP338:1.000
chr3L	17972535	+	DGRP383:1.000;DGRP398:1.000;DGRP732:0.600
chr3L	17973207	-	DGRP223:1.000;DGRP818:0.525
chr3L	17999395	+	DGRP189:1.000
chr3L	17999535	-	DGRP563:1.000
chr3L	17999971	+	DGRP563:1.000
chr3L	18106169	+	DGRP272:1.000;DGRP287:1.000
chr3L	18106192	+	DGRP397:1.000
chr3L	18139231	-	DGRP136:0.933
chr3L	18139304	+	DGRP233:1.000
chr3L	18139304	-	DGRP566:1.000
chr3L	18186948	-	DGRP129:1.000
chr3L	18463192	-	DGRP223:1.000
chr3L	18463253	-	DGRP45:1.000
chr3L	18641375	+	DGRP595:1.000
chr3L	18641375	-	DGRP83:1.000
chr3L	18682186	+	DGRP783:1.000
chr3L	18723366	+	DGRP350:0.846
chr3L	18723721	+	DGRP129:1.000
chr3L	18757267	+	DGRP405:1.000
chr3L	18760775	+	DGRP307:1.000;DGRP627:1.000
chr3L	18765840	+	DGRP897:1.000
chr3L	18765873	+	DGRP336:1.000
chr3L	18765913	+	DGRP354:1.000;DGRP355:1.000;DGRP505:1.000
chr3L	18771673	+	DGRP892:1.000
chr3L	18820689	-	DGRP892:1.000
chr3L	18840511	+	DGRP229:1.000
chr3L	18840531	+	DGRP528:1.000
chr3L	18840537	+	DGRP440:1.000;DGRP75:1.000
chr3L	18891009	+	DGRP596:1.000
chr3L	19045473	+	DGRP721:1.000
chr3L	19063487	-	DGRP142:1.000
chr3L	19086684	-	DGRP897:1.000
chr3L	19087076	+	DGRP100:1.000
chr3L	19087198	+	DGRP319:1.000
chr3L	19087794	-	DGRP176:1.000
chr3L	19170689	-	DGRP377:1.000
chr3L	19170705	+	DGRP383:1.000;DGRP398:1.000
chr3L	19170705	-	DGRP69:0.850
chr3L	19170712	+	DGRP818:0.880
chr3L	19331981	-	DGRP354:1.000;DGRP355:1.000
chr3L	19431758	-	DGRP820:1.000
chr3L	19468093	+	DGRP177:1.000
chr3L	19482100	-	DGRP367:1.000
chr3L	19586305	+	DGRP765:1.000
chr3L	19635906	-	DGRP559:0.905
chr3L	19791515	-	DGRP887:1.000
chr3L	19791524	+	DGRP554:1.000;DGRP555:1.000;DGRP810:1.000;DGRP812:0.984;DGRP818:0.717
chr3L	19793427	+	DGRP843:1.000
chr3L	19818179	-	DGRP256:1.000
chr3L	19861443	-	DGRP911:1.000
chr3L	19861472	+	DGRP227:1.000
chr3L	19899682	+	DGRP38:1.000
chr3L	19907220	+	DGRP321:0.647;DGRP584:1.000;DGRP748:1.000;DGRP799:1.000;DGRP801:0.967;DGRP802:0.577;DGRP907:0.737;DGRP913:0.737
chr3L	19908182	+	DGRP88:1.000
chr3L	19908376	+	DGRP703:1.000
chr3L	19914026	+	DGRP75:1.000
chr3L	19924872	-	DGRP375:0.907
chr3L	19929174	+	DGRP787:1.000;DGRP802:0.742
chr3L	19929174	-	DGRP787:1.000
chr3L	20001620	-	DGRP129:1.000
chr3L	20104323	+	DGRP884:1.000
chr3L	20104865	-	DGRP338:1.000;DGRP492:1.000
chr3L	20198332	+	DGRP812:1.000
chr3L	20198338	+	DGRP555:1.000;DGRP810:1.000
chr3L	20198400	+	DGRP101:1.000
chr3L	20349512	+	DGRP303:0.904
chr3L	20401621	+	DGRP318:1.000;DGRP378:1.000;DGRP48:0.574
chr3L	20401755	-	DGRP732:0.854
chr3L	20401786	+	DGRP559:0.882
chr3L	20401869	-	DGRP93:1.000
chr3L	20441830	-	DGRP40:1.000
chr3L	20464826	+	DGRP406:1.000
chr3L	20472876	+	DGRP395:1.000;DGRP399:1.000
chr3L	20493469	+	DGRP228:1.000
chr3L	20497363	+	DGRP129:1.000
chr3L	20509322	+	DGRP149:1.000
chr3L	20519378	-	DGRP233:1.000
chr3L	20620892	+	DGRP129:1.000
chr3L	20621658	+	DGRP843:1.000
chr3L	20621744	+	DGRP195:1.000
chr3L	20624480	+	DGRP235:1.000;DGRP397:0.750
chr3L	20634412	-	DGRP223:1.000
chr3L	20634437	+	DGRP393:0.886
chr3L	20730438	+	DGRP559:0.879
[truncated: 1,863 more rows]
