# Supplementary material for: Rapid evolution of piRNA-mediated silencing of an invading transposable element was driven by abundant de novo mutations
Source: HighWire-hosted journal article supplement (doi:10.1101/gr.251546.119), 2020-04-01
Supplement: Supplemental_Table_S9.xlsx [file Supplemental_Table_S9.xlsx]

## Sheet: Sheet1
Table S9. PCR primers used to determine P-element insertion breakpoints
Primer name	5' - 3' sequence
P-element5-F1	TTGCTGCAAAGCTGTGACTG
P-enrich	CACGGACATGCTAAGGGTTAATC
TAS-XL-QPCR-R1	CACACTTACCATAGAGCAAGGG
TAS-XL-QPCR-F2	GACTCATATGTACAACTTTGCCAA
TAS-XL-QPCR-R2	CTTCTGGAAATCTTTTTTCAATTTTTATCG
chr2R_25259172	GCAAACAGTCACGTTGCGAA
chr2R_25258834	ACCGATCAACACGACCATTCA
chr3R_32073398	CGACATATGTGTACGCGTCG
chr3R_32073418	GAATGCGAACAGTCACGCTG
TAS-3R-QPCR-R1	TTTTTGTTAGTTGCTTTTGTAAGATT
